# Supplementary material
Source: MDPI journal article supplement (https://www.mdpi.com/2624-8549/5/2/69)
Supplement: s1 [file s1]

## Table of Contents

|                                        |    |
|----------------------------------------|----|
| Experimental section .....             | 2  |
| Crystallographic Data .....            | 3  |
| Interatomic Distances and Angles ..... | 9  |
| Powder Diffraction .....               | 14 |
| Photophysical Properties .....         | 19 |
| IR Spectroscopy .....                  | 42 |

## Experimental section

### Analytical Data

**CHN Analysis:** Carbon, hydrogen, and nitrogen elemental analyses were performed using a Thermo Scientific Flash EA – 1112. The polymers were placed in a tin crucible with no less than one mass equivalent to  $V_2O_5$ . The samples were prepared and stored under inert conditions until the time of measurements.

**Vibrational Spectroscopy:** ALPHA FT-IR spectrometer from Bruker optics (ATR module) using OPUS software was used to record MIR spectra from several milligrams of the compounds.

## Crystallographic Data

CCDC 2237763 (**4-Eu<sup>2+</sup>**), 2237764 (**4-Tm**), 2237765 (**4-Yb**), 2237766 (**4-Lu**), 2237767 (**4-La**), 2237768 (**4-Ce**), 2237769 (**4-Pr**), 2237770 (**4-Nd**), 2237771 (**4-Ho**), 2237772 (**4-Er**), 2237773 (**3-Ce**), 2237774 (**3-Pr**), 2237775 (**3-Nd**), 2237776 (**3-Ho**), 2237777 (**3-Er**), and 2237778 (**3-Tm**) contain the supplementary crystallographic data. These data are provided free of charge by the Cambridge Crystallographic Data Centre.

**Table S1.** Crystallographic data of  ${}^2[\text{Eu}(\text{4-PyPz})_2(\text{Py})_2]$  (**4-Eu<sup>2+</sup>**) and  ${}^2[\text{Ln}_2(\text{4-PyPzH})_6]\cdot\text{Py}$ , Ln = Yb (**4-Yb**) and Lu (**4-Lu**).

| Compound                                                                                    | ${}^2[\text{Eu}(\text{4-PyPz})_2(\text{Py})_2]$                 | ${}^2[\text{Yb}_2(\text{4-PyPzH})_6]\cdot\text{Py}$             | ${}^2[\text{Lu}_2(\text{4-PyPzH})_6]\cdot\text{Py}$             |
|---------------------------------------------------------------------------------------------|-----------------------------------------------------------------|-----------------------------------------------------------------|-----------------------------------------------------------------|
| CCDC number                                                                                 | 2237763                                                         | 2237765                                                         | 2237766                                                         |
| Empirical formula                                                                           | C <sub>26</sub> H <sub>22</sub> N <sub>8</sub> Eu               | C <sub>53</sub> H <sub>41</sub> N <sub>19</sub> Yb <sub>2</sub> | C <sub>53</sub> H <sub>41</sub> N <sub>19</sub> Lu <sub>2</sub> |
| <i>M<sub>r</sub></i> / g·mol <sup>-1</sup>                                                  | 598.47                                                          | 1290.13                                                         | 1293.99                                                         |
| <i>T</i> / K                                                                                | 100(2)                                                          | 100(2)                                                          | 100(2)                                                          |
| $\lambda$ / pm                                                                              | 71.073,                                                         | 71.073,                                                         | 71.073                                                          |
|                                                                                             | Mo-K $\alpha$                                                   | Mo-K $\alpha$                                                   | Mo-K $\alpha$                                                   |
| Crystal system                                                                              | Monoclinic                                                      | Monoclinic                                                      | Monoclinic                                                      |
| Space group                                                                                 | <i>P</i> 2 <sub>1</sub>                                         | <i>P</i> 2 <sub>1</sub> / <i>n</i>                              | <i>P</i> 2 <sub>1</sub> / <i>n</i>                              |
| <i>a</i> / pm                                                                               | 944.4(1)                                                        | 1701.5(2)                                                       | 1702.1(2)                                                       |
| <i>b</i> / pm                                                                               | 1458.4(1)                                                       | 910.7(1)                                                        | 909.5(1)                                                        |
| <i>c</i> / pm                                                                               | 997.6(1)                                                        | 3161.8(4)                                                       | 3155.2(4)                                                       |
| $\alpha$ , $\gamma$ / °                                                                     | 90                                                              | 90                                                              | 90                                                              |
| $\beta$ / °                                                                                 | 117.170(4)                                                      | 97.289(5)                                                       | 97.109(4)                                                       |
| <i>V</i> / 10 <sup>6</sup> pm <sup>3</sup>                                                  | 1222.4(2)                                                       | 4859(1)                                                         | 4846.9(9)                                                       |
| <i>Z</i>                                                                                    | 2                                                               | 4                                                               | 4                                                               |
| $\rho_{\text{calc}}$ / g·cm <sup>-3</sup>                                                   | 1.626                                                           | 1.763                                                           | 1.773                                                           |
| $\mu$ / mm <sup>-1</sup>                                                                    | 2.596                                                           | 3.886                                                           | 4.110                                                           |
| <i>F</i> (000)                                                                              | 594                                                             | 2528                                                            | 2536                                                            |
| Crystal size / mm <sup>3</sup>                                                              | 0.070 x 0.060 x 0.030                                           | 0.129 x 0.079 x 0.050                                           | 0.204 x 0.039 x 0.018                                           |
| $\theta_{\text{min}}$ / °                                                                   | 2.295                                                           | 2.157                                                           | 2.163                                                           |
| $\theta_{\text{max}}$ / °                                                                   | 27.567                                                          | 27.577                                                          | 27.635                                                          |
| Reflections collected                                                                       | 44595                                                           | 154420                                                          | 164975                                                          |
| Independent reflections                                                                     | 5603                                                            | 11219                                                           | 11219                                                           |
| <i>R</i> (int)                                                                              | 0.0414                                                          | 0.1890                                                          | 0.1214                                                          |
| No. Of parameters                                                                           | 316                                                             | 810                                                             | 810                                                             |
| GOF                                                                                         | 1.137                                                           | 1.066                                                           | 1.047                                                           |
| Final <i>R</i> indices [ <i>I</i> > 2 $\sigma$ ( <i>I</i> )]                                | <i>R</i> <sub>1</sub> = 0.0141, <i>wR</i> <sub>2</sub> = 0.0296 | <i>R</i> <sub>1</sub> = 0.0515, <i>wR</i> <sub>2</sub> = 0.0849 | <i>R</i> <sub>1</sub> = 0.0404, <i>wR</i> <sub>2</sub> = 0.0835 |
| <i>R</i> indices (all data)                                                                 | <i>R</i> <sub>1</sub> = 0.0159, <i>wR</i> <sub>2</sub> = 0.0302 | <i>R</i> <sub>1</sub> = 0.1120, <i>wR</i> <sub>2</sub> = 0.1022 | <i>R</i> <sub>1</sub> = 0.0734, <i>wR</i> <sub>2</sub> = 0.0962 |
| $\Delta\rho_{\text{max}}$ , $\Delta\rho_{\text{min}}$ / e·10 <sup>-6</sup> pm <sup>-3</sup> | 0.734, -0.619                                                   | 2.364, -1.425                                                   | 2.721, -2.064                                                   |

**Table S2.** Crystallographic data of  ${}^2[\text{Tm}(\text{4-PyPz})_3(\text{Py})]$  (**4- ${}^2\text{Tm}$** ).

| Compound                                                                                   | ${}^2[\text{Tm}(\text{4-PyPz})_3(\text{Py})]$      |
|--------------------------------------------------------------------------------------------|----------------------------------------------------|
| CCDC number                                                                                | 2237764                                            |
| Empirical formula                                                                          | $\text{C}_{29}\text{H}_{23}\text{N}_{10}\text{Tm}$ |
| $M_r / \text{g} \cdot \text{mol}^{-1}$                                                     | 680.50                                             |
| $T / \text{K}$                                                                             | 100(2)                                             |
| $\lambda / \text{pm}$                                                                      | 71.073,<br>Mo- $\text{K}_\alpha$                   |
| Crystal system                                                                             | Monoclinic                                         |
| Space group                                                                                | Cc                                                 |
| $a / \text{pm}$                                                                            | 1028.4(1)                                          |
| $b / \text{pm}$                                                                            | 1507.8(1)                                          |
| $c / \text{pm}$                                                                            | 1753.0(2)                                          |
| $\alpha, \gamma / ^\circ$                                                                  | 90                                                 |
| $\beta / ^\circ$                                                                           | 97.759(2)                                          |
| $V / 10^6 \text{pm}^3$                                                                     | 2693.2(4)                                          |
| $Z$                                                                                        | 4                                                  |
| $\rho_{\text{calc}} / \text{g} \cdot \text{cm}^{-3}$                                       | 1.678                                              |
| $\mu / \text{mm}^{-1}$                                                                     | 3.333                                              |
| $F(000)$                                                                                   | 1344                                               |
| Crystal size / $\text{mm}^3$                                                               | 0.055 x 0.023 x 0.020                              |
| $\theta_{\text{min}} / ^\circ$                                                             | 2.345                                              |
| $\theta_{\text{max}} / ^\circ$                                                             | 27.160                                             |
| Reflections collected                                                                      | 42246                                              |
| Independent reflections                                                                    | 5807                                               |
| $R(\text{int})$                                                                            | 0.0860                                             |
| Flack x                                                                                    | 0.003(7)                                           |
| No. Of parameters                                                                          | 361                                                |
| GOF                                                                                        | 1.039                                              |
| Final $R$ indices [ $I > 2\sigma(I)$ ]                                                     | $R_1 = 0.0286,$<br>$wR_2 = 0.0472$                 |
| $R$ indices (all data)                                                                     | $R_1 = 0.0387,$<br>$wR_2 = 0.0494$                 |
| $\Delta\rho_{\text{max}}, \Delta\rho_{\text{min}} / \text{e} \cdot 10^{-6} \text{pm}^{-3}$ | 1.628, -0.744                                      |



**Table S3.** Crystallographic data of  $[\text{Ln}(\text{4-PyPz})_3]$ , Ln = La (**4-La**), Ce (**4-Ce**), Pr (**4-Pr**), and Nd (**4-Nd**).

| Compound                                                                                   | $[\text{La}(\text{4-PyPz})_3]$                  | $[\text{Ce}(\text{4-PyPz})_3]$                  | $[\text{Pr}(\text{4-PyPz})_3]$                  | $[\text{Nd}(\text{4-PyPz})_3]$                  |
|--------------------------------------------------------------------------------------------|-------------------------------------------------|-------------------------------------------------|-------------------------------------------------|-------------------------------------------------|
| CCDC number                                                                                | 2237767                                         | 2237768                                         | 2237769                                         | 2237770                                         |
| Empirical formula                                                                          | $\text{C}_{24}\text{H}_{18}\text{N}_9\text{La}$ | $\text{C}_{24}\text{H}_{18}\text{N}_9\text{Ce}$ | $\text{C}_{24}\text{H}_{18}\text{N}_9\text{Pr}$ | $\text{C}_{24}\text{H}_{18}\text{N}_9\text{Nd}$ |
| $M_r / \text{g} \cdot \text{mol}^{-1}$                                                     | 571.38                                          | 572.59                                          | 573.38                                          | 576.71                                          |
| $T / \text{K}$                                                                             | 100(2)                                          | 100(2)                                          | 100(2)                                          | 100(2)                                          |
| $\lambda / \text{pm}$                                                                      | 0.71073                                         | 0.71073                                         | 0.71073                                         | 0.71073                                         |
| Crystal system                                                                             | Monoclinic                                      | Monoclinic                                      | Monoclinic                                      | Monoclinic                                      |
| Space group                                                                                | $P2_1/n$                                        | $P2_1/n$                                        | $P2_1/n$                                        | $P2_1/n$                                        |
| $a / \text{pm}$                                                                            | 934.0(2)                                        | 929.4(1)                                        | 927.9(2)                                        | 928.1(1)                                        |
| $b / \text{pm}$                                                                            | 1693.2(3)                                       | 1689.7(1)                                       | 1687.5(2)                                       | 1689.6(2)                                       |
| $c / \text{pm}$                                                                            | 1598.9(3)                                       | 1593.1(1)                                       | 1589.8(2)                                       | 1585.4(2)                                       |
| $\alpha, \gamma / ^\circ$                                                                  | 90                                              | 90                                              | 90                                              | 90                                              |
| $\beta / ^\circ$                                                                           | 102.364(6)                                      | 102.384(2)                                      | 102.351(5)                                      | 102.289(4)                                      |
| $V / 10^6 \text{pm}^3$                                                                     | 2469.9(7)                                       | 2443.6(2)                                       | 2431.5(6)                                       | 2429.1(4)                                       |
| $Z$                                                                                        | 4                                               | 4                                               | 4                                               | 4                                               |
| $\rho_{\text{calc}} / \text{g} \cdot \text{cm}^{-3}$                                       | 1.537                                           | 1.556                                           | 1.566                                           | 1.577                                           |
| $\mu / \text{mm}^{-1}$                                                                     | 1.759                                           | 1.893                                           | 2.034                                           | 2.168                                           |
| $F(000)$                                                                                   | 1128                                            | 1132                                            | 1136                                            | 1140                                            |
| Crystal size / $\text{mm}^3$                                                               | 0.026 x 0.013 x<br>0.010                        | 0.042 x 0.021 x<br>0.017                        | 0.055 x 0.022 x<br>0.015                        | 0.789 x 0.147 x<br>0.075                        |
| $\theta_{\text{min}} / ^\circ$                                                             | 2.332                                           | 1.779                                           | 2.347                                           | 1.783                                           |
| $\theta_{\text{max}} / ^\circ$                                                             | 26.501                                          | 27.103                                          | 27.533                                          | 27.485                                          |
| Reflections collected                                                                      | 61095                                           | 85383                                           | 97993                                           | 61076                                           |
| Independent reflections                                                                    | 5114                                            | 5395                                            | 5589                                            | 5565                                            |
| $R(\text{int})$                                                                            | 0.1635                                          | 0.1290                                          | 0.0941                                          | 0.0480                                          |
| No. Of parameters                                                                          | 307                                             | 307                                             | 307                                             | 307                                             |
| GOF                                                                                        | 1.028                                           | 1.031                                           | 1.048                                           | 1.118                                           |
| Final $R$ indices [ $I > 2\sigma(I)$ ]                                                     | $R_1 = 0.0365, wR_2 = 0.0715$                   | $R_1 = 0.0290, wR_2 = 0.0530$                   | $R_1 = 0.0271, wR_2 = 0.0525$                   | $R_1 = 0.0225, wR_2 = 0.0509$                   |
| $R$ indices (all data)                                                                     | $R_1 = 0.0665, wR_2 = 0.0804$                   | $R_1 = 0.0491, wR_2 = 0.0585$                   | $R_1 = 0.0408, wR_2 = 0.0572$                   | $R_1 = 0.0276, wR_2 = 0.0528$                   |
| $\Delta\rho_{\text{max}}, \Delta\rho_{\text{min}} / \text{e} \cdot 10^{-6} \text{pm}^{-3}$ | 1.611, -0.631                                   | 1.579, -0.661                                   | 1.651, -0.651                                   | 1.424, -0.898                                   |

**Table S4.** Crystallographic data of  ${}^3[\text{Ln}(\text{4-PyPz})_3]$ , Ln = Ho (**4-Ho**) and Er (**4-Er**).

| Compound                                                                                   | ${}^3[\text{Ho}(\text{4-PyPz})_3]$              | ${}^3[\text{Er}(\text{4-PyPz})_3]$              |
|--------------------------------------------------------------------------------------------|-------------------------------------------------|-------------------------------------------------|
| CCDC number                                                                                | 2237771                                         | 2237772                                         |
| Empirical formula                                                                          | $\text{C}_{24}\text{H}_{18}\text{N}_9\text{Ho}$ | $\text{C}_{24}\text{H}_{18}\text{N}_9\text{Er}$ |
| $M_r / \text{g} \cdot \text{mol}^{-1}$                                                     | 597.40                                          | 599.73                                          |
| $T / \text{K}$                                                                             | 100(2)                                          | 100(2)                                          |
| $\lambda / \text{pm}$                                                                      | 0.71073                                         | 0.71073                                         |
| Crystal system                                                                             | Monoclinic                                      | Monoclinic                                      |
| Space group                                                                                | $P2_1/n$                                        | $P2_1/n$                                        |
| $a / \text{pm}$                                                                            | 915.9(2)                                        | 913.4(1)                                        |
| $b / \text{pm}$                                                                            | 1674.0(2)                                       | 1673.0(2)                                       |
| $c / \text{pm}$                                                                            | 1571.4(2)                                       | 1565.9(2)                                       |
| $\alpha, \gamma / ^\circ$                                                                  | 90                                              | 90                                              |
| $\beta / ^\circ$                                                                           | 102.280(6)                                      | 102.156(5)                                      |
| $V / 10^6 \text{pm}^3$                                                                     | 2354.2(6)                                       | 2339.3(3)                                       |
| $Z$                                                                                        | 4                                               | 4                                               |
| $\rho_{\text{calc}} / \text{g} \cdot \text{cm}^{-3}$                                       | 1.686                                           | 1.703                                           |
| $\mu / \text{mm}^{-1}$                                                                     | 3.392                                           | 3.619                                           |
| $F(000)$                                                                                   | 1168                                            | 1172                                            |
| Crystal size / $\text{mm}^3$                                                               | 0.114 x 0.070 x<br>0.034                        | 0.116 x 0.073 x<br>0.043                        |
| $\theta_{\text{min}} / ^\circ$                                                             | 1.800                                           | 1.803                                           |
| $\theta_{\text{max}} / ^\circ$                                                             | 27.557                                          | 27.377                                          |
| Reflections collected                                                                      | 5422                                            | 5252                                            |
| Independent reflections                                                                    | 5422                                            | 5252                                            |
| No. Of parameters                                                                          | 308                                             | 308                                             |
| GOF                                                                                        | 1.111                                           | 1.053                                           |
| Final $R$ indices [ $I > 2\sigma(I)$ ]                                                     | $R_1 = 0.0296, wR_2 = 0.0603$                   | $R_1 = 0.0305, wR_2 = 0.0617$                   |
| $R$ indices (all data)                                                                     | $R_1 = 0.0398, wR_2 = 0.0641$                   | $R_1 = 0.0443, wR_2 = 0.0659$                   |
| $\Delta\rho_{\text{max}}, \Delta\rho_{\text{min}} / \text{e} \cdot 10^{-6} \text{pm}^{-3}$ | 2.670, -1.636                                   | 2.145, -1.695                                   |

**Table S5.** Crystallographic data of  $[\text{Ln}(\text{3-PyPz})_3]$ , Ln = Ce (**3-Ce**), Pr (**3-Pr**), Nd (**3-Nd**), and Ho (**3-Ho**).

| Compound                                                                                   | $[\text{Ce}(\text{3-PyPz})_3]$                  | $[\text{Pr}(\text{3-PyPz})_3]$                  | $[\text{Nd}(\text{3-PyPz})_3]$                  | $[\text{Ho}(\text{3-PyPz})_3]$                  |
|--------------------------------------------------------------------------------------------|-------------------------------------------------|-------------------------------------------------|-------------------------------------------------|-------------------------------------------------|
| CCDC number                                                                                | 2237773                                         | 2237774                                         | 2237775                                         | 2237776                                         |
| Empirical formula                                                                          | $\text{C}_{24}\text{H}_{18}\text{N}_9\text{Ce}$ | $\text{C}_{24}\text{H}_{18}\text{N}_9\text{Pr}$ | $\text{C}_{24}\text{H}_{18}\text{N}_9\text{Nd}$ | $\text{C}_{24}\text{H}_{18}\text{N}_9\text{Ho}$ |
| $M_r / \text{g} \cdot \text{mol}^{-1}$                                                     | 572.59                                          | 573.38                                          | 576.71                                          | 597.40                                          |
| $T / \text{K}$                                                                             | 100(2)                                          | 100(2)                                          | 100(2)                                          | 100(2)                                          |
| $\lambda / \text{pm}$                                                                      | 0.71073                                         | 0.71073                                         | 0.71073                                         | 0.71073                                         |
| Crystal system                                                                             | Cubic                                           | Cubic                                           | Cubic                                           | Cubic                                           |
| Space group                                                                                | $Pa\bar{3}$                                     | $Pa\bar{3}$                                     | $Pa\bar{3}$                                     | $Pa\bar{3}$                                     |
| $a, b, c / \text{pm}$                                                                      | 1724.8(1)                                       | 1720.9(1)                                       | 1717.9(1)                                       | 1698.8(1)                                       |
| $\alpha, \beta, \gamma / ^\circ$                                                           | 90                                              | 90                                              | 90                                              | 90                                              |
| $V / 10^6 \text{pm}^3$                                                                     | 5131.2(7)                                       | 5096.1(4)                                       | 5069.8(3)                                       | 4902.3(4)                                       |
| $Z$                                                                                        | 8                                               | 8                                               | 8                                               | 8                                               |
| $\rho_{\text{calc}} / \text{g} \cdot \text{cm}^{-3}$                                       | 1.482                                           | 1.495                                           | 1.511                                           | 1.619                                           |
| $\mu / \text{mm}^{-1}$                                                                     | 1.803                                           | 1.941                                           | 2.077                                           | 3.258                                           |
| $F(000)$                                                                                   | 2264                                            | 2272                                            | 2280                                            | 2336                                            |
| Crystal size / $\text{mm}^3$                                                               | 0.105 x 0.094 x<br>0.075                        | 0.086 x 0.052 x<br>0.043                        | 0.059 x 0.041 x<br>0.018                        | 0.138 x 0.094 x<br>0.065                        |
| $\theta_{\text{min}} / ^\circ$                                                             | 2.045                                           | 2.050                                           | 2.053                                           | 2.076                                           |
| $\theta_{\text{max}} / ^\circ$                                                             | 27.074                                          | 26.718                                          | 27.522                                          | 27.524                                          |
| Reflections collected                                                                      | 37796                                           | 48365                                           | 86496                                           | 97322                                           |
| Independent reflections                                                                    | 1889                                            | 1815                                            | 1955                                            | 1888                                            |
| $R(\text{int})$                                                                            | 0.1778                                          | 0.0775                                          | 0.0990                                          | 0.0644                                          |
| No. Of parameters                                                                          | 103                                             | 103                                             | 103                                             | 103                                             |
| GOF                                                                                        | 1.065                                           | 1.096                                           | 1.100                                           | 1.066                                           |
| Final $R$ indices [ $I > 2\sigma(I)$ ]                                                     | $R_1 = 0.0399, wR_2 = 0.0669$                   | $R_1 = 0.0248, wR_2 = 0.0493$                   | $R_1 = 0.0266, wR_2 = 0.0506$                   | $R_1 = 0.0221, wR_2 = 0.0487$                   |
| $R$ indices (all data)                                                                     | $R_1 = 0.0808, wR_2 = 0.0784$                   | $R_1 = 0.0382, wR_2 = 0.0535$                   | $R_1 = 0.0427, wR_2 = 0.0555$                   | $R_1 = 0.0297, wR_2 = 0.0517$                   |
| $\Delta\rho_{\text{max}}, \Delta\rho_{\text{min}} / \text{e} \cdot 10^{-6} \text{pm}^{-3}$ | 1.325, -0.530                                   | 0.674, -0.567                                   | 0.843, -0.546                                   | 0.799, -0.641                                   |

**Table S6.** Crystallographic data of  $[\text{Ln}(\text{3-PyPz})_3]$ , Ln = Er (**3-Er**) and Tm (**3-Tm**).

| Compound                                                                                   | $[\text{Er}(\text{3-PyPz})_3]$                  | $[\text{Tm}(\text{3-PyPz})_3]$                  |
|--------------------------------------------------------------------------------------------|-------------------------------------------------|-------------------------------------------------|
| CCDC number                                                                                | 2237777                                         | 2237778                                         |
| Empirical formula                                                                          | $\text{C}_{24}\text{H}_{18}\text{N}_9\text{Er}$ | $\text{C}_{24}\text{H}_{18}\text{N}_9\text{Tm}$ |
| $M_r / \text{g} \cdot \text{mol}^{-1}$                                                     | 599.73                                          | 601.40                                          |
| $T / \text{K}$                                                                             | 100(2)                                          | 100(2)                                          |
| $\lambda / \text{pm}$                                                                      | 0.71073                                         | 0.71073                                         |
| Crystal system                                                                             | Cubic                                           | Cubic                                           |
| Space group                                                                                | $Pa\bar{3}$                                     | $Pa\bar{3}$                                     |
| $a, b, c / \text{pm}$                                                                      | 1695.5(1)                                       | 1695.2(4)                                       |
| $\alpha, \beta, \gamma / ^\circ$                                                           | 90                                              | 90                                              |
| $V / 10^6 \text{pm}^3$                                                                     | 4874.2(3)                                       | 4872(3)                                         |
| $Z$                                                                                        | 8                                               | 8                                               |
| $\rho_{\text{calc}} / \text{g} \cdot \text{cm}^{-3}$                                       | 1.635                                           | 1.640                                           |
| $\mu / \text{mm}^{-1}$                                                                     | 3.474                                           | 3.672                                           |
| $F(000)$                                                                                   | 2344                                            | 2352                                            |
| Crystal size / $\text{mm}^3$                                                               | 0.093 x 0.089 x<br>0.074                        | 0.051 x 0.027 x<br>0.012                        |
| $\theta_{\text{min}} / ^\circ$                                                             | 2.080                                           | 2.081                                           |
| $\theta_{\text{max}} / ^\circ$                                                             | 27.520                                          | 25.701                                          |
| Reflections collected                                                                      | 30024                                           | 39425                                           |
| Independent reflections                                                                    | 1883                                            | 1558                                            |
| $R(\text{int})$                                                                            | 0.0670                                          | 0.1755                                          |
| No. Of parameters                                                                          | 103                                             | 103                                             |
| GOF                                                                                        | 1.098                                           | 1.070                                           |
| Final $R$ indices [ $I > 2\sigma(I)$ ]                                                     | $R_1 = 0.0247, wR_2 =$<br>0.0481                | $R_1 = 0.0386, wR_2 =$<br>0.0718                |
| $R$ indices (all data)                                                                     | $R_1 = 0.0382, wR_2 =$<br>0.0521                | $R_1 = 0.0715, wR_2 =$<br>0.0824                |
| $\Delta\rho_{\text{max}}, \Delta\rho_{\text{min}} / \text{e} \cdot 10^{-6} \text{pm}^{-3}$ | 1.160, -0.601                                   | 1.580, -0.905                                   |

## Interatomic Distances and Angles

**Table S7.** Selected interatomic distances (pm) and angles ( $^{\circ}$ ) of  ${}^2[\text{Eu}(\text{4-PyPz})_2(\text{Py})_2]$  (**4-Eu<sup>2+</sup>**). Symmetry operations: I  $x+1, y, z$  II  $-x+1, y+1/2, -z$ .

| Atoms                                 | ${}^2[\text{Eu}(\text{4-PyPz})_2(\text{Py})_2]$ | Atoms                                 | ${}^2[\text{Eu}(\text{4-PyPz})_2(\text{Py})_2]$ |
|---------------------------------------|-------------------------------------------------|---------------------------------------|-------------------------------------------------|
| Eu1-N1                                | 270.0(2)                                        | N3 <sup>I</sup> -Eu1-N4 <sup>II</sup> | 157.2(1)                                        |
| Eu1-N2 <sup>I</sup>                   | 256.8(4)                                        | N3 <sup>I</sup> -Eu1-N6               | 114.8(1)                                        |
| Eu1-N3 <sup>I</sup>                   | 264.1(2)                                        | N3 <sup>I</sup> -Eu1-N7               | 116.0(1)                                        |
| Eu1-N4 <sup>II</sup>                  | 272.8(2)                                        | N3 <sup>I</sup> -Eu1-N8               | 82.1(1)                                         |
| Eu1-N5                                | 254.9(4)                                        | N4 <sup>II</sup> -Eu1-N8              | 79.8(1)                                         |
| Eu1-N6                                | 268.0(4)                                        | N5-Eu1-N1                             | 85.4(1)                                         |
| Eu1-N7                                | 272.3(4)                                        | N5-Eu1-N2 <sup>I</sup>                | 90.4(1)                                         |
| Eu1-N8                                | 274.5(2)                                        | N5-Eu1-N3 <sup>I</sup>                | 86.6(1)                                         |
| N1-Eu1-N4 <sup>II</sup>               | 76.9(1)                                         | N5-Eu1-N4 <sup>II</sup>               | 108.6(1)                                        |
| N1-Eu1-N7                             | 153.1(1)                                        | N5-Eu1-N6                             | 30.2(1)                                         |
| N1-Eu1-N8                             | 85.0(1)                                         | N5-Eu1-N7                             | 107.1(1)                                        |
| N2 <sup>I</sup> -Eu1-N1               | 118.2(1)                                        | N5-Eu1-N8                             | 165.4(1)                                        |
| N2 <sup>I</sup> -Eu1-N3 <sup>I</sup>  | 30.3(1)                                         | N6-Eu1-N1                             | 97.0(1)                                         |
| N2 <sup>I</sup> -Eu1-N4 <sup>II</sup> | 157.3(1)                                        | N6-Eu1-N4 <sup>II</sup>               | 84.3(1)                                         |
| N2 <sup>I</sup> -Eu1-N6               | 108.9(2)                                        | N6-Eu1-N7                             | 84.4(1)                                         |
| N2 <sup>I</sup> -Eu1-N7               | 86.2(1)                                         | N6-Eu1-N8                             | 163.1(1)                                        |
| N2 <sup>I</sup> -Eu1-N8               | 84.5(2)                                         | N7-Eu1-N4 <sup>II</sup>               | 76.5(1)                                         |
| N3 <sup>I</sup> -Eu1-N1               | 87.9(1)                                         | N7-Eu1-N8                             | 86.3(1)                                         |

**Table S8.** Selected interatomic distances (pm) and angles ( $^{\circ}$ ) of  ${}^2[\text{Ln}_2(\text{4-PyPzH})_6] \cdot \text{Py}$ , Ln = Yb(**4-Yb**), Lu (**4-Lu**). Symmetry operations: I  $-x+1/2, y-1/2, -z+1/2$  II  $x, y-1, z$  III  $-x+1/2, y-1/2, -z+3/2$  IV  $x, y+1, z$

| Atoms                    | ${}^2[\text{Yb}(\text{4-PyPzH})_6] \cdot \text{Py}$ | ${}^2[\text{Lu}(\text{4-PyPzH})_6] \cdot \text{Py}$ | Atoms                     | ${}^2[\text{Yb}(\text{4-PyPzH})_6] \cdot \text{Py}$ | ${}^2[\text{Lu}(\text{4-PyPzH})_6] \cdot \text{Py}$ |
|--------------------------|-----------------------------------------------------|-----------------------------------------------------|---------------------------|-----------------------------------------------------|-----------------------------------------------------|
| Ln1-N7                   | 245(2)                                              | 245(1)                                              | N17-Ln1-N10 <sup>II</sup> | 83.9(2)                                             | 84.2(2)                                             |
| Ln1-N10 <sup>II</sup>    | 257.5(5)                                            | 256.7(4)                                            | N17-Ln1-N12               | 160.4(2)                                            | 159.8(2)                                            |
| Ln1-N11                  | 234.1(6)                                            | 234.0(4)                                            | N17-Ln1-N13 <sup>I</sup>  | 84.4(2)                                             | 84.3(2)                                             |
| Ln1-N12                  | 242.0(5)                                            | 240.2(5)                                            | N17-Ln1-N14               | 80.3(2)                                             | 79.9(2)                                             |
| Ln1-N13 <sup>I</sup>     | 247.5(5)                                            | 245.2(4)                                            | N17-Ln1-N15               | 80.9(2)                                             | 80.4(2)                                             |
| Ln1-N14                  | 239.9(6)                                            | 239.2(4)                                            | N18-Ln1-N7                | 78.5(4)                                             | 78.2(3)                                             |
| Ln1-N15                  | 238.2(6)                                            | 236.6(4)                                            | N18-Ln1-N10 <sup>II</sup> | 76.7(2)                                             | 76.5(2)                                             |
| Ln1-N17                  | 235.8(6)                                            | 235.1(4)                                            | N18-Ln1-N12               | 148.0(2)                                            | 146.9(2)                                            |
| Ln1-N18                  | 234.1(6)                                            | 234.6(5)                                            | N18-Ln1-N13 <sup>I</sup>  | 112.4(2)                                            | 113(2)                                              |
| Ln2-N1 <sup>IV</sup>     | 247.9(6)                                            | 244.5(4)                                            | N18-Ln1-N14               | 98.8(2)                                             | 99.2(2)                                             |
| Ln2-N2                   | 232.3(6)                                            | 232.6(4)                                            | N18-Ln1-N15               | 82.1(2)                                             | 82.1(2)                                             |
| Ln2-N3                   | 231.0(6)                                            | 231.5(5)                                            | N18-Ln1-N17               | 32.9(2)                                             | 33.9(2)                                             |
| Ln2-N4 <sup>III</sup>    | 245.4(5)                                            | 243.5(4)                                            | N2-Ln2-N1 <sup>IV</sup>   | 115.9(2)                                            | 116.5(2)                                            |
| Ln2-N5                   | 227.7(6)                                            | 228.0(4)                                            | N2-Ln2-N4 <sup>III</sup>  | 85.3(2)                                             | 85.1(2)                                             |
| Ln2-N6                   | 231.2(6)                                            | 231.9(5)                                            | N2-Ln2-N8                 | 108.4(5)                                            | 109.4(3)                                            |
| Ln2-N8                   | 237(2)                                              | 236(1)                                              | N2-Ln2-N9                 | 137.6(3)                                            | 139.4(5)                                            |
| Ln2-N9                   | 241(2)                                              | 243(1)                                              | N3-Ln2-N1 <sup>IV</sup>   | 83.1(2)                                             | 83.7(2)                                             |
| N7-Ln1-N10 <sup>II</sup> | 87.0(3)                                             | 86.7(3)                                             | N3-Ln2-N2                 | 34.3(2)                                             | 34.2(2)                                             |
| N7-Ln1-N13 <sup>I</sup>  | 154.0(3)                                            | 153.5(2)                                            | N3-Ln2-N4 <sup>III</sup>  | 116.8(2)                                            | 116.5(2)                                            |
| N11-Ln1-N7               | 81.5(4)                                             | 80.9(3)                                             | N3-Ln2-N6                 | 105.0(2)                                            | 104.2(2)                                            |

|                                         |          |          |                                         |          |          |
|-----------------------------------------|----------|----------|-----------------------------------------|----------|----------|
| N11-Ln1-N10 <sup>II</sup>               | 112.1(2) | 112.4(2) | N3-Ln2-N8                               | 92.8(5)  | 93.9(3)  |
| N11-Ln1-N12                             | 32.3(2)  | 33.4(2)  | N3-Ln2-N9                               | 125.7(4) | 126.9(4) |
| N11-Ln1-N13 <sup>I</sup>                | 89.9(2)  | 90.2(2)  | N4 <sup>III</sup> -Ln2-N1 <sup>IV</sup> | 158.5(2) | 158.0(2) |
| N11-Ln1-N14                             | 81.1(2)  | 80.9(2)  | N5-Ln2-N1 <sup>IV</sup>                 | 86.8(2)  | 86.5(2)  |
| N11-Ln1-N15                             | 86.2(2)  | 86.0(2)  | N5-Ln2-N2                               | 125.8(2) | 125.5(2) |
| N11-Ln1-N17                             | 160.8(2) | 160.3(2) | N5-Ln2-N3                               | 138.1(2) | 137.4(2) |
| N11-Ln1-N18                             | 157.7(2) | 156.8(2) | N5-Ln2-N4 <sup>III</sup>                | 83.1(2)  | 83.7(2)  |
| N12-Ln1-N7                              | 79.0(4)  | 78.5(3)  | N5-Ln2-N6                               | 34.8(2)  | 34.8(2)  |
| N12-Ln1-N10 <sup>II</sup>               | 79.8(2)  | 79(2)    | N5-Ln2-N8                               | 124.7(4) | 124.1(3) |
| N12-Ln1-N13 <sup>I</sup>                | 80.7(2)  | 80.5(2)  | N5-Ln2-N9                               | 92.2(4)  | 91.1(4)  |
| N13 <sup>I</sup> -Ln1-N10 <sup>II</sup> | 73.5(2)  | 73.7(2)  | N6-Ln2-N1 <sup>IV</sup>                 | 92.6(2)  | 92.2(2)  |
| N14-Ln1-N7                              | 115.8(3) | 116.0(3) | N6-Ln2-N2                               | 92.7(2)  | 92.5(2)  |
| N14-Ln1-N10 <sup>II</sup>               | 155.7(2) | 155.9(2) | N6-Ln2-N4 <sup>III</sup>                | 89.9(2)  | 90.9(2)  |
| N14-Ln1-N12                             | 111.3(2) | 112.0(2) | N6-Ln2-N8                               | 158.9(5) | 158.1(4) |
| N14-Ln1-N13 <sup>I</sup>                | 86.7(2)  | 86.7(2)  | N6-Ln2-N9                               | 127.0(3) | 125.9(4) |
| N15-Ln1-N7                              | 84.1(3)  | 84.8(2)  | N8-Ln2-N1 <sup>IV</sup>                 | 78.1(5)  | 77.4(4)  |
| N15-Ln1-N10 <sup>II</sup>               | 158.3(2) | 158.2(2) | N8-Ln2-N4 <sup>III</sup>                | 92.1(5)  | 91.9(4)  |
| N15-Ln1-N12                             | 117.7(2) | 118.7(2) | N8-Ln2-N9                               | 33.2(4)  | 33.5(3)  |
| N15-Ln1-N13 <sup>I</sup>                | 119.9(2) | 119.7(2) | N9-Ln2-N1 <sup>IV</sup>                 | 80.3(3)  | 78.5(5)  |
| N15-Ln1-N14                             | 33.5(2)  | 33.2(2)  | N9-Ln2-N4 <sup>III</sup>                | 81.1(3)  | 82.0(5)  |
| N17-Ln1-N7                              | 111.0(4) | 111.7(3) |                                         |          |          |

**Table S9.** Selected interatomic distances (pm) and angles (°) of  $[\text{Tm}(\text{4-PyPz})_3(\text{Py})]$  (**4- $\text{Zr}$ Tm**). Symmetry operations: I  $x-1/2, y+1/2, z$  II  $x+1/2, y+1/2, z$ .

| Atoms                                 | $[\text{Tm}(\text{4-PyPz})_3(\text{Py})]$ | Atoms                    | $[\text{Tm}(\text{4-PyPz})_3(\text{Py})]$ |
|---------------------------------------|-------------------------------------------|--------------------------|-------------------------------------------|
| Tm1-N1 <sup>II</sup>                  | 259.2(5)                                  | N5-Tm1-N4 <sup>I</sup>   | 117.2(2)                                  |
| Tm1-N2                                | 234.5(5)                                  | N5-Tm1-N10               | 85.3(2)                                   |
| Tm1-N3                                | 241.4(5)                                  | N6-Tm1-N1 <sup>II</sup>  | 158.9(2)                                  |
| Tm1-N4 <sup>I</sup>                   | 246.5(5)                                  | N6-Tm1-N3                | 117.6(2)                                  |
| Tm1-N5                                | 239.5(5)                                  | N6-Tm1-N4 <sup>I</sup>   | 85.3(2)                                   |
| Tm1-N6                                | 234.9(5)                                  | N6-Tm1-N5                | 33.5(2)                                   |
| Tm1-N8                                | 239.2(6)                                  | N6-Tm1-N8                | 80.5(2)                                   |
| Tm1-N9                                | 232.4(6)                                  | N6-Tm1-N10               | 118.4(2)                                  |
| Tm1-N10                               | 250.5(6)                                  | N8-Tm1-N1 <sup>II</sup>  | 82.9(2)                                   |
| N2-Tm1-N1 <sup>II</sup>               | 113.3(2)                                  | N8-Tm1-N3                | 161.2(2)                                  |
| N2-Tm1-N3                             | 32.8(2)                                   | N8-Tm1-N4 <sup>I</sup>   | 108.3(2)                                  |
| N2-Tm1-N4 <sup>I</sup>                | 82.4(2)                                   | N8-Tm1-N5                | 80.8(2)                                   |
| N2-Tm1-N5                             | 80.8(2)                                   | N8-Tm1-N10               | 84.2(2)                                   |
| N2-Tm1-N6                             | 85.4(2)                                   | N9-Tm1-N1 <sup>II</sup>  | 77.6(2)                                   |
| N2-Tm1-N8                             | 161.4(2)                                  | N9-Tm1-N2                | 155.4(2)                                  |
| N2-Tm1-N10                            | 91.9(2)                                   | N9-Tm1-N3                | 147.8(2)                                  |
| N3-Tm1-N1 <sup>II</sup>               | 80.5(2)                                   | N9-Tm1-N4 <sup>I</sup>   | 75.9(2)                                   |
| N3-Tm1-N4 <sup>I</sup>                | 79.9(2)                                   | N9-Tm1-N5                | 98.9(2)                                   |
| N3-Tm1-N10                            | 82.4(2)                                   | N9-Tm1-N6                | 81.4(2)                                   |
| N4 <sup>I</sup> -Tm1-N1 <sup>II</sup> | 87.6(2)                                   | N9-Tm1-N8                | 32.7(2)                                   |
| N4 <sup>I</sup> -Tm1-N10              | 155.3(2)                                  | N9-Tm1-N10               | 112.6(2)                                  |
| N5-Tm1-N1 <sup>II</sup>               | 153.6(2)                                  | N10-Tm1-N1 <sup>II</sup> | 72.5(2)                                   |
| N5-Tm1-N3                             | 111.0(2)                                  |                          |                                           |

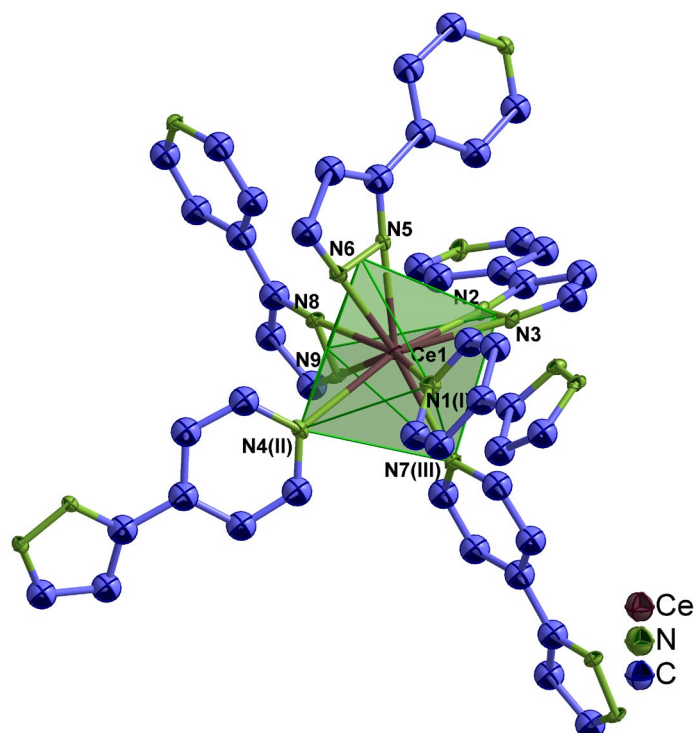

**Figure S1.** Extended coordination sphere of  $\text{Ce}^{3+}$  in  $[\text{Ce}(\text{4-PzPy})_3]$  (**4-Ce**) representing the series of isotopic framework compounds (**4**, Ln = La, Ce, Pr, Nd, Ho, Er, Tm). The coordination polyhedra around  $\text{Ce}^{3+}$  is indicated in green and the thermal ellipsoids describe a 50 % probability level of the atoms. Symmetry operations: I  $x+1/2, -y+1/2, z+1/2$  II  $-x+3/2, y-1/2, -z+3/2$  III  $x+1, y, z$

**Table S10.** Selected interatomic distances (pm) and angles ( $^\circ$ ) of  $[\text{Ln}(\text{4-PzPy})_3]$  (**4**, Ln = La, Ce, Pr, Nd, Ho, Er). Symmetry operations: I  $x+1/2, -y+1/2, z+1/2$  II  $-x+3/2, y-1/2, -z+3/2$  III  $x+1, y, z$

| Atoms                 | $[\text{La}(\text{4-PzPy})_3]$ | $[\text{Ce}(\text{4-PzPy})_3]$ | $[\text{Pr}(\text{4-PzPy})_3]$ | $[\text{Nd}(\text{4-PzPy})_3]$ | $[\text{Ho}(\text{4-PzPy})_3]$ | $[\text{Er}(\text{4-PzPy})_3]$ |
|-----------------------|--------------------------------|--------------------------------|--------------------------------|--------------------------------|--------------------------------|--------------------------------|
| Ln1-N2                | 251.0(3)                       | 248.2(3)                       | 246.3(2)                       | 244.8(2)                       | 236.0(4)                       | 235.2(3)                       |
| Ln1-N5                | 251.3(3)                       | 247.5(3)                       | 246.1(2)                       | 245.0(2)                       | 236.1(3)                       | 235.3(3)                       |
| Ln1-N8                | 251.2(3)                       | 248.1(3)                       | 246.4(2)                       | 245.5(2)                       | 236.9(4)                       | 235.9(4)                       |
| Ln1-N9                | 256.2(3)                       | 254.0(3)                       | 251.8(2)                       | 250.3(2)                       | 241.4(4)                       | 240.6(3)                       |
| Ln1-N6                | 256.8(3)                       | 254.3(3)                       | 252.3(2)                       | 251.2(2)                       | 242.8(4)                       | 241.4(3)                       |
| Ln1-N3                | 259.3(3)                       | 256.7(3)                       | 254.2(2)                       | 252.9(2)                       | 243.8(4)                       | 242.9(3)                       |
| Ln1-N1 <sup>I</sup>   | 267.7(4)                       | 264.9(3)                       | 263.3(2)                       | 262.1(2)                       | 253.3(3)                       | 251.8(3)                       |
| Ln1-N4 <sup>II</sup>  | 269.5(3)                       | 266.8(2)                       | 264.9(2)                       | 264.1(2)                       | 254.5(3)                       | 253.0(3)                       |
| Ln1-N7 <sup>III</sup> | 269.9(3)                       | 267.1(3)                       | 265.4(2)                       | 264.2(2)                       | 254.2(3)                       | 252.8(3)                       |
| N2-Ln1-N5             | 86.5(1)                        | 86.4(1)                        | 86.3(1)                        | 86.2(1)                        | 86.0(2)                        | 85.6(2)                        |
| N2-Ln1-N8             | 90.5(1)                        | 90.1(1)                        | 90.2(1)                        | 90.3(1)                        | 89.9(2)                        | 89.9(2)                        |
| N5-Ln1-N8             | 84.5(1)                        | 84.4(1)                        | 84.4(1)                        | 84.4(1)                        | 84.5(2)                        | 84.6(2)                        |
| N2-Ln1-N9             | 85.2(1)                        | 85.2(1)                        | 85.1(1)                        | 85.2(1)                        | 84.7(2)                        | 84.8(2)                        |
| N5-Ln1-N9             | 114.7(1)                       | 115(1)                         | 115.3(1)                       | 115.4(1)                       | 116.6(2)                       | 116.6(2)                       |
| N8-Ln1-N9             | 31.1(1)                        | 31.4(1)                        | 31.8(1)                        | 31.9(1)                        | 33.1(2)                        | 33.0(1)                        |
| N2-Ln1-N6             | 117.6(1)                       | 117.8(1)                       | 118.0(1)                       | 118.1(1)                       | 118.8(2)                       | 118.7(2)                       |
| N5-Ln1-N6             | 31.1(1)                        | 31.4(1)                        | 31.7(1)                        | 31.9(1)                        | 32.8(2)                        | 33.1(1)                        |
| N8-Ln1-N6             | 85.7(1)                        | 85.5(1)                        | 85.4(1)                        | 85.2(1)                        | 84.7(2)                        | 84.7(2)                        |
| N9-Ln1-N6             | 115.2(1)                       | 115.2(1)                       | 115.5(1)                       | 115.4(1)                       | 115.9(2)                       | 115.7(2)                       |
| N2-Ln1-N3             | 31.1(1)                        | 31.2(1)                        | 31.4(1)                        | 31.7(1)                        | 32.8(1)                        | 32.9(1)                        |
| N5-Ln1-N3             | 82.7(1)                        | 82.7(1)                        | 82.8(1)                        | 82.7(1)                        | 82.6(2)                        | 82.4(1)                        |

|                                         |          |          |          |          |          |          |
|-----------------------------------------|----------|----------|----------|----------|----------|----------|
| N8-Ln1-N3                               | 120.5(1) | 120.4(1) | 120.7(1) | 121.0(1) | 121.8(2) | 121.9(2) |
| N9-Ln1-N3                               | 114.9(1) | 115(1)   | 115.0(1) | 115.1(1) | 115.5(2) | 115.6(2) |
| N6-Ln1-N3                               | 108.9(1) | 109.2(1) | 109.4(1) | 109.6(1) | 110.4(2) | 110.4(1) |
| N2-Ln1-N1 <sup>I</sup>                  | 115.1(1) | 115(1)   | 115.2(1) | 115.2(1) | 115.5(2) | 115.4(2) |
| N5-Ln1-N1 <sup>I</sup>                  | 88.8(1)  | 88.3(1)  | 88.3(1)  | 88.2(1)  | 87.2(2)  | 87.0(1)  |
| N8-Ln1-N1 <sup>I</sup>                  | 153.1(1) | 153.4(1) | 153.0(1) | 152.9(1) | 152.6(2) | 152.6(2) |
| N9-Ln1-N1 <sup>I</sup>                  | 150.6(1) | 150.9(1) | 150.6(1) | 150.6(1) | 150.6(2) | 151.0(1) |
| N6-Ln1-N1 <sup>I</sup>                  | 75.5(1)  | 75.2(1)  | 75.0(1)  | 75.0(1)  | 74.4(2)  | 74.2(2)  |
| N3-Ln1-N1 <sup>I</sup>                  | 84.1(1)  | 83.8(1)  | 83.9(1)  | 83.6(1)  | 82.7(2)  | 82.5(1)  |
| N2-Ln1-N4 <sup>II</sup>                 | 156.1(1) | 156.2(1) | 155.6(1) | 155.5(1) | 154.9(2) | 155.1(1) |
| N5-Ln1-N4 <sup>II</sup>                 | 114.4(1) | 114.3(1) | 114.8(1) | 115.2(1) | 115.5(1) | 115.8(1) |
| N8-Ln1-N4 <sup>II</sup>                 | 80.7(1)  | 80.7(1)  | 80.5(1)  | 80.6(1)  | 80.2(2)  | 80.2(2)  |
| N9-Ln1-N4 <sup>II</sup>                 | 75.7(1)  | 75.5(1)  | 75.1(1)  | 75.1(1)  | 74.4(2)  | 74.4(1)  |
| N6-Ln1-N4 <sup>II</sup>                 | 84.1(1)  | 83.6(1)  | 83.9(1)  | 84.0(1)  | 83.4(2)  | 83.3(1)  |
| N3-Ln1-N4 <sup>II</sup>                 | 155.1(1) | 155.2(1) | 154.9(1) | 154.4(1) | 154.0(1) | 153.9(1) |
| N1 <sup>I</sup> -Ln1-N4 <sup>II</sup>   | 78.6(1)  | 79.0(1)  | 79.1(1)  | 79.0(1)  | 80.0(2)  | 80.2(1)  |
| N2-Ln1-N7 <sup>III</sup>                | 81.2(1)  | 81.1(1)  | 80.9(1)  | 80.9(1)  | 80.6(2)  | 80.8(1)  |
| N5-Ln1-N7 <sup>III</sup>                | 158(1)   | 158(1)   | 157.5(1) | 157.0(1) | 155.6(1) | 155.4(2) |
| N8-Ln1-N7 <sup>III</sup>                | 113.6(1) | 113.5(1) | 113.9(1) | 114.5(1) | 115.7(2) | 115.6(2) |
| N9-Ln1-N7 <sup>III</sup>                | 82.5(1)  | 82.1(1)  | 82.1(1)  | 82.6(1)  | 82.5(2)  | 82.6(2)  |
| N6-Ln1-N7 <sup>III</sup>                | 153.9(1) | 154.1(1) | 153.8(1) | 153.5(1) | 153.0(2) | 153.0(2) |
| N3-Ln1-N7 <sup>III</sup>                | 77.3(1)  | 77.2(1)  | 76.7(1)  | 76.3(1)  | 75.0(1)  | 75.0(1)  |
| N1 <sup>I</sup> -Ln1-N7 <sup>III</sup>  | 80.2(1)  | 80.8(1)  | 80.6(1)  | 80.2(1)  | 80.3(2)  | 80.6(2)  |
| N4 <sup>II</sup> -Ln1-N7 <sup>III</sup> | 82.2(1)  | 82.5(1)  | 82.3(1)  | 82.3(1)  | 83.0(1)  | 83.0(1)  |

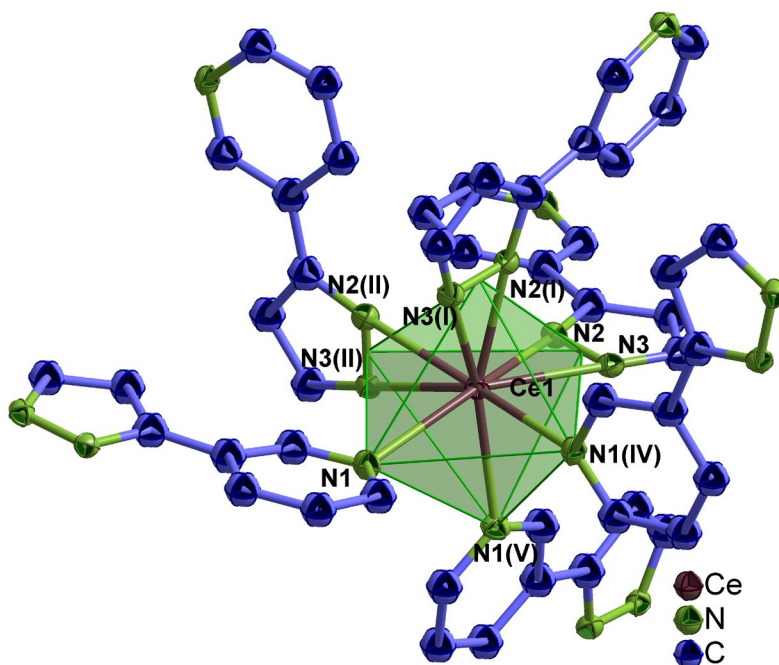

**Figure S2.** Extended coordination sphere of  $\text{Ce}^{3+}$  in  $[\text{Ce}(\text{3-PyPz})_3]$  (**3-Ce**) representing the series of isotopic framework compounds (**3**, Ln = Ce, Pr, Nd, Ho, Er, Tm). The coordination polyhedra around  $\text{Ce}^{3+}$  is indicated in green and the thermal ellipsoids describe a 50 % probability level of the atoms. Symmetry operations: I  $-z+1, x+1/2, -y+3/2$  II  $y-1/2, -z+3/2, -x+1$  III  $x-1/2, y, -z+3/2$  IV  $y-1/2, z, -x+3/2$  V  $z-1/2, x, -y+3/2$ .



**Table S11.** Selected interatomic distances (pm) and angles (°) of  $[\text{Ln}(\text{3-PyPz})_3]$ , (**3**, Ln = Ce, Pr, Nd, Ho, Er, Tm).  
Symmetry operations: I  $-z+1, x+1/2, -y+3/2$  II  $y-1/2, -z+3/2, -x+1$  III  $x-1/2, y, -z+3/2$  IV  $y-1/2, z, -x+3/2$  V  $z-1/2, x, -y+3/2$ .

| Atoms                                   | $[\text{Ce}(\text{3-PyPz})_3]$ | $[\text{Pr}(\text{3-PyPz})_3]$ | $[\text{Nd}(\text{3-PyPz})_3]$ | $[\text{Ho}(\text{3-PyPz})_3]$ | $[\text{Er}(\text{3-PyPz})_3]$ | $[\text{Tm}(\text{3-PyPz})_3]$ |
|-----------------------------------------|--------------------------------|--------------------------------|--------------------------------|--------------------------------|--------------------------------|--------------------------------|
| Ln1-N2                                  | 246.6(3)                       | 245.0(2)                       | 243.5(2)                       | 235.2(2)                       | 234.2(2)                       | 233.6(5)                       |
| Ln1-N3                                  | 252.7(3)                       | 250.3(2)                       | 249.0(2)                       | 239.8(2)                       | 238.6(2)                       | 238.3(5)                       |
| Ln1-N1 <sup>III</sup>                   | 268.7(3)                       | 267.1(2)                       | 265.4(2)                       | 256.0(2)                       | 255.0(2)                       | 254.2(5)                       |
| N2-Ln1-N2 <sup>I</sup>                  | 85.6(1)                        | 85.5(1)                        | 85.6(1)                        | 85.8(1)                        | 85.8(1)                        | 86.0(2)                        |
| N2-Ln1-N3                               | 31.9(1)                        | 32.1(1)                        | 32.3(1)                        | 33.3(1)                        | 33.5(1)                        | 33.4(2)                        |
| N2 <sup>I</sup> -Ln1-N3                 | 82.6(1)                        | 82.6(1)                        | 82.8(1)                        | 83.0(1)                        | 82.9(1)                        | 83.0(2)                        |
| N2 <sup>II</sup> -Ln1-N3                | 116.9(1)                       | 117.0(1)                       | 117.3(1)                       | 118.6(1)                       | 118.7(1)                       | 118.8(2)                       |
| N3-Ln1-N3 <sup>II</sup>                 | 112.3(1)                       | 112.5(1)                       | 112.7(1)                       | 113.5(1)                       | 113.7(1)                       | 113.6(1)                       |
| N2-Ln1-N1 <sup>III</sup>                | 161.3(1)                       | 161.2(1)                       | 161.4(1)                       | 161.6(1)                       | 161.6(1)                       | 161.9(2)                       |
| N2 <sup>I</sup> -Ln1-N1 <sup>III</sup>  | 109.7(1)                       | 109.9(1)                       | 109.7(1)                       | 109.4(1)                       | 109.4(1)                       | 109.0(2)                       |
| N2 <sup>II</sup> -Ln1-N1 <sup>III</sup> | 84.9(1)                        | 85.1(1)                        | 85.1(1)                        | 85.0(1)                        | 85.0(1)                        | 85.0(2)                        |
| N3-Ln1-N1 <sup>III</sup>                | 156.4(1)                       | 156.0(1)                       | 155.7(1)                       | 154.7(1)                       | 154.6(1)                       | 154.7(2)                       |
| N3 <sup>II</sup> -Ln1-N1 <sup>III</sup> | 80.8(1)                        | 80.8(1)                        | 80.8(1)                        | 80.6(1)                        | 80.6(1)                        | 80.8(2)                        |
| N3 <sup>I</sup> -Ln1-N1 <sup>III</sup>  | 77.7(1)                        | 77.8(1)                        | 77.4(1)                        | 76.0(1)                        | 75.9(1)                        | 75.6(2)                        |
| N1 <sup>III</sup> -Ln1-N1 <sup>IV</sup> | 83.2(1)                        | 82.9(1)                        | 82.8(1)                        | 83.0(1)                        | 83.0(1)                        | 83.1(2)                        |

## Powder Diffraction

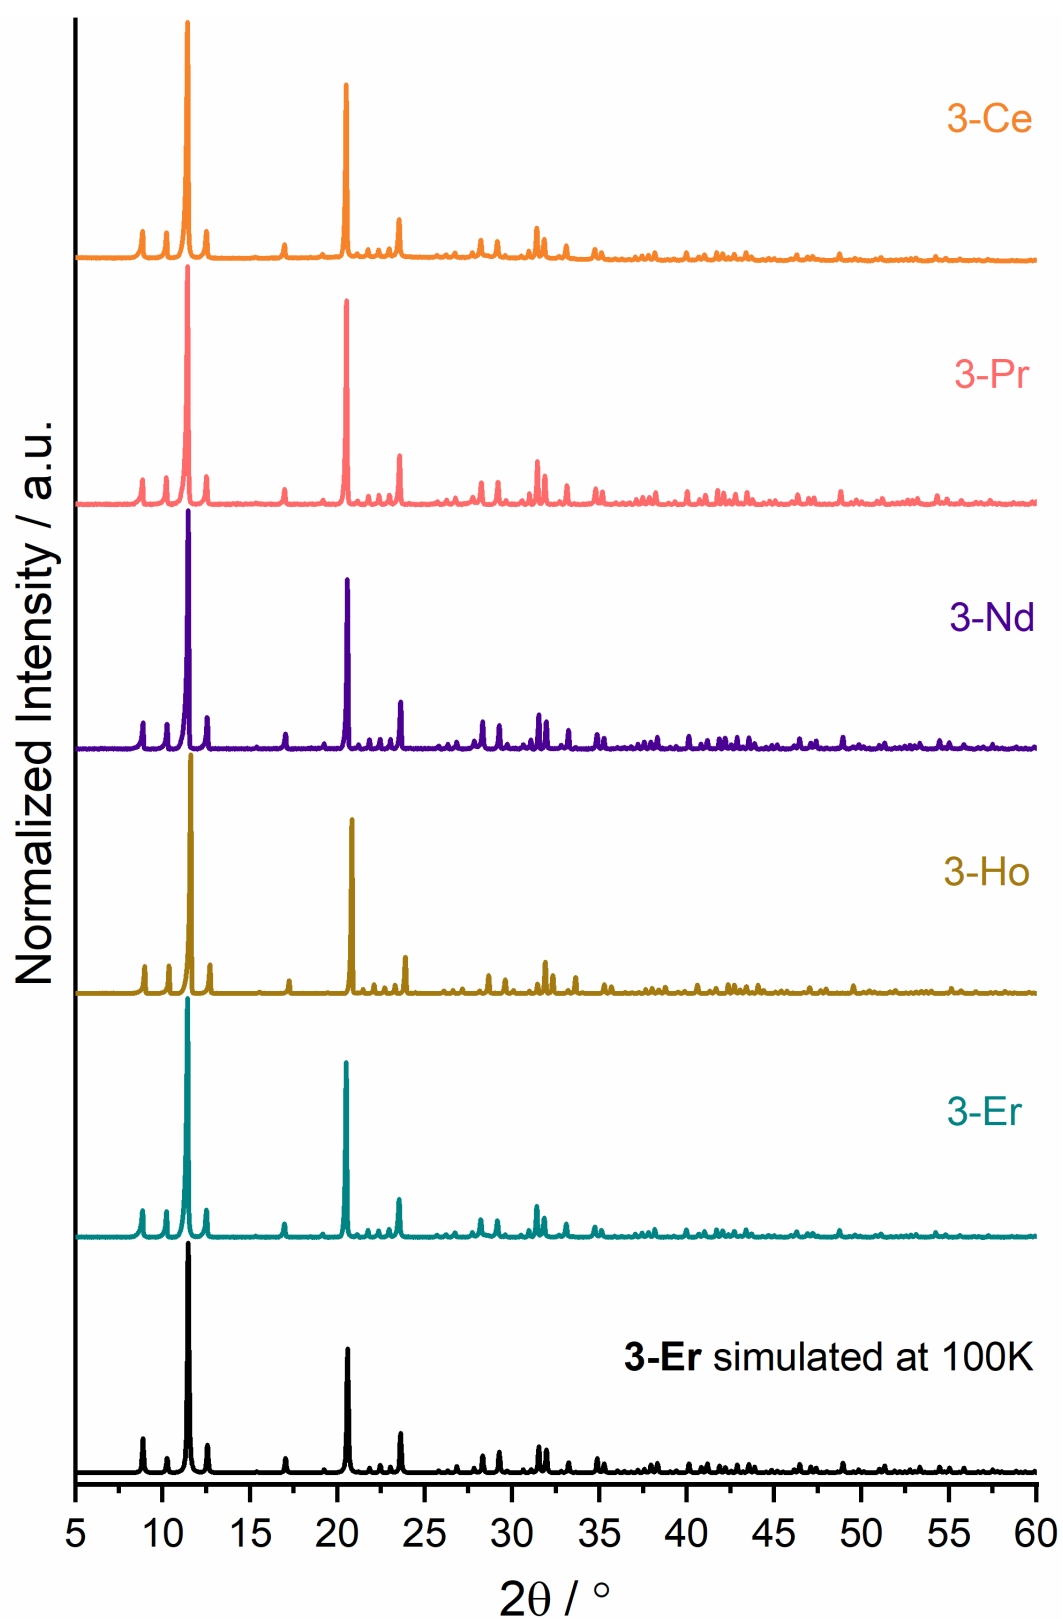

**Figure S3.** Comparison of the experimental X-ray powder diffraction pattern of  $\text{[Ln(3-PyPz)}_3\text{]}_3$  (**3**, Ln = Pr, Nd, Ho, Er, Tm) at RT with the simulated pattern from the single-crystal X-ray data of  $\text{[Er(3-PyPz)}_3\text{]}_3$  (**3-Er**) at 100 K.

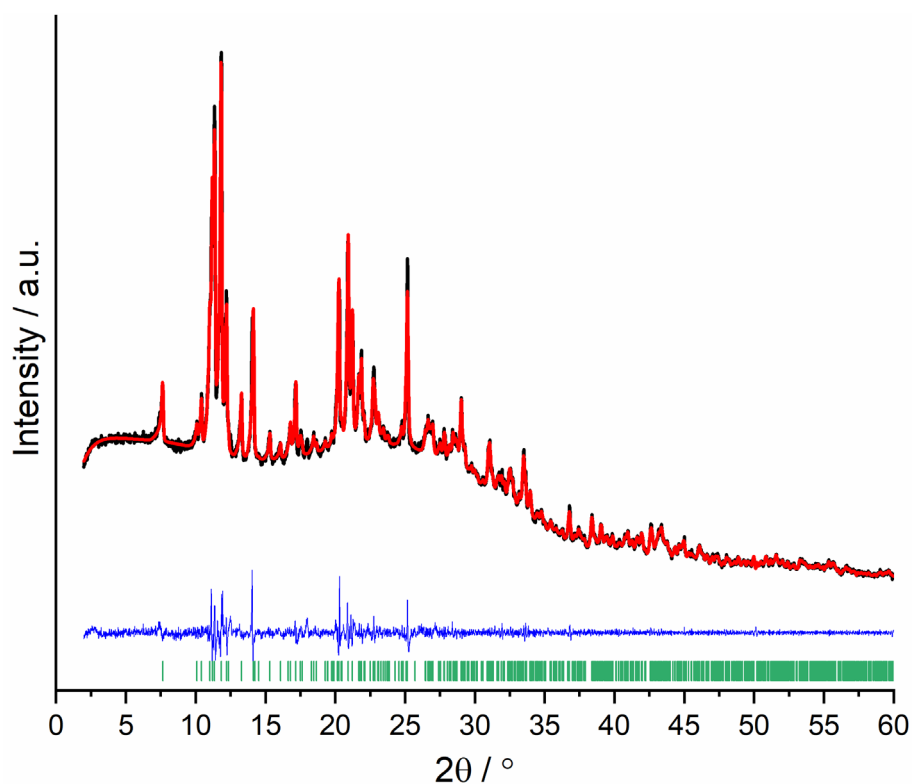

**Figure S4.** Pawley refinement results for PXRd of  $3[\text{La}(\text{4-PyPz})_3]$  (**4-La**), showing the experimental data (black) together with the Pawley fit (red), the corresponding difference plot (blue) as well as hkl position markers (green).

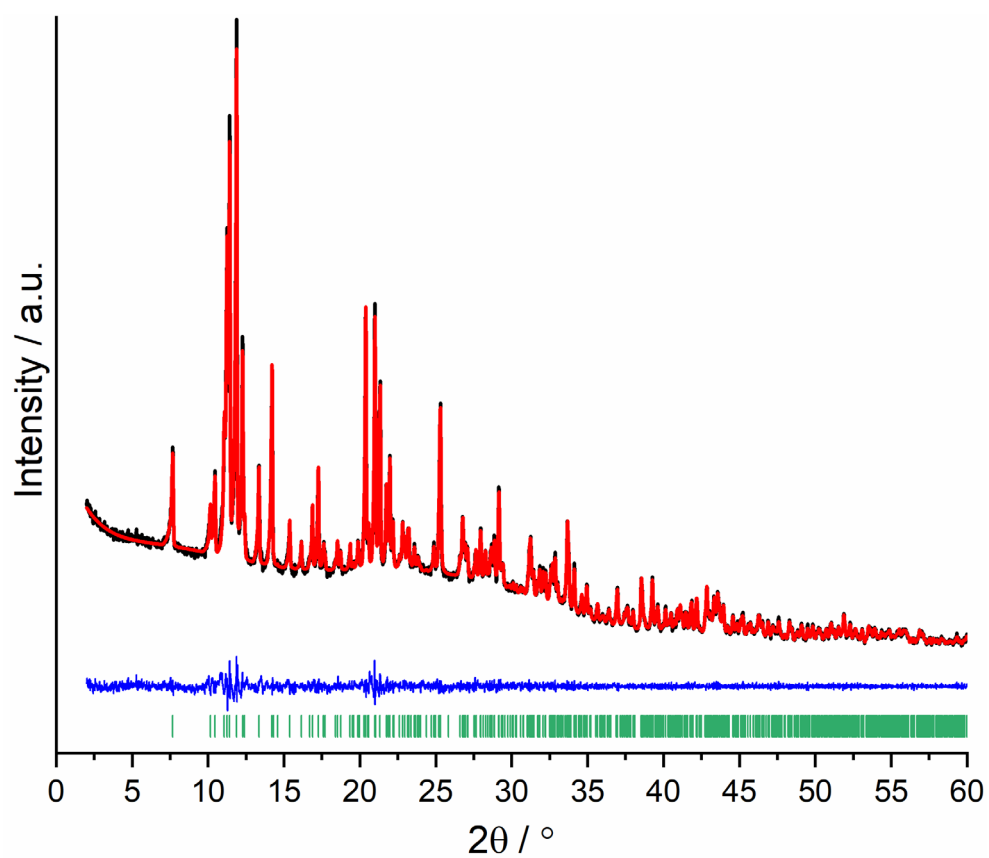

**Figure S5.** Pawley refinement results for PXRd of  $3[\text{Pr}(\text{4-PyPz})_3]$  (**4-Pr**), showing the experimental data (black) together with the Pawley fit (red), the corresponding difference plot (blue) as well as hkl position markers (green).

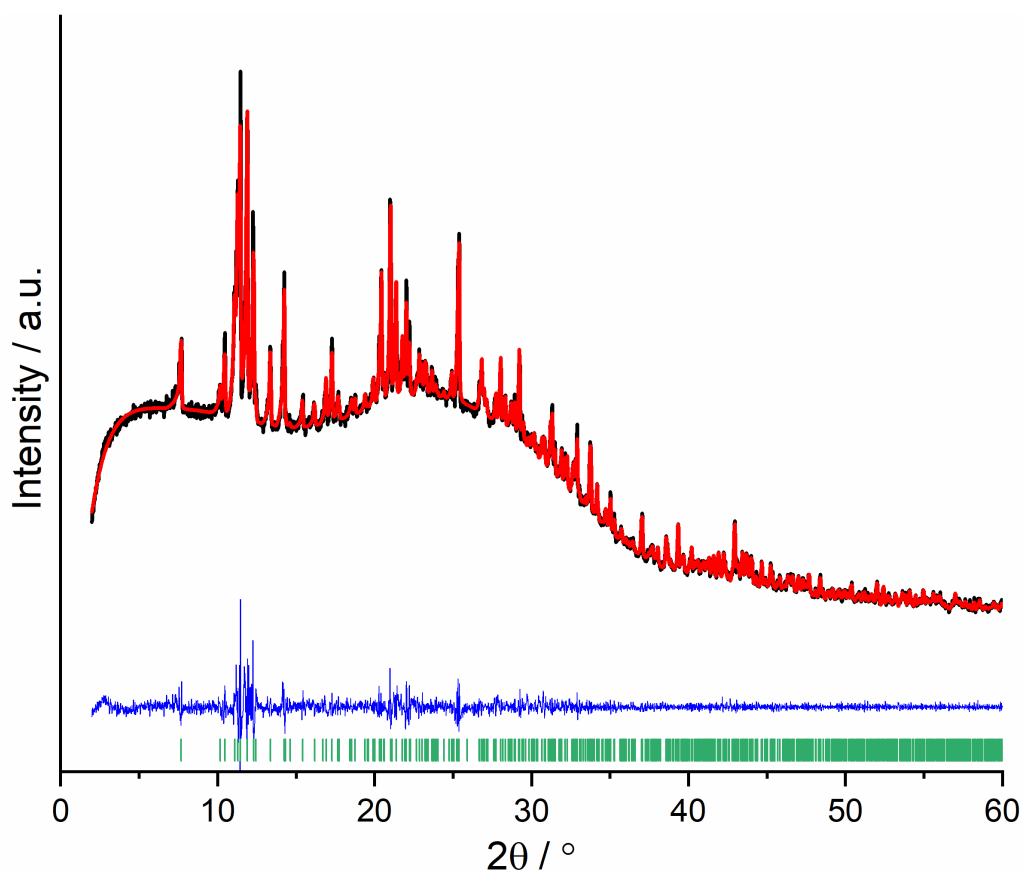

**Figure S6.** Pawley refinement results for PXRD of  ${}^3[\text{Nd}(\text{4-PyPz})_3]$  (**4-Nd**), showing the experimental data (black) together with the Pawley fit (red), the corresponding difference plot (blue) as well as hkl position markers (green).

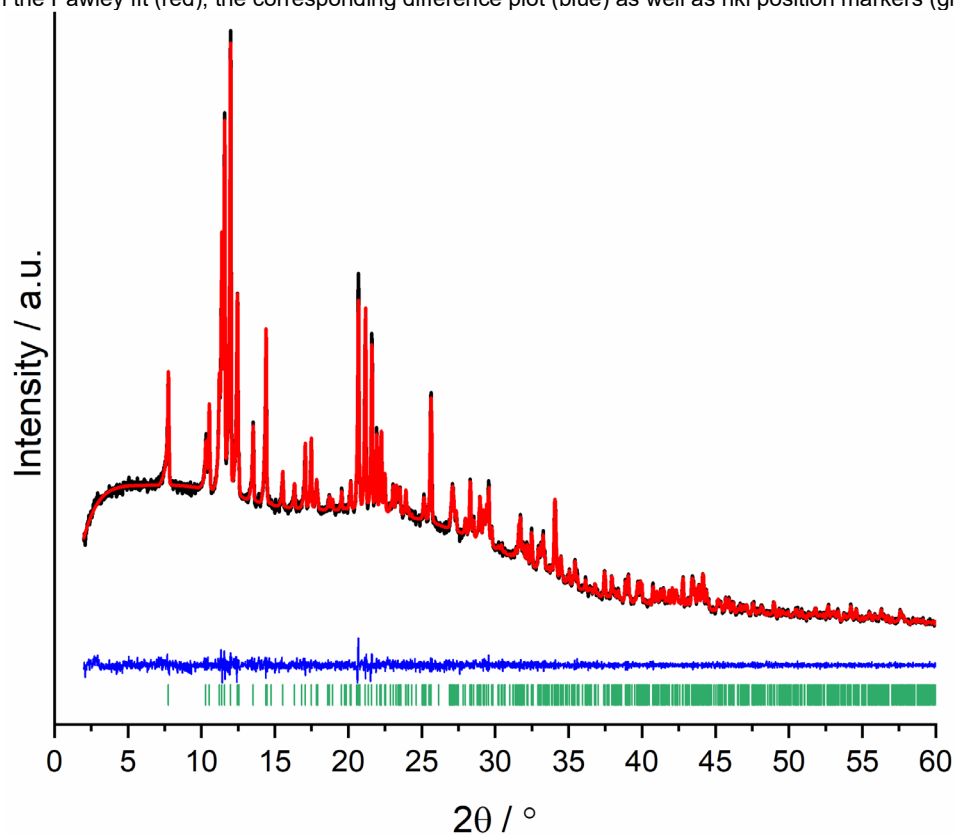

**Figure S7.** Pawley refinement results for PXRD of  ${}^3[\text{Ho}(\text{4-PyPz})_3]$  (**4-Ho**), showing the experimental data (black) together with the Pawley fit (red), the corresponding difference plot (blue) as well as hkl position markers (green).

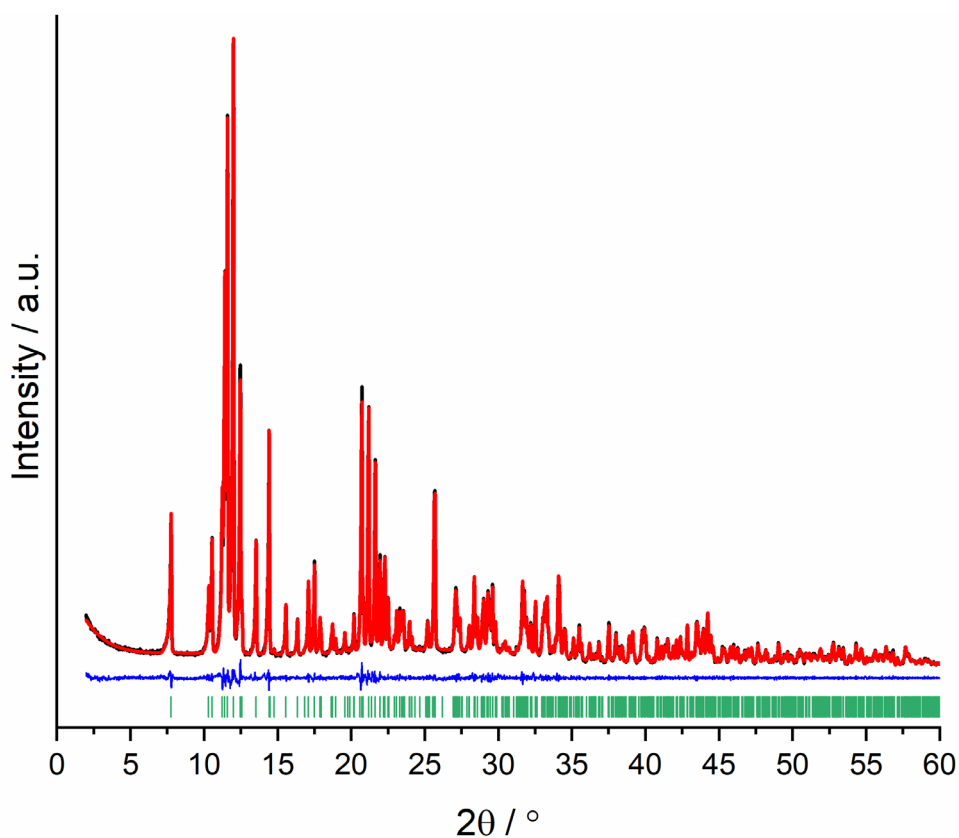

**Figure S8.** Pawley refinement results for PXRD of  ${}^3[\text{Er}(\text{4-PyPz})_3]$  (**4-Er**), showing the experimental data (black) together with the Pawley fit (red), the corresponding difference plot (blue) as well as hkl position markers (green).

**Table S12.** Pawley refinement results for  ${}^2[\text{Eu}(\text{4-PyPz})_2(\text{Py})_2]$  (**4-Eu<sup>2+</sup>**),  ${}^2[\text{Ce}(\text{4-PyPz})_3(\text{Py})]$  (**4-<sup>2</sup>Ce**), and  ${}^3[\text{Ln}(\text{4-PyPz})_3]$  (**4**, Ln = La, Pr, Nd, Ho, Er, Tm).

| Compound        | ${}^2[\text{Eu}(\text{4-PyPz})_2(\text{Py})_2]$ | ${}^2[\text{Ce}(\text{4-PyPz})_3(\text{Py})]$ | ${}^3[\text{La}(\text{4-PyPz})_3]$ | ${}^3[\text{Pr}(\text{4-PyPz})_3]$ |
|-----------------|-------------------------------------------------|-----------------------------------------------|------------------------------------|------------------------------------|
| $R_{\text{wp}}$ | 2.7359                                          | 4.3334                                        | 2.3996                             | 2.4706                             |
| GOF             | 1.3696                                          | 1.0395                                        | 1.6364                             | 1.0812                             |
| Compound        | ${}^3[\text{Nd}(\text{4-PyPz})_3]$              | ${}^3[\text{Ho}(\text{4-PyPz})_3]$            | ${}^3[\text{Er}(\text{4-PyPz})_3]$ | ${}^3[\text{Tm}(\text{4-PyPz})_3]$ |
| $R_{\text{wp}}$ | 2.1610                                          | 2.0778                                        | 3.7015                             | 2.8265                             |
| GOF             | 1.7183                                          | 1.0298                                        | 1.2168                             | 1.5827                             |

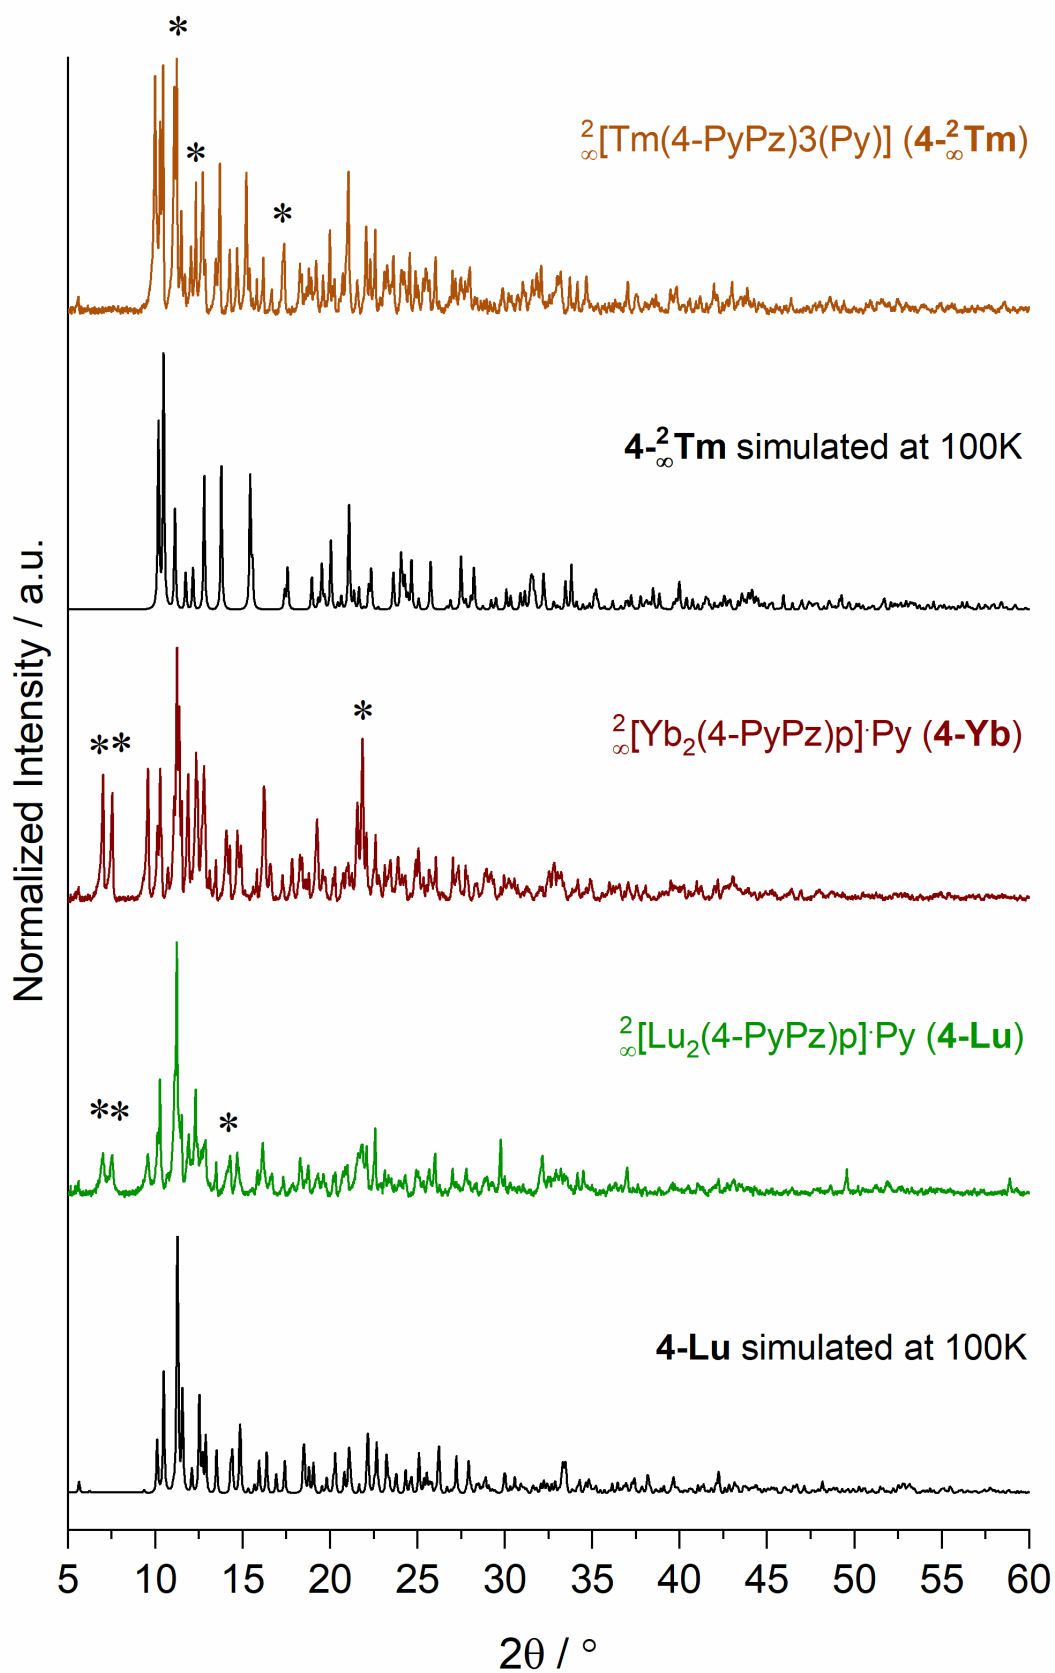

**Figure S9.** Comparison of the experimental X-ray powder diffraction pattern of  ${}^2_{\infty}[\text{Tm}(\text{4-PyPz})_3(\text{Py})] \text{ (4-}^2\text{Tm)}$ ,  ${}^2_{\infty}[\text{Ln}_2(\text{4-PyPz})_6]\cdot\text{Py}$ ,  $\text{Ln} = \text{Yb} \text{ (4-Yb)}$  and  $\text{Lu} \text{ (4-Lu)}$  at RT with the respective simulated pattern from single-crystal X-ray data at 100 K.

### Photophysical Properties

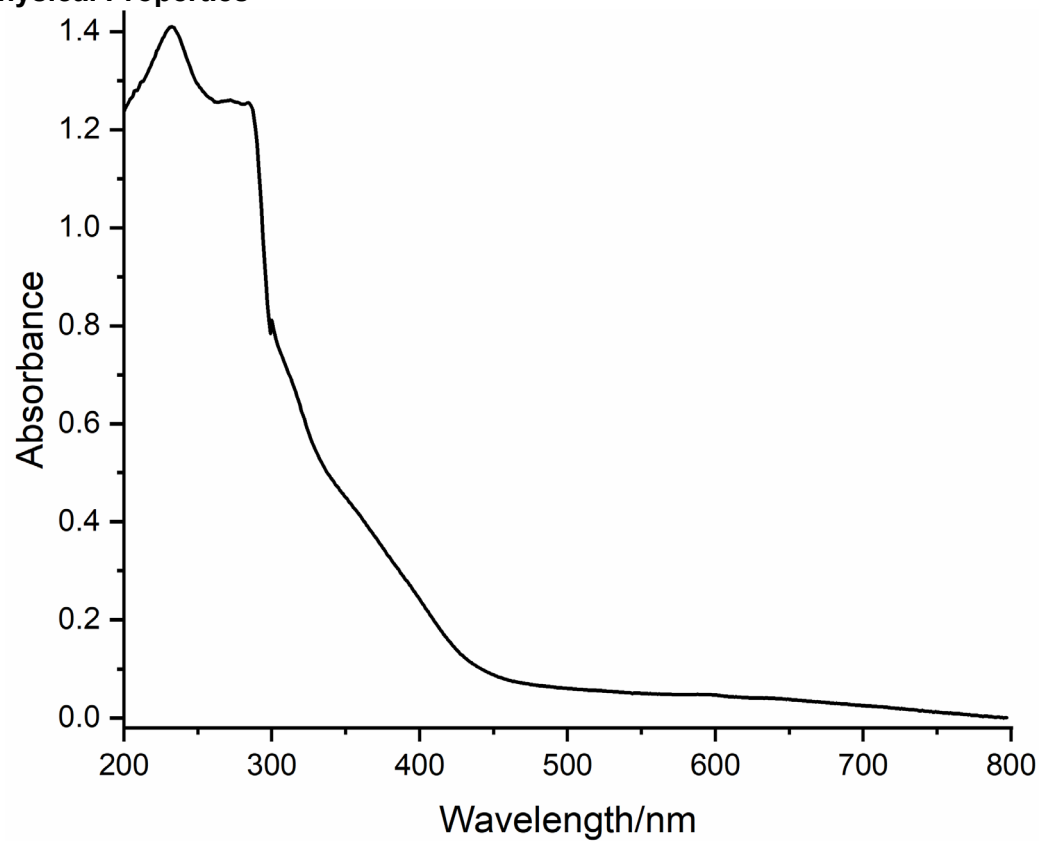

**Figure S10.** Absorption spectra of **4-PyPzH** in the solid state at room temperature.

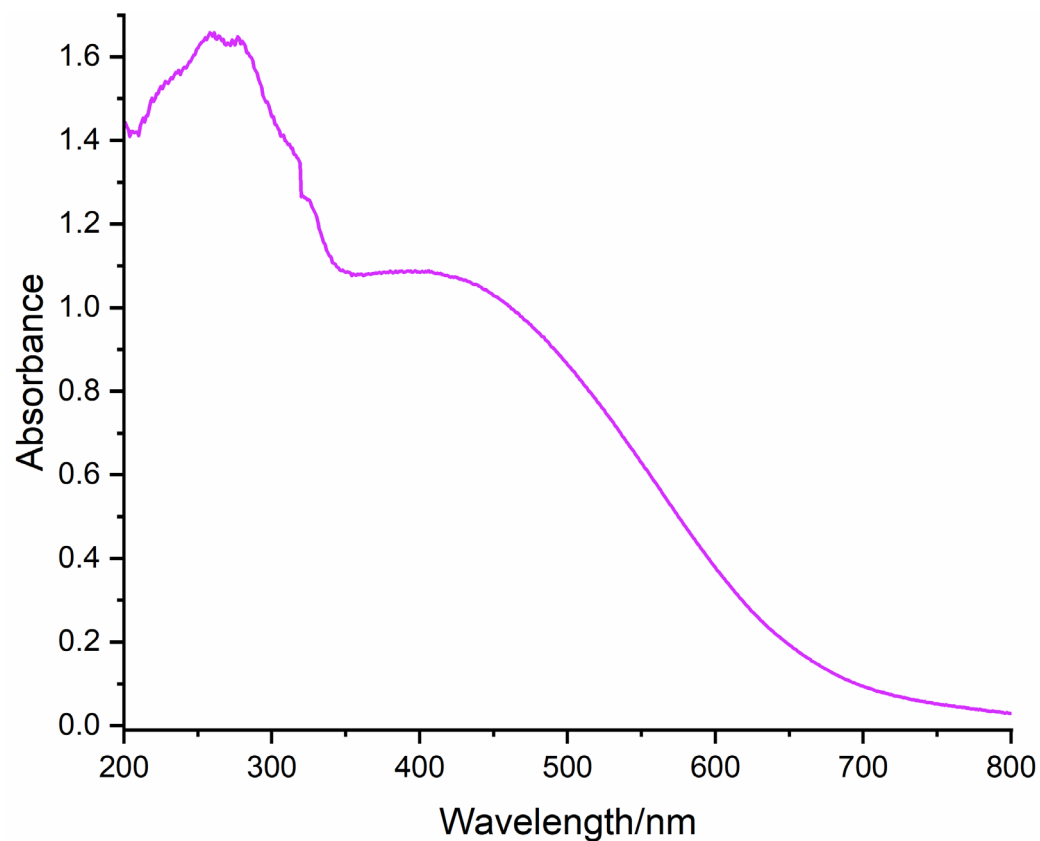

**Figure S11.** Absorption spectra of  $[Eu(4-PyPz)_2(Py)_2]$  (**4-Eu<sup>2+</sup>**) in the solid state at room temperature.

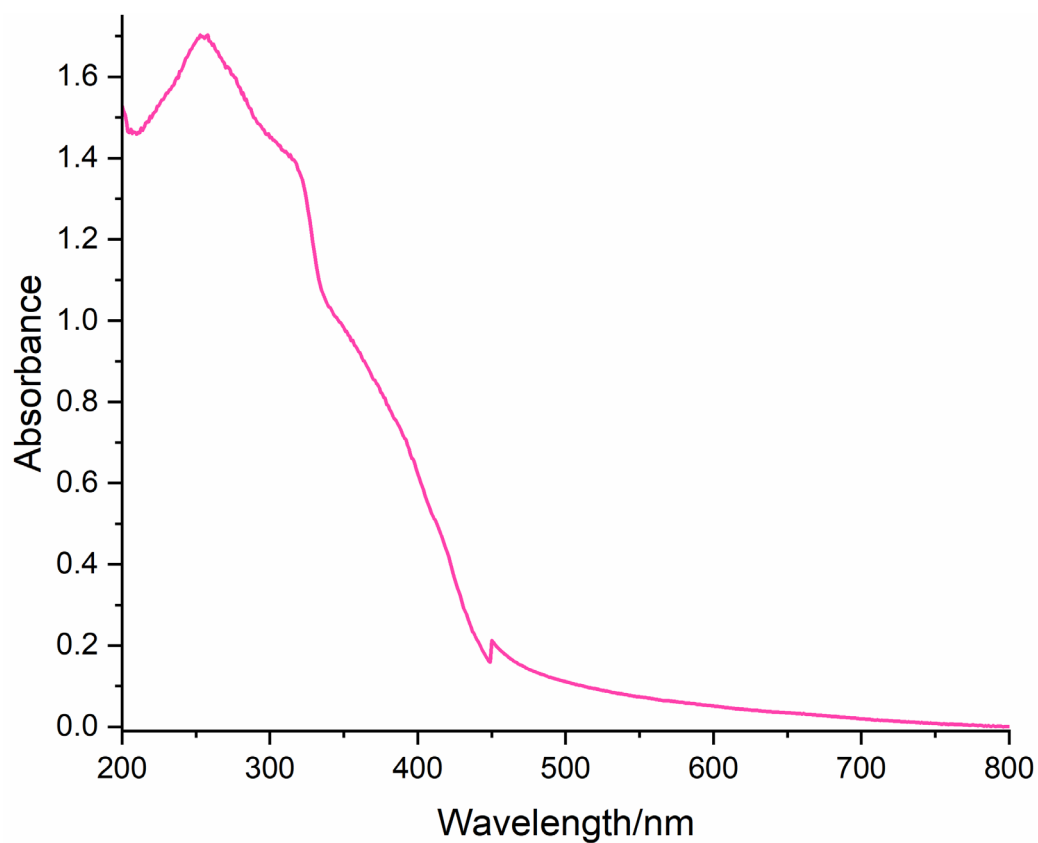

**Figure S12.** Absorption spectra of  $[Ce(4-PyPz)_3(Py)]$  (**4-Ce**) in the solid state at room temperature.

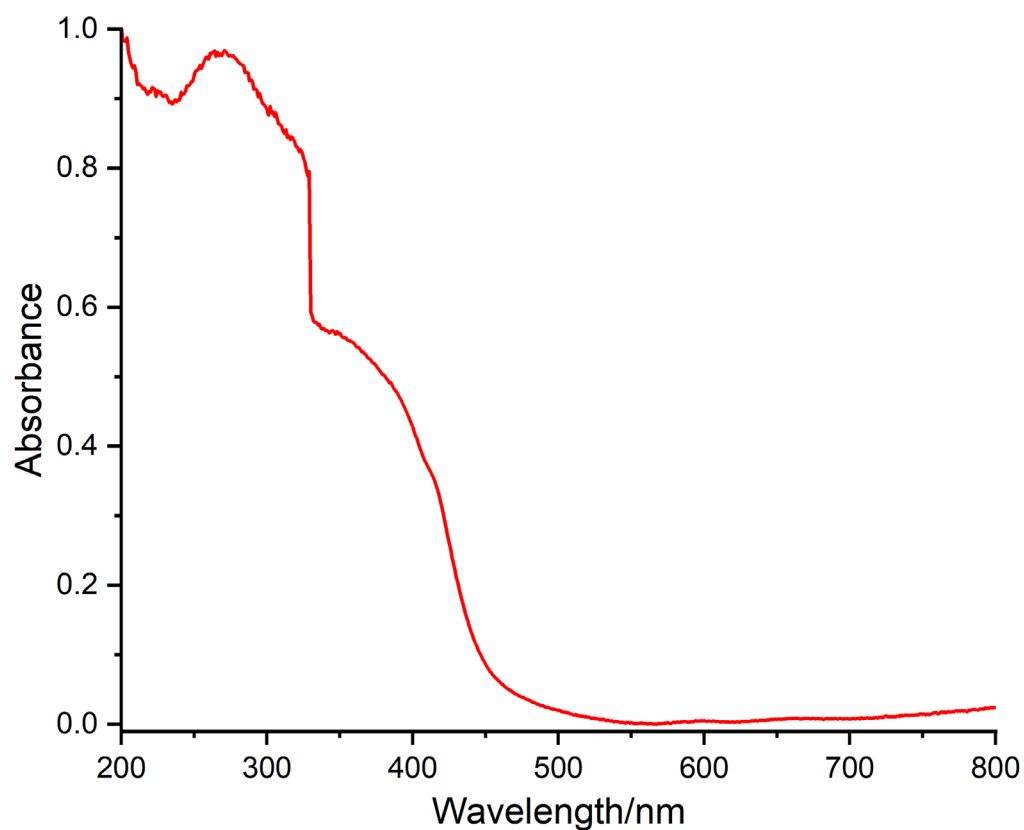

**Figure S13.** Absorption spectra of  $[Ce(4-PyPz)_3]$  (**4-Ce**) in the solid state at room temperature.



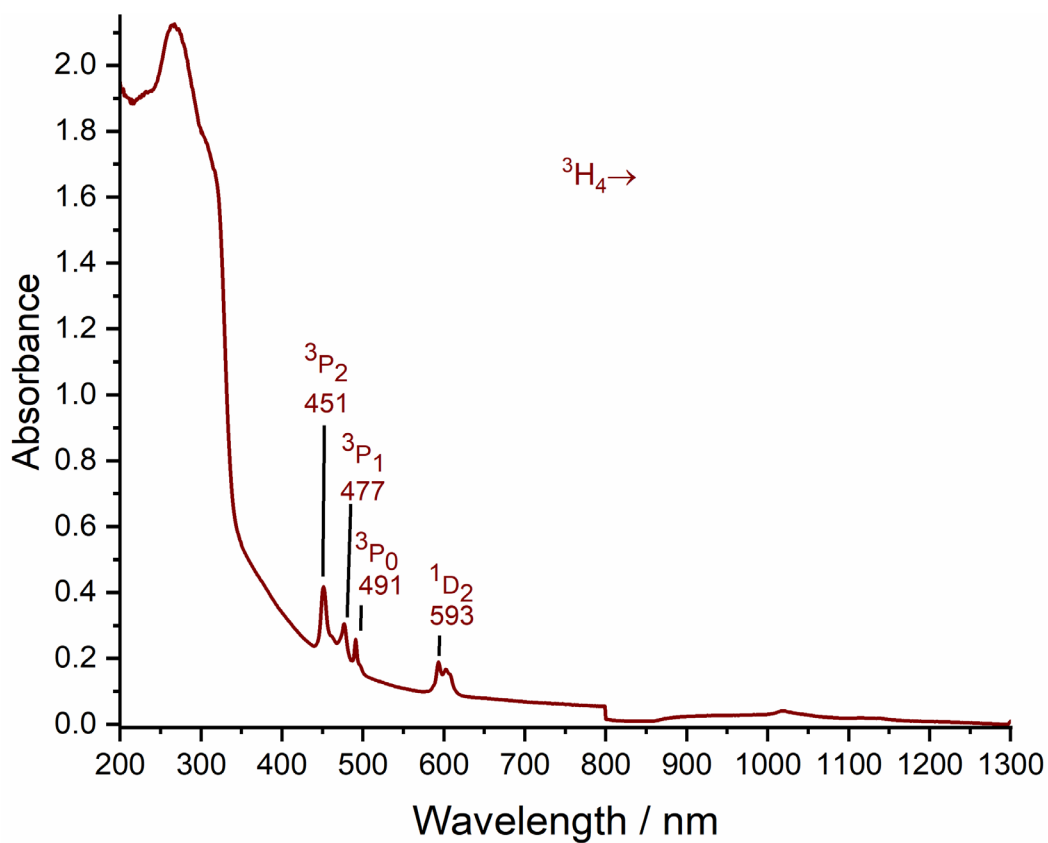

**Figure S14.** Absorption spectra of  ${}^3[\text{Pr}(\text{4-PyPz})_3]$  (**4-Pr**) in the solid state at room temperature.

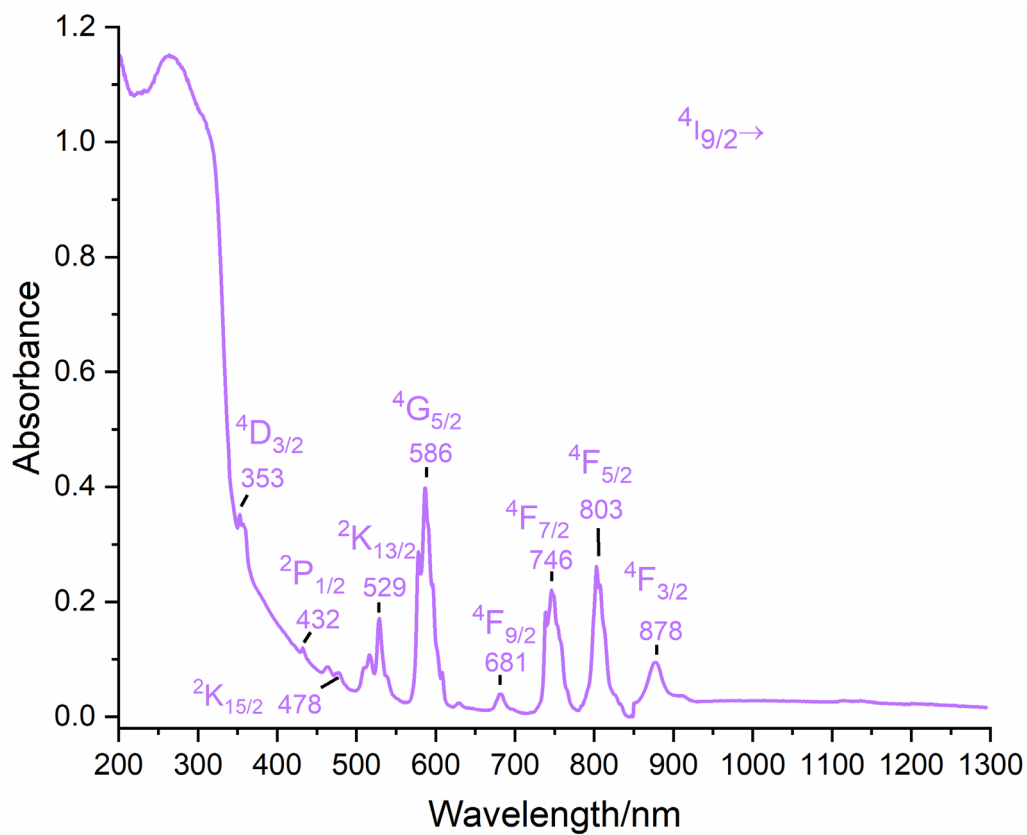

**Figure S15.** Absorption spectra of  ${}^3[\text{Nd}(\text{4-PyPz})_3]$  (**4-Nd**) in the solid state at room temperature.

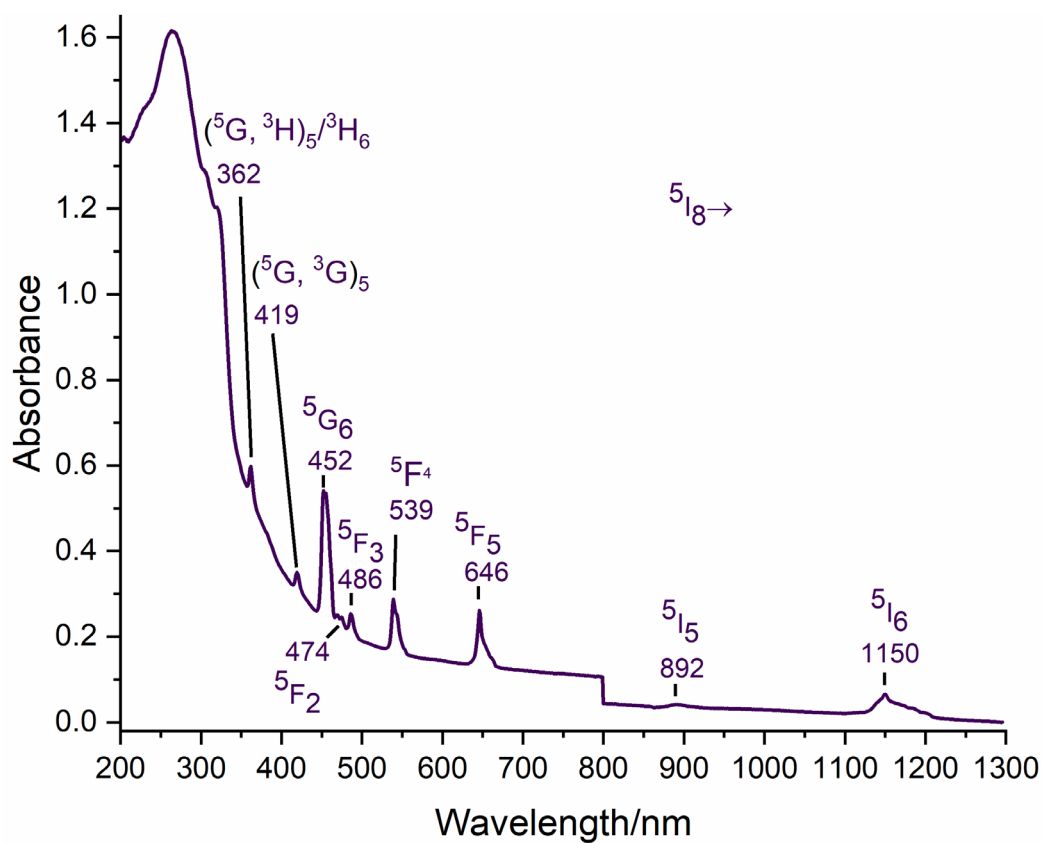

**Figure S16.** Absorption spectra of  $3[\text{Ho}(\text{4-PyPz})_3]$  (**4-Ho**) in the solid state at room temperature.

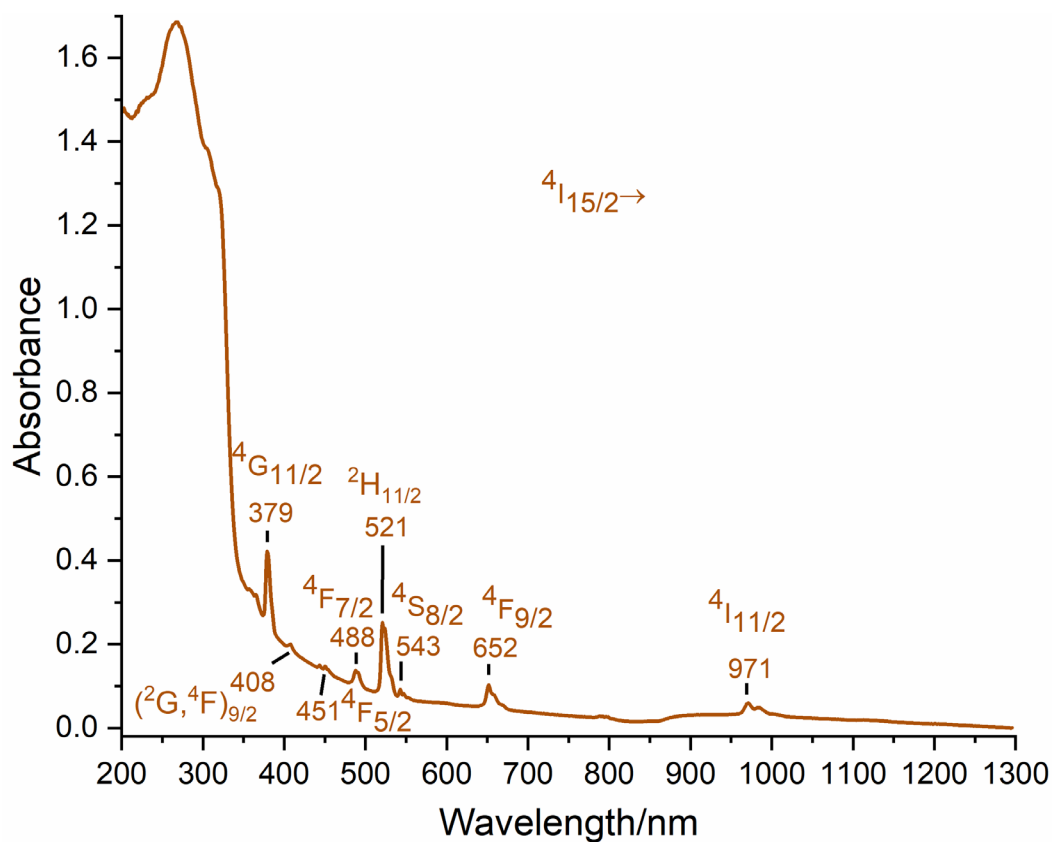

**Figure S17.** Absorption spectra of  $3[\text{Er}(\text{4-PyPz})_3]$  (**4-Er**) in the solid state at room temperature.

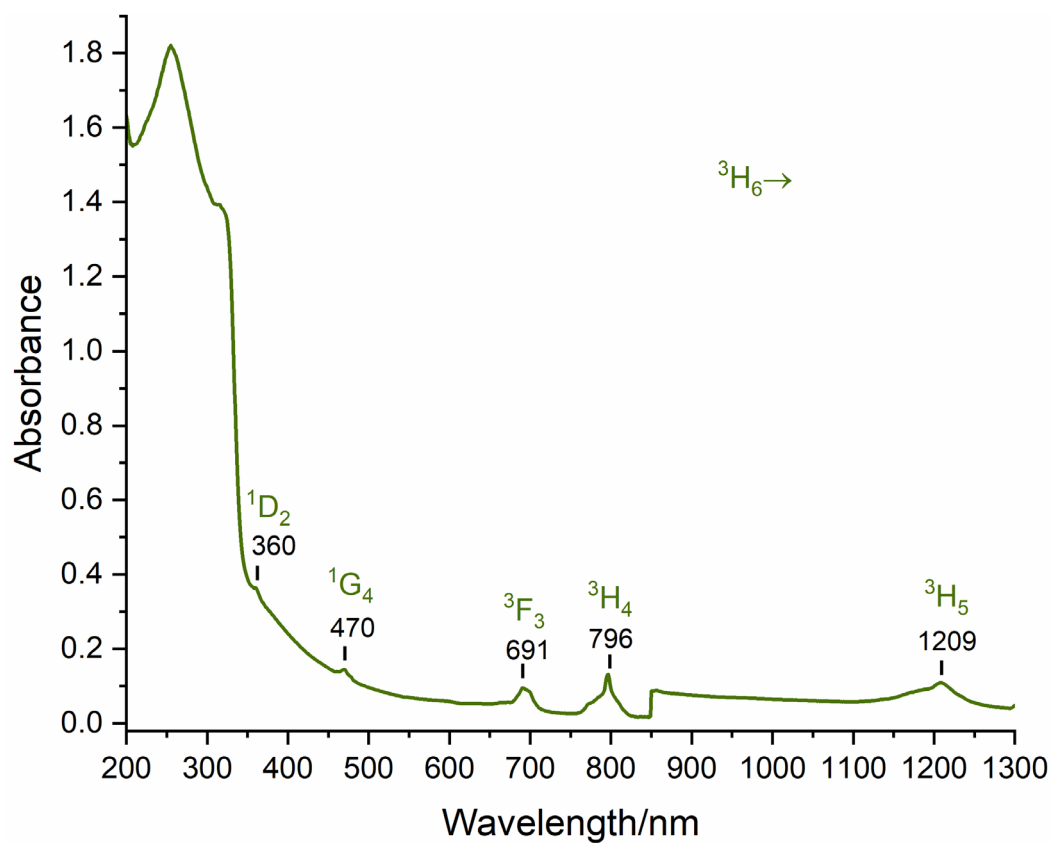

**Figure S18.** Absorption spectra of  ${}^3[\text{Tm}(\text{4-PyPz})_3]$  (**4-Tm**) in the solid state at room temperature.

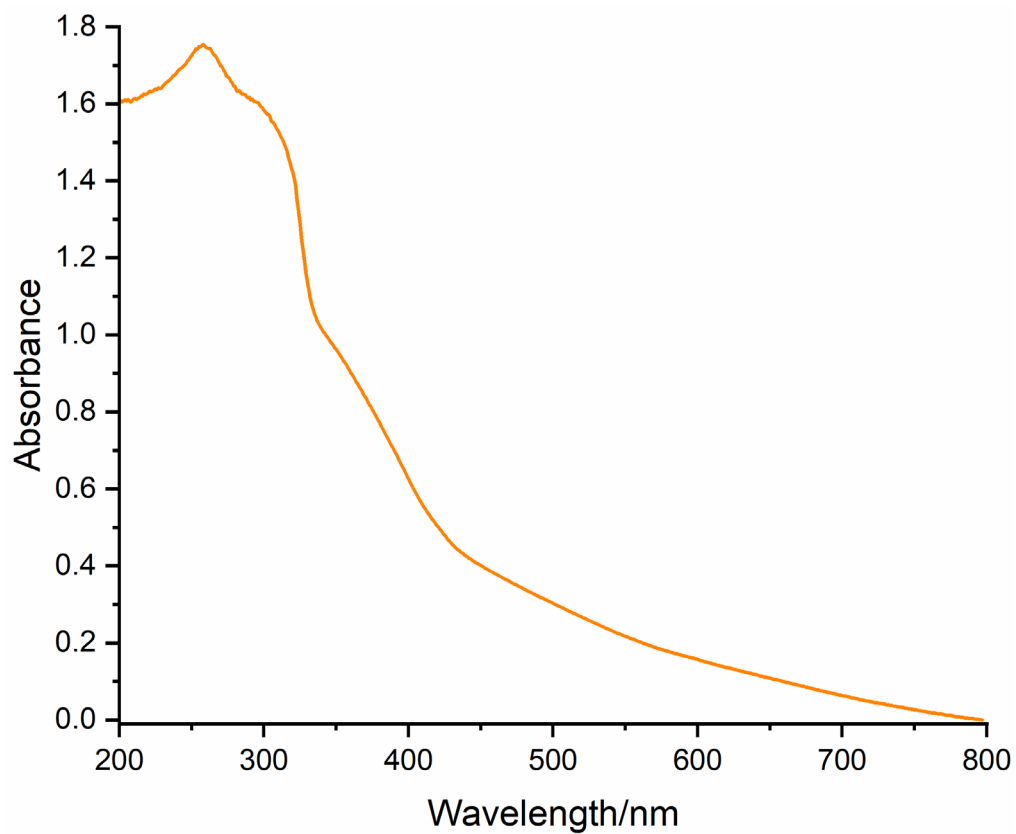

**Figure S19.** Absorption spectra of  ${}^3[\text{Ce}(\text{3-PyPz})_3]$  (**3-Ce**) in the solid state at room temperature.

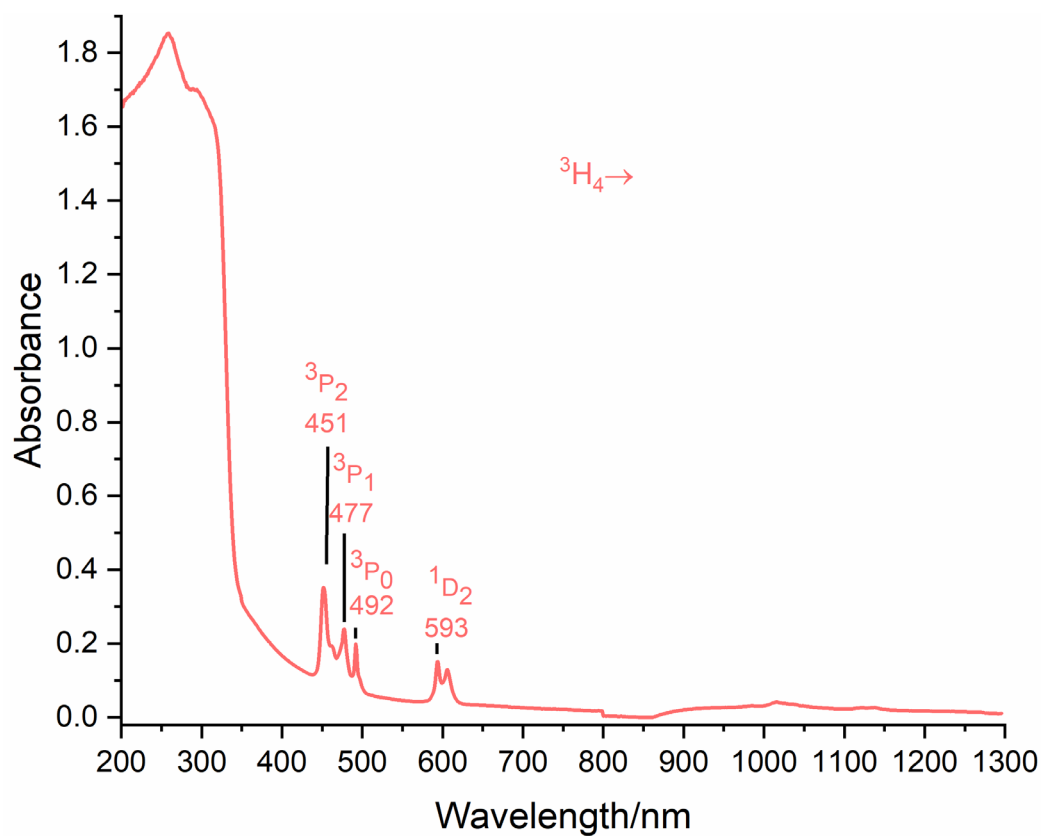

Figure S20. Absorption spectra of  $^3[Pr(3-PyPz)_3]$  (**3-Pr**) in the solid state at room temperature.

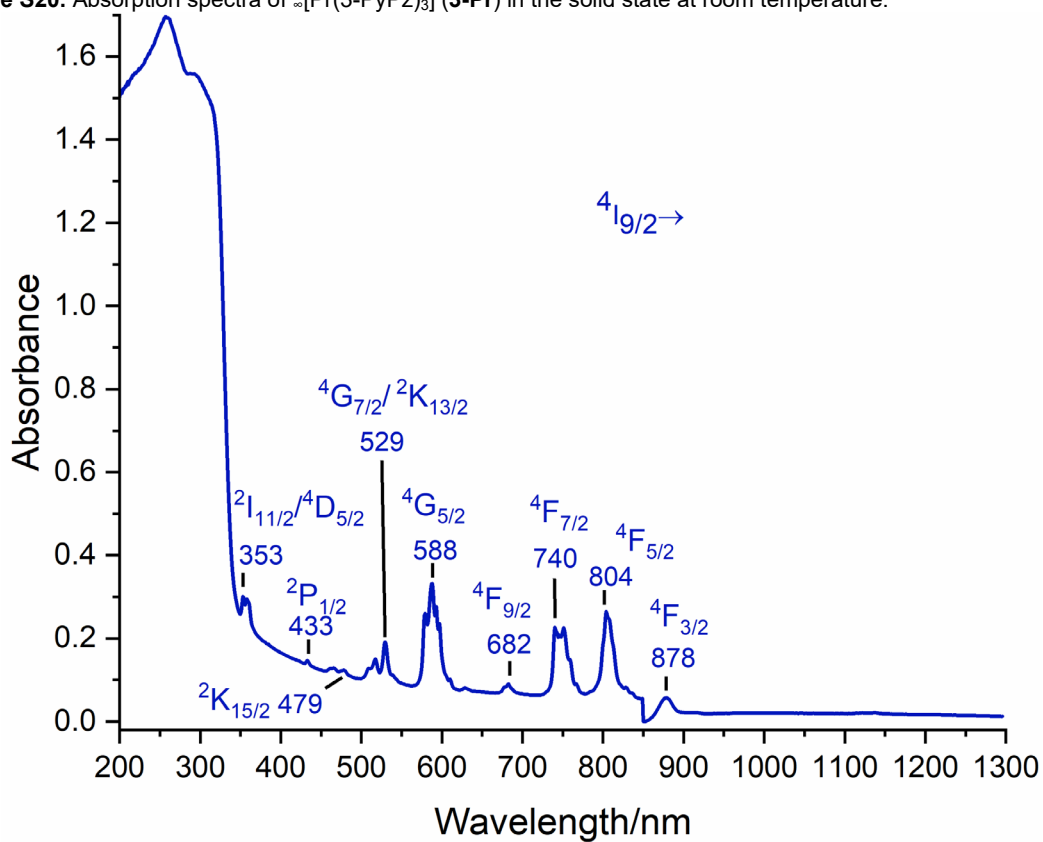

Figure S21. Absorption spectra of  $^3[Nd(3-PyPz)_3]$  (**3-Nd**) in the solid state at room temperature.

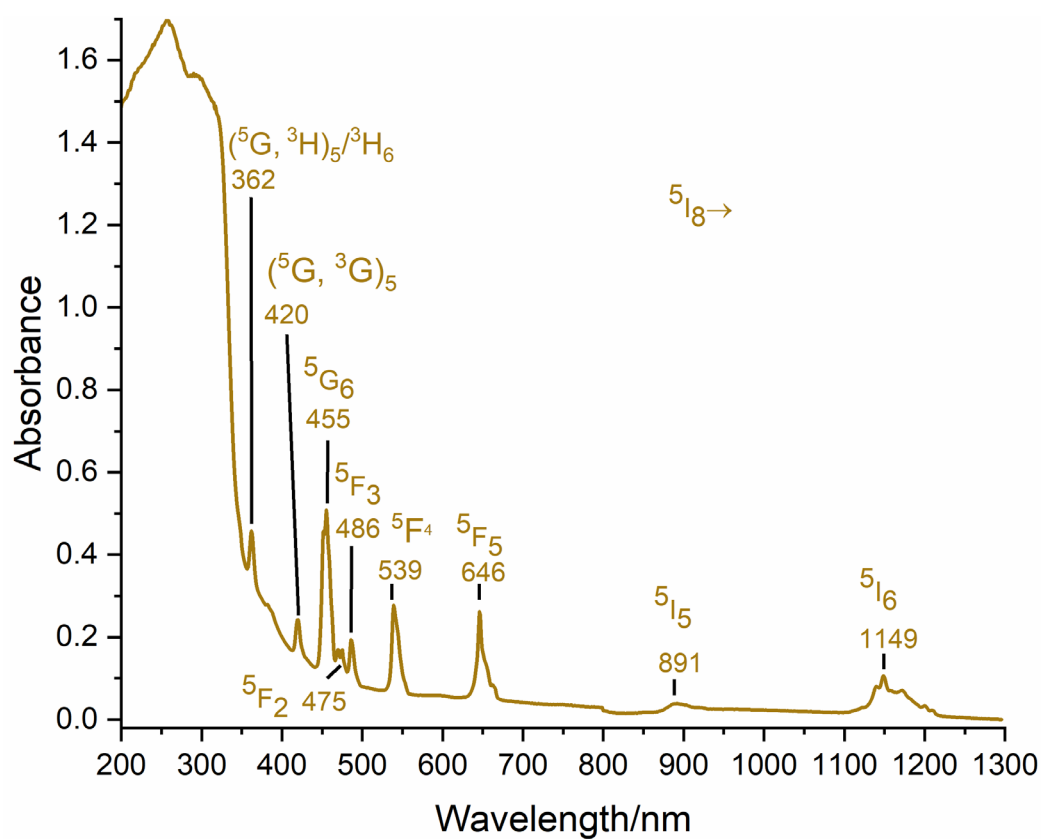

**Figure S22.** Absorption spectra of  $3[\text{Ho}(\text{3-PyPz})_3]$  (**3-Ho**) in the solid state at room temperature.

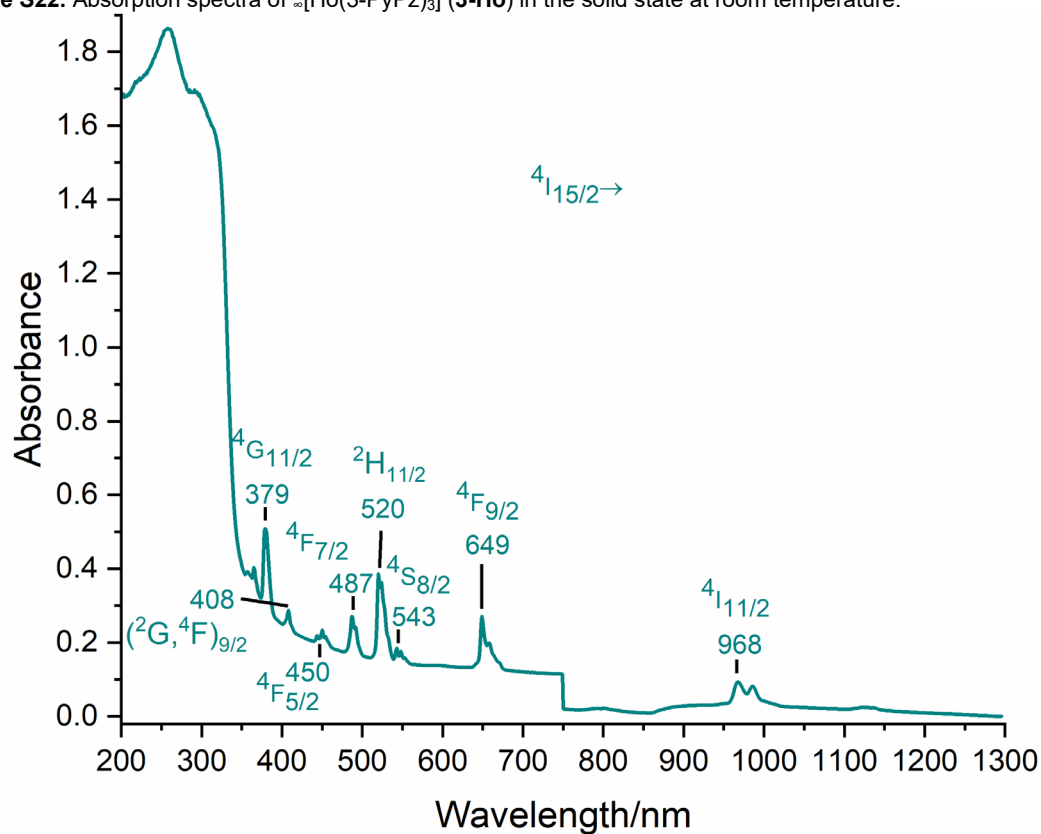

**Figure S23.** Absorption spectra of  $3[\text{Er}(\text{3-PyPz})_3]$  (**3-Er**) in the solid state at room temperature.

## CIE 1931

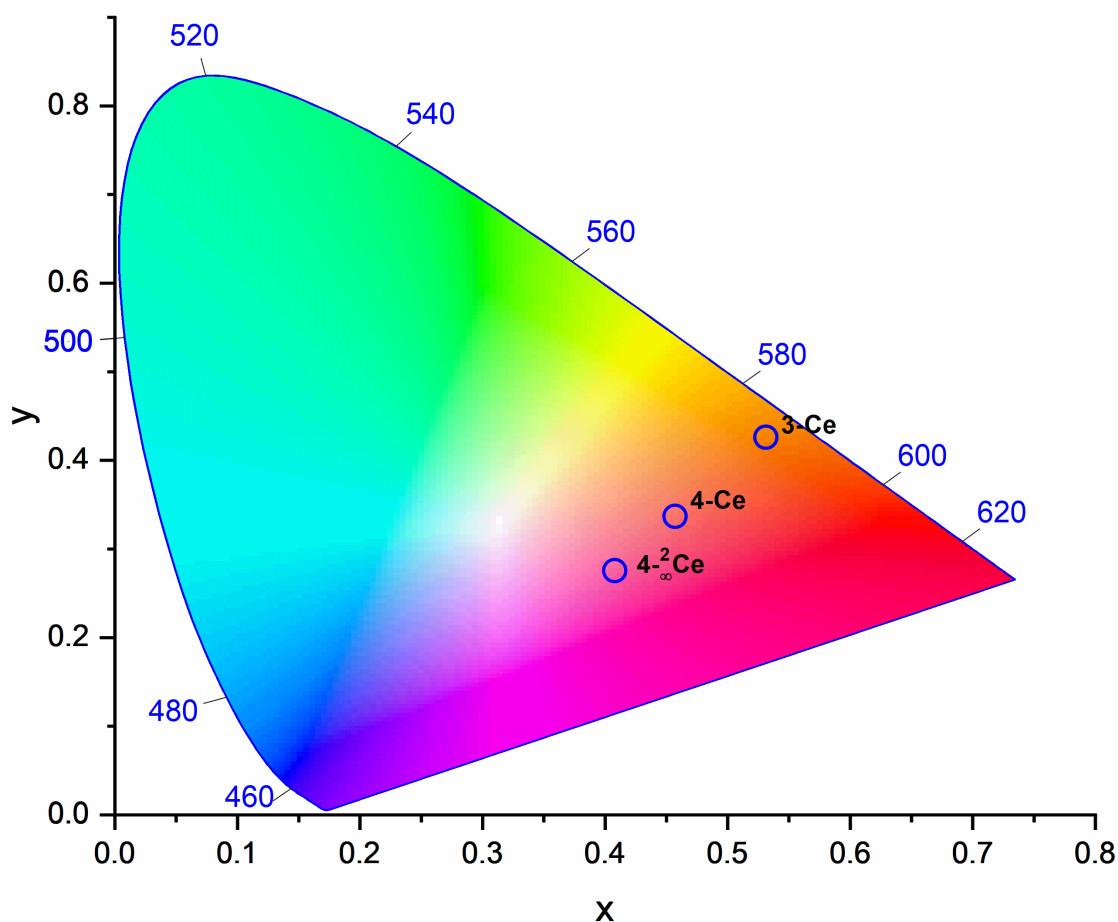

**Figure S24.** Chromaticity coordinate diagram (CIE 1931) of the emission colors of  ${}^2[\text{Ce}(\text{4-PyPz})_3(\text{Py})]$  (**4- ${}^2\text{Ce}$** ),  ${}^3[\text{Ce}(\text{4-PyPz})_3]$  (**4-Ce**) and  ${}^3[\text{Ce}(\text{3-PyPz})_3]$  (**3-Ce**).

**Table S13.** Chromaticity coordinates (x,y) for  ${}^2[\text{Ce}(\text{4-PyPz})_3(\text{Py})]$  (**4- ${}^2\text{Ce}$** ),  ${}^3[\text{Ce}(\text{4-PyPz})_3]$  (**4-Ce**), and  ${}^3[\text{Ce}(\text{3-PyPz})_3]$  (**3-Ce**).

| compound                                      |                                     | CIE, x  | CIE, y  |
|-----------------------------------------------|-------------------------------------|---------|---------|
| ${}^2[\text{Ce}(\text{4-PyPz})_3(\text{Py})]$ | <b>4-<math>{}^2\text{Ce}</math></b> | 0.40748 | 0.27594 |
| ${}^3[\text{Ce}(\text{4-PyPz})_3]$            | <b>4-Ce</b>                         | 0.45714 | 0.33718 |
| ${}^3[\text{Ce}(\text{3-PyPz})_3]$            | <b>3-Ce</b>                         | 0.53121 | 0.42624 |

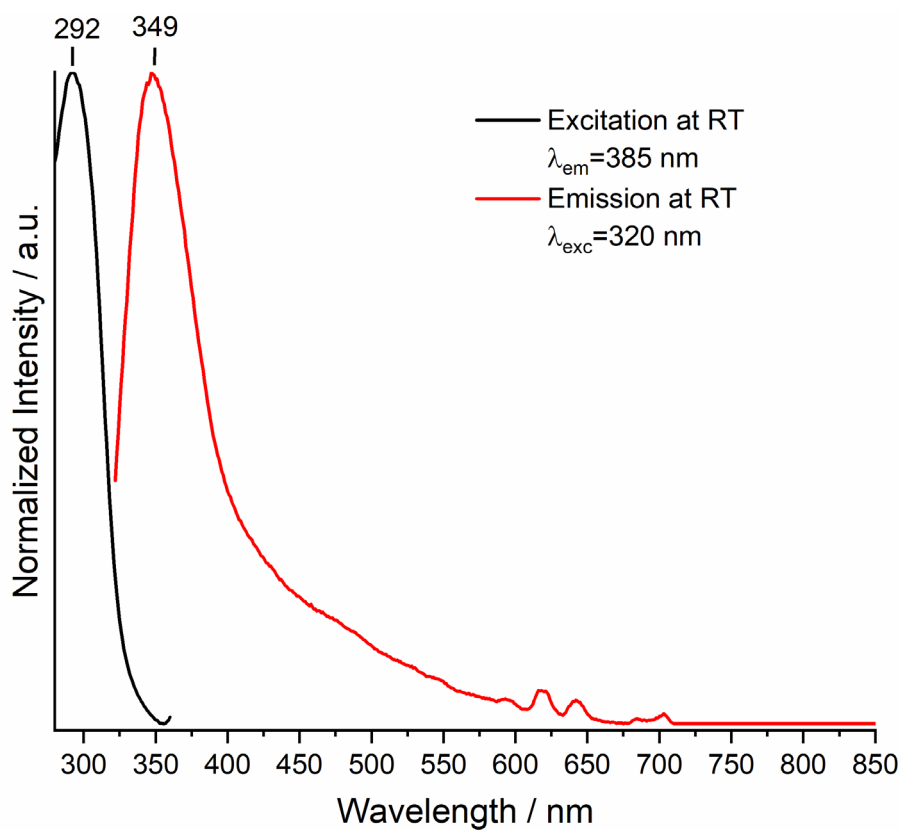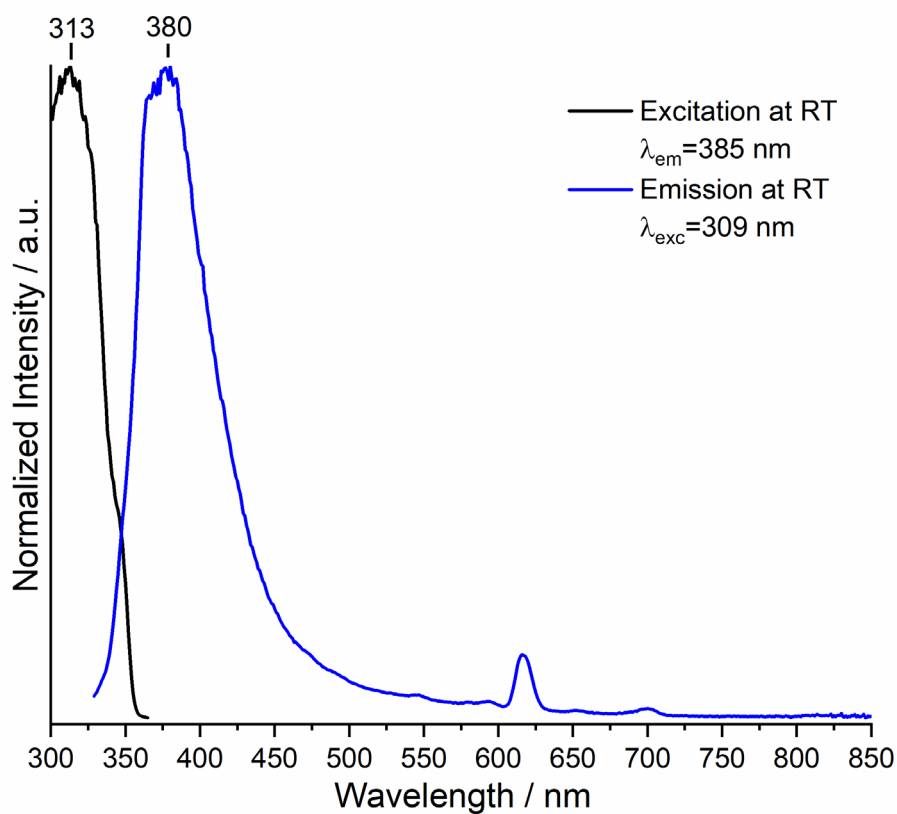

**Figure S25.** Normalized excitation and normalized emission spectra of  $[Eu(4-PyPz)_2(Py)_2]$  (**4-Eu<sup>2+</sup>**) at room temperature (top) and 77K (bottom). Wavelengths at which the spectra were recorded are reported in the legends.

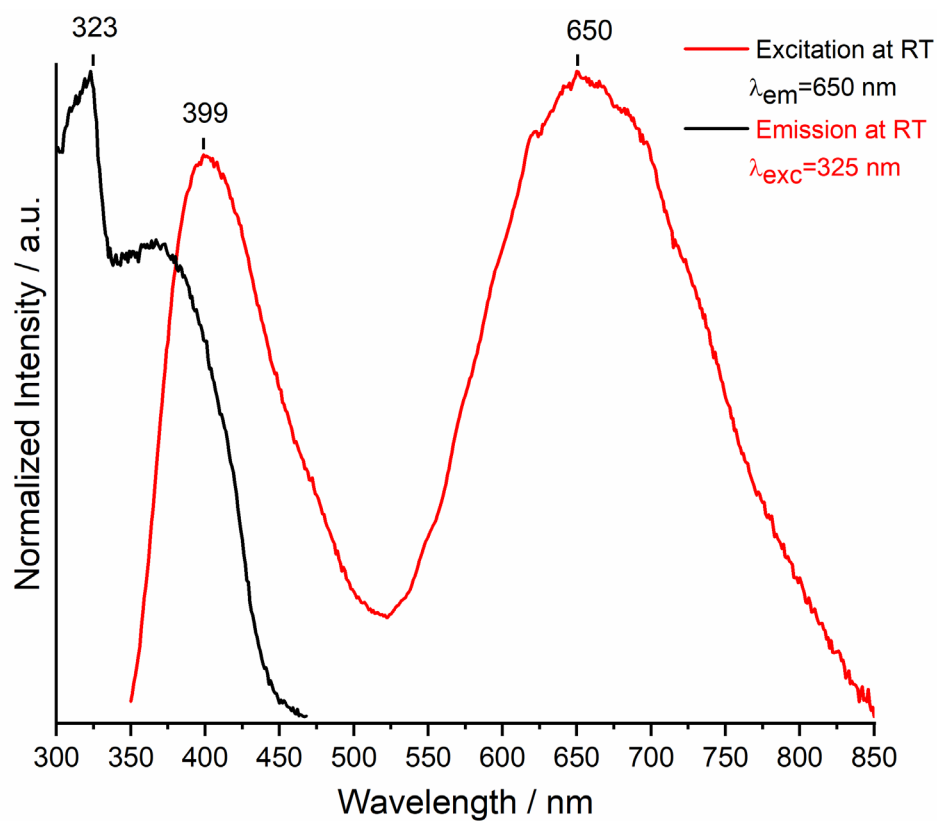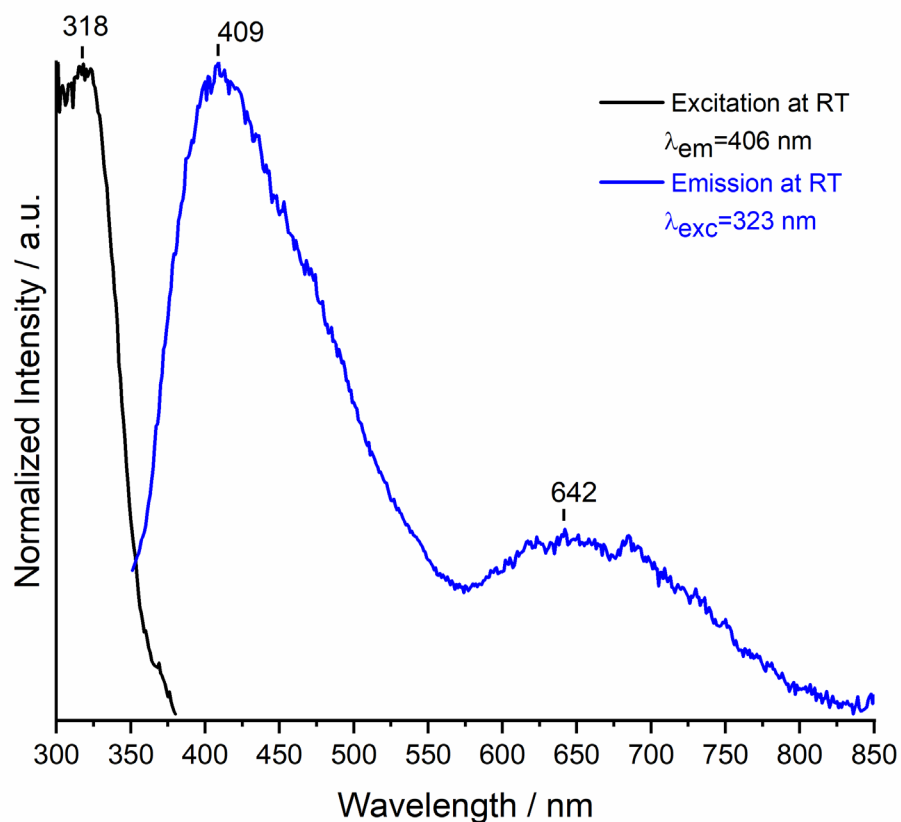

**Figure S26.** Normalized excitation and normalized emission spectra of  ${}^2[\text{Ce}(\text{4-PyPz})_3(\text{Py})]$  (**4-3Ce**) at room temperature (top) and 77K (bottom). Wavelengths at which the spectra were recorded are reported in the legends.



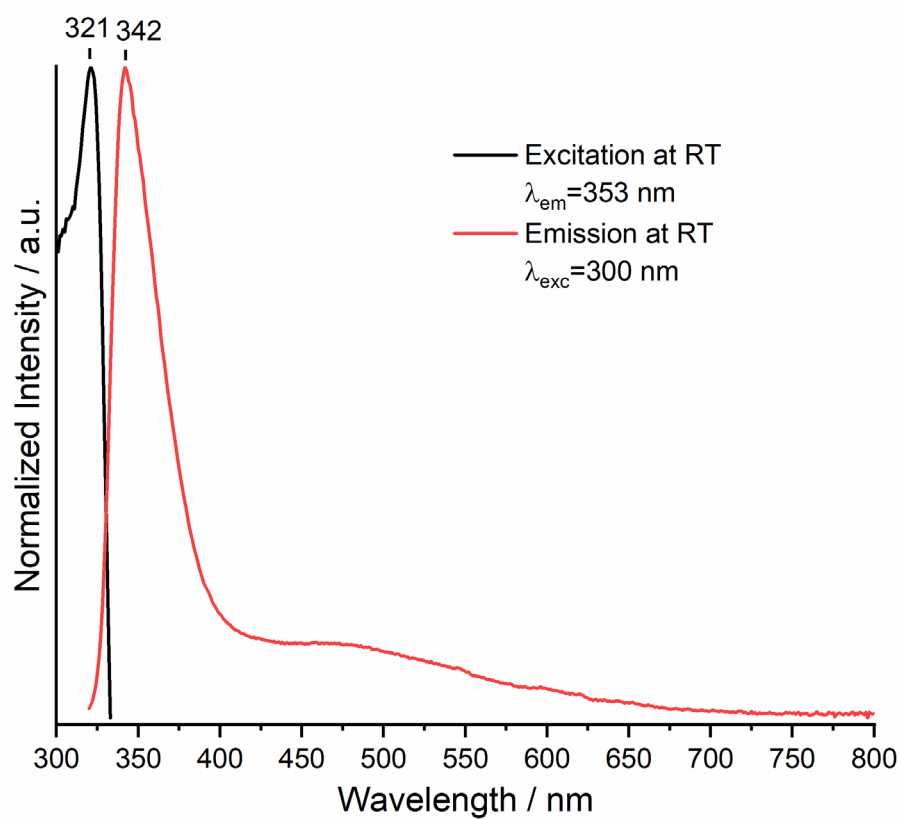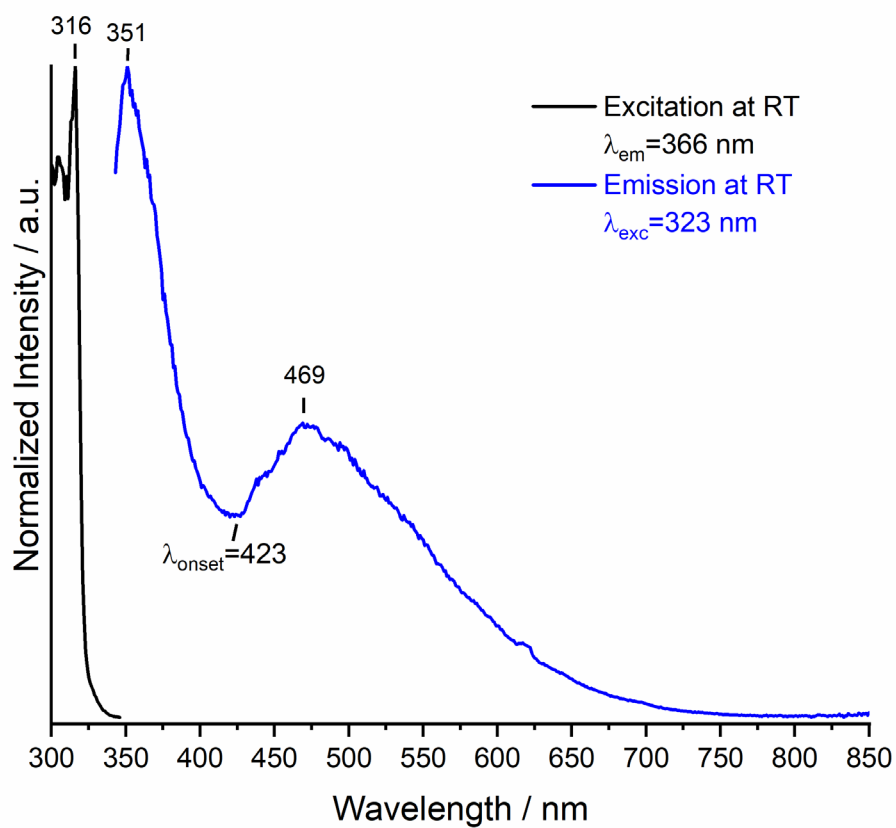

**Figure S27.** Normalized excitation and normalized emission spectra of  $[La(4-PyPz)_3]$  (**4-La**) at room temperature (top) and 77K (bottom). Wavelengths at which the spectra were recorded are reported in the legends.

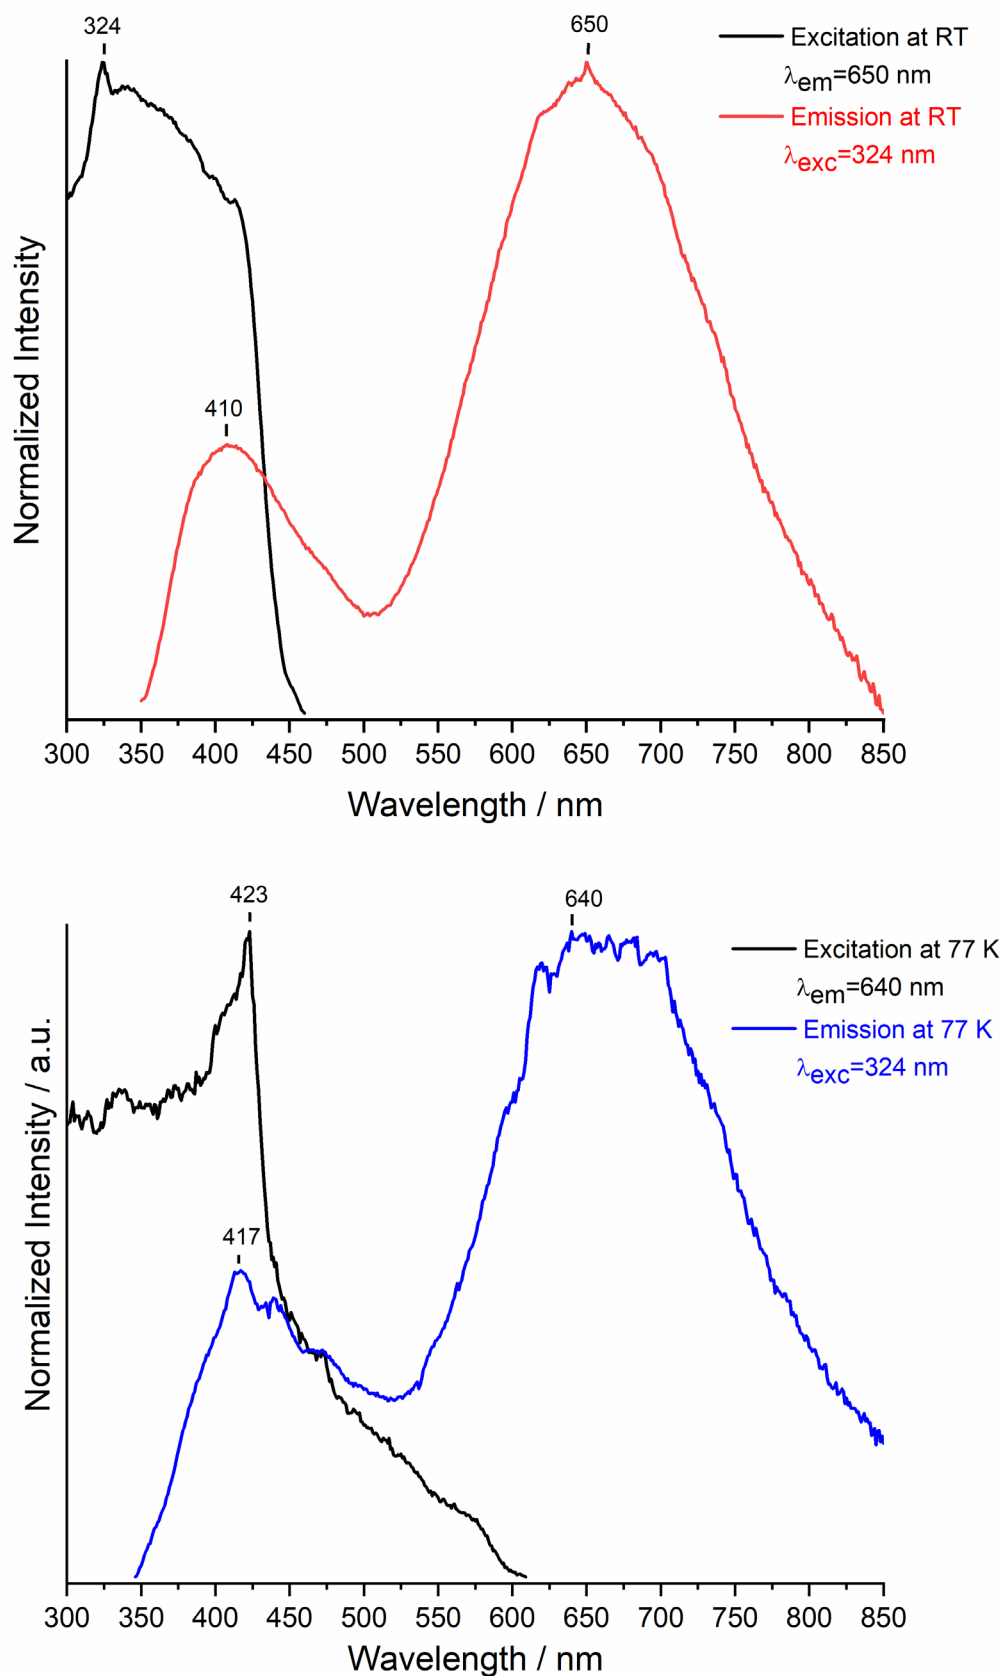

**Figure S28.** Normalized excitation and normalized emission spectra of  ${}^3[\text{Ce}(\text{4-PyPz})_3]$  (**4-Ce**) at room temperature (top) and 77K (bottom). Wavelengths at which the spectra were recorded are reported in the legends.

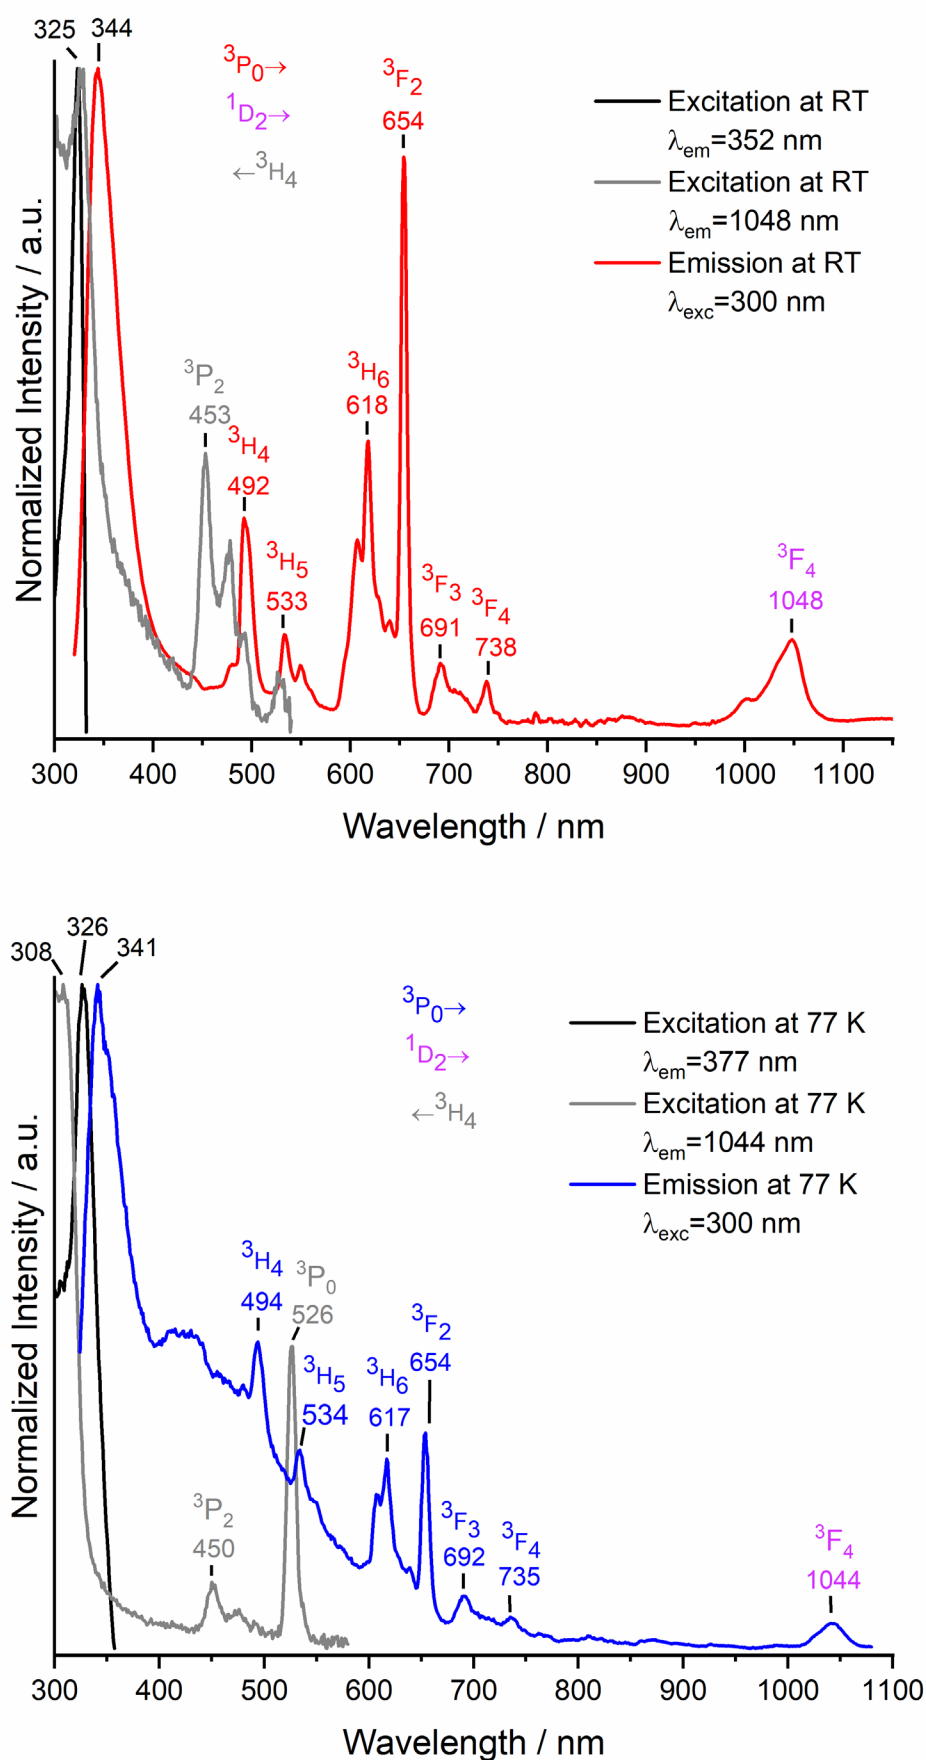

**Figure S29.** Normalized excitation and normalized emission spectra of  $^3[\text{Pr}(\text{4-PyPz})_3]$  (**4-Pr**) at room temperature (top) and 77 K (bottom). Visible and NIR range emission spectra were brought to the same intensity at 738 (at RT) and 735 (at 77 K) nm. Wavelengths at which the spectra were recorded are reported in the legends.

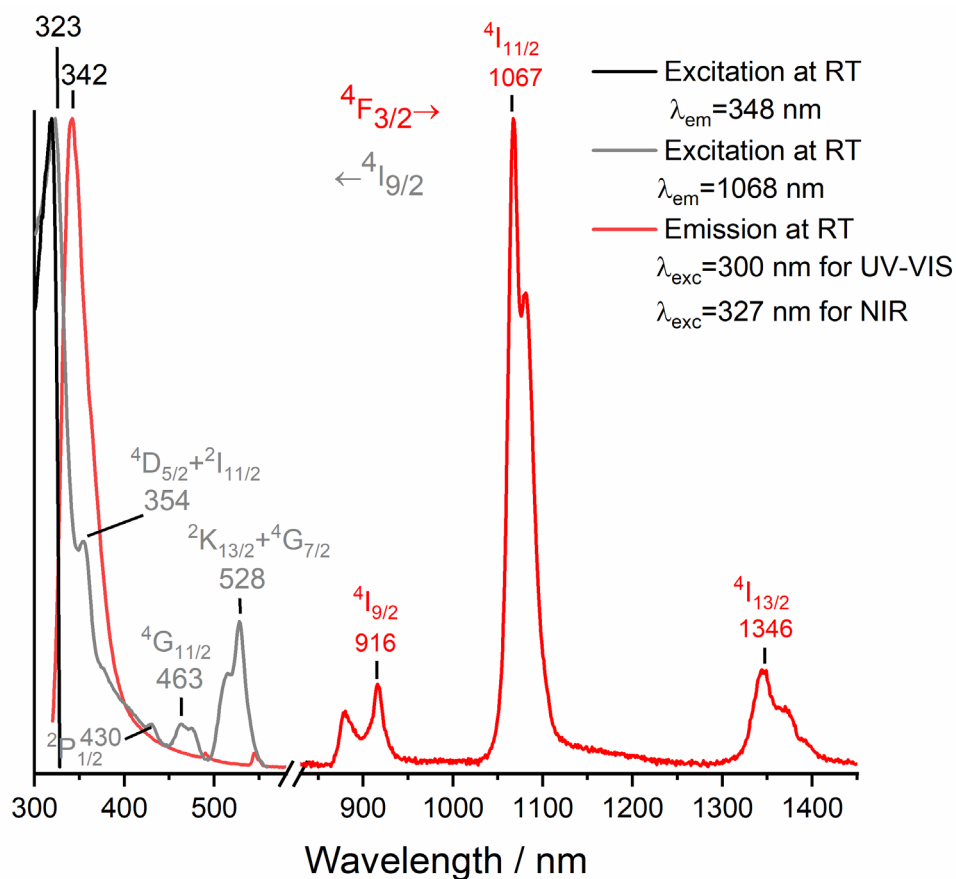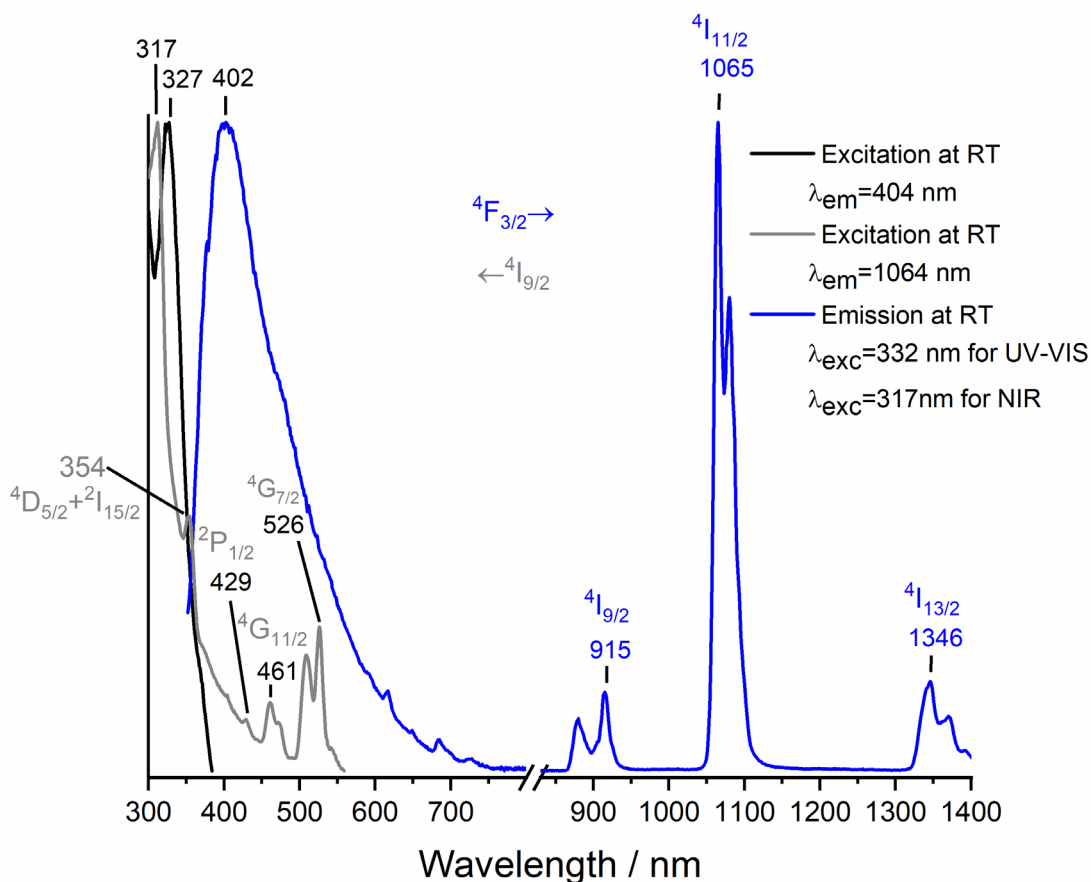

**Figure S30.** Normalized excitation and normalized emission spectra of  $3[Nd(4-PyPz)_3]$  (**4-Nd**) at room temperature (top) and 77K (bottom). Wavelengths at which the spectra were recorded are reported in the legends.

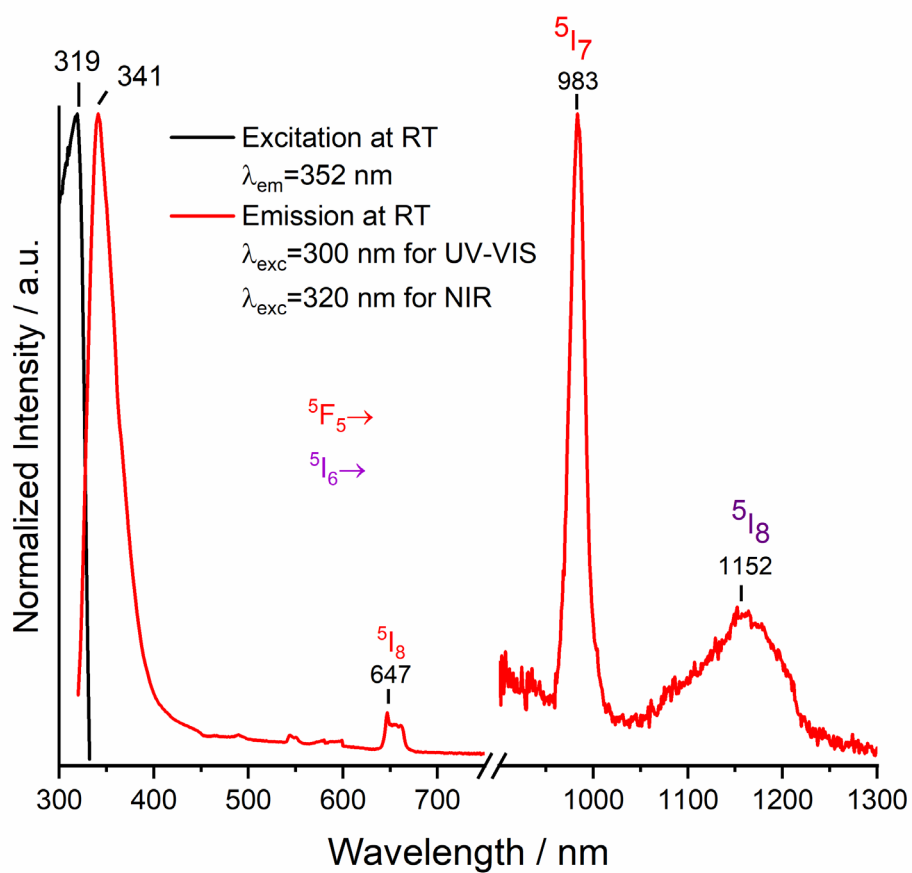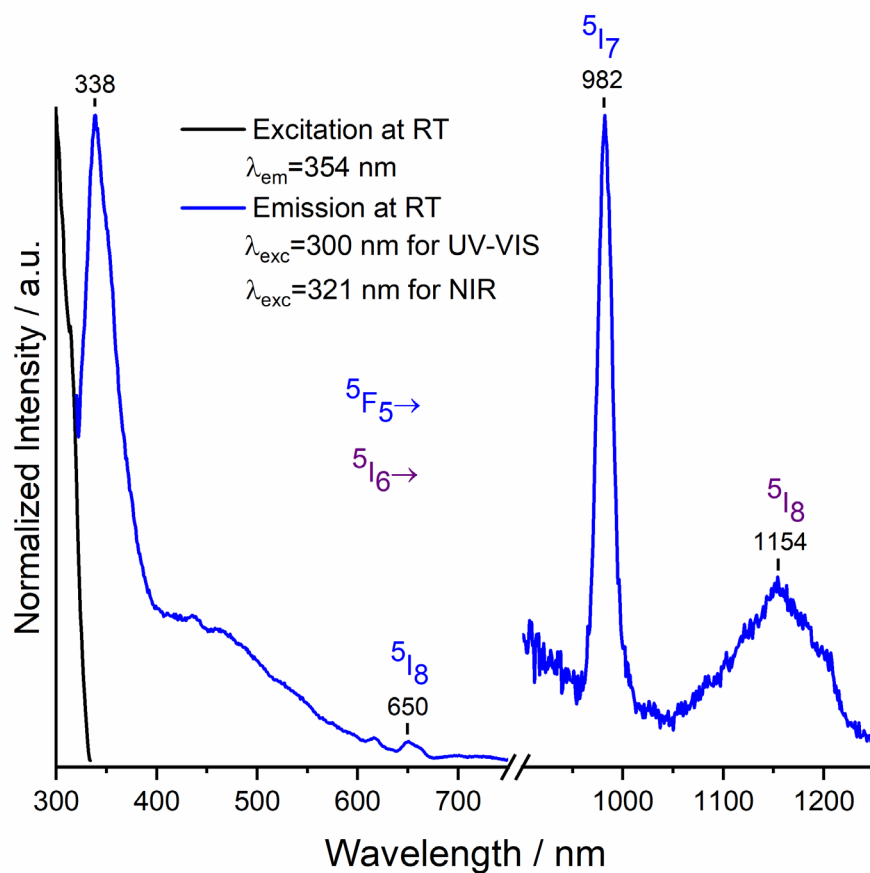

**Figure S31.** Normalized excitation and normalized emission spectra of  $^3[\text{Ho}(\text{4-PyPz})_3]$  (**4-Ho**) at room temperature (top) and 77K (bottom). Wavelengths at which the spectra were recorded are reported in the legends.

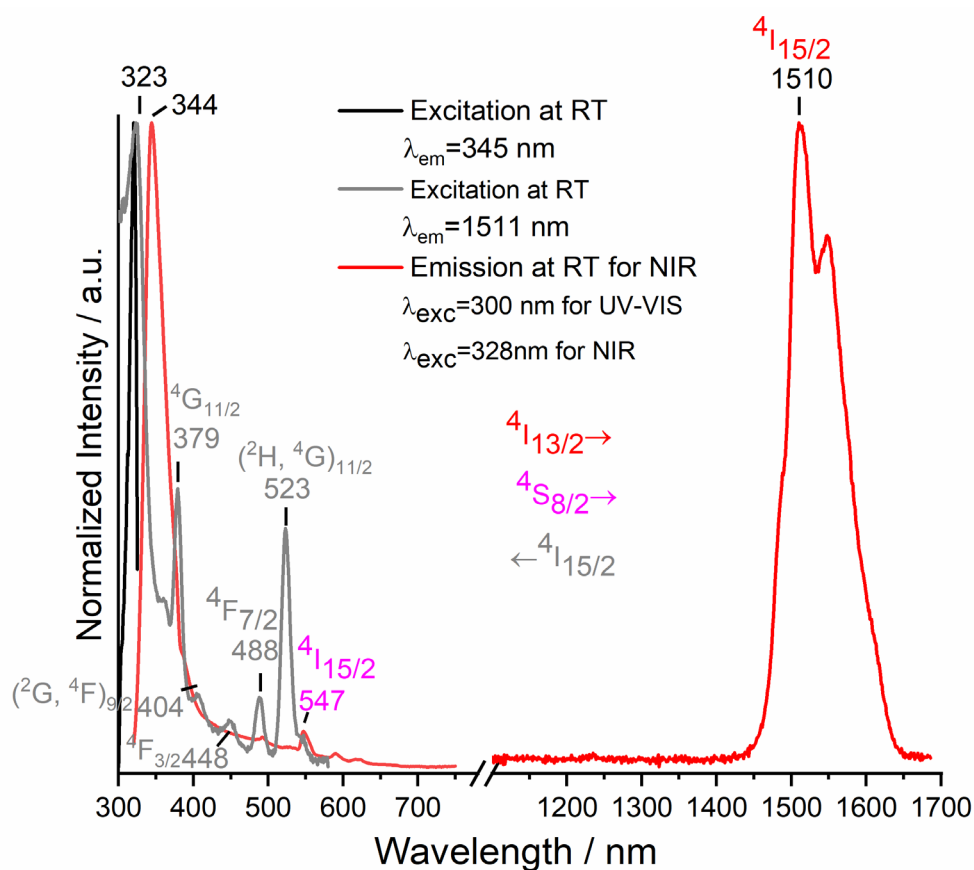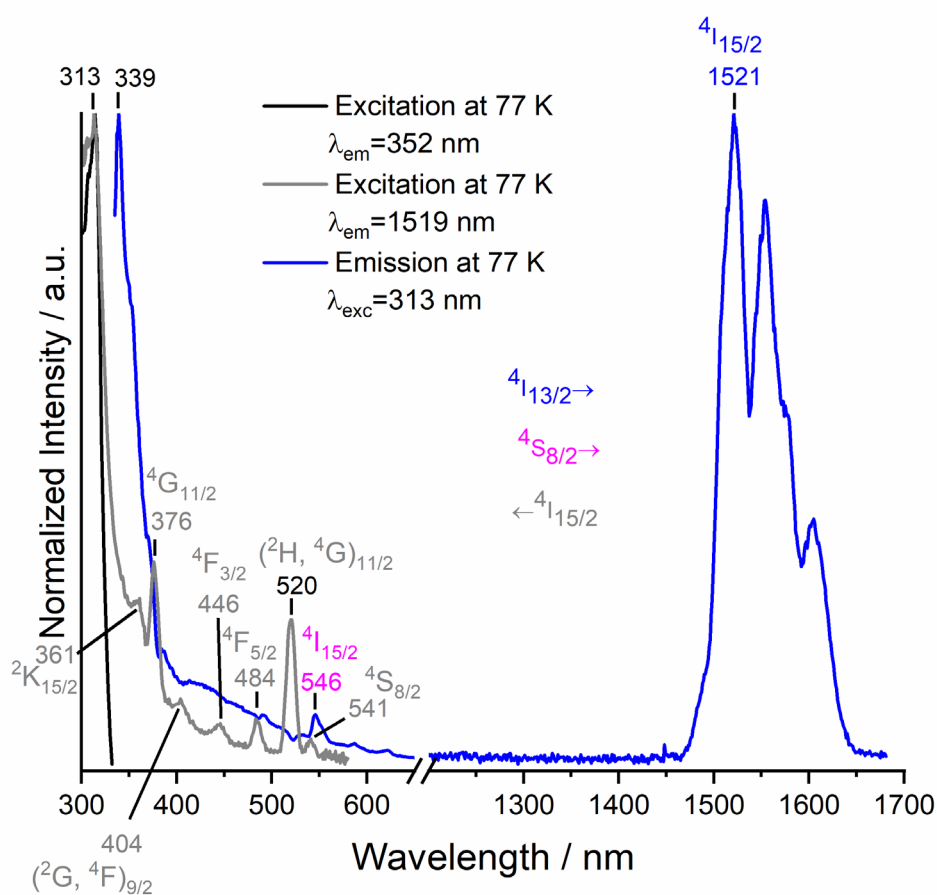

**Figure S32.** Normalized excitation and normalized emission spectra of  $3[Er(4-PyPz)_3]$  (**4-Er**) at room temperature (top) and 77K (bottom). Wavelengths at which the spectra were recorded are reported in the legends.

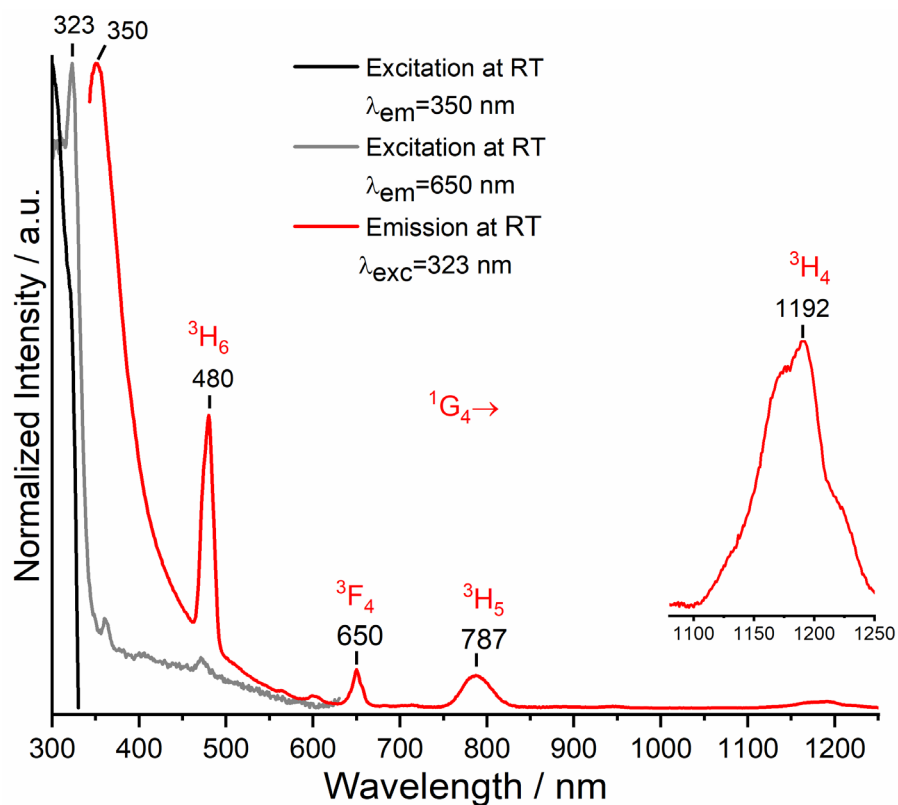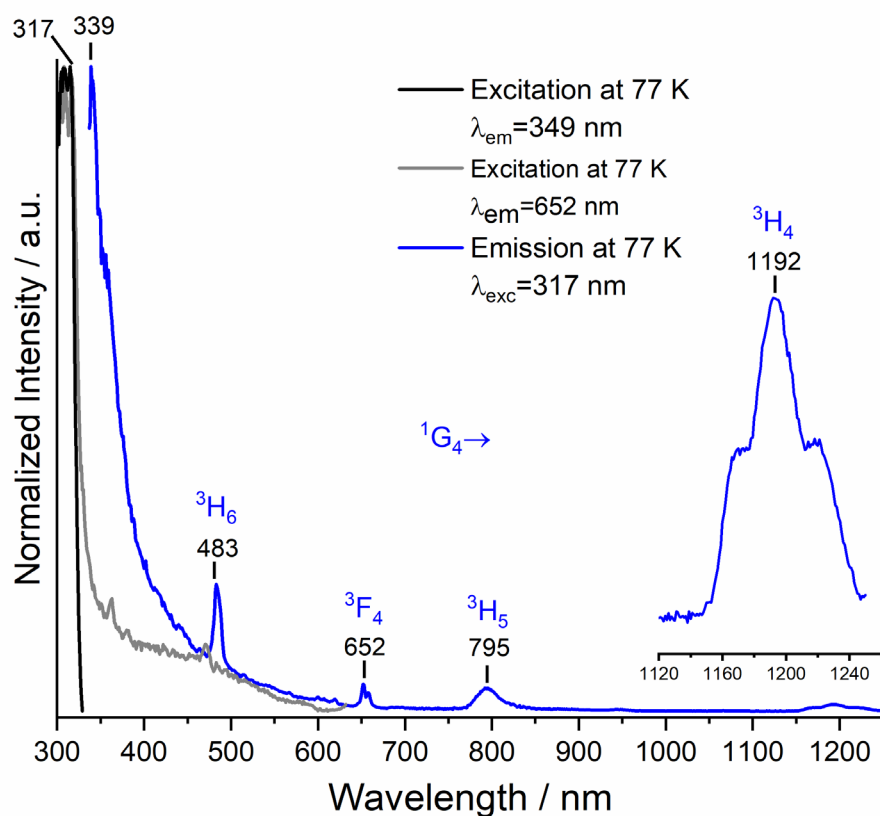

**Figure S33.** Normalized excitation and normalized emission spectra of  $^3[Tm(4-PyPz)_3]$  (**4-Tm**) at room temperature (top) and 77K (bottom). Visible and NIR range emission spectra were brought to the same intensity at 650 (at RT) and 652 (at 77 K) nm. Wavelengths at which the spectra were recorded are reported in the legends.

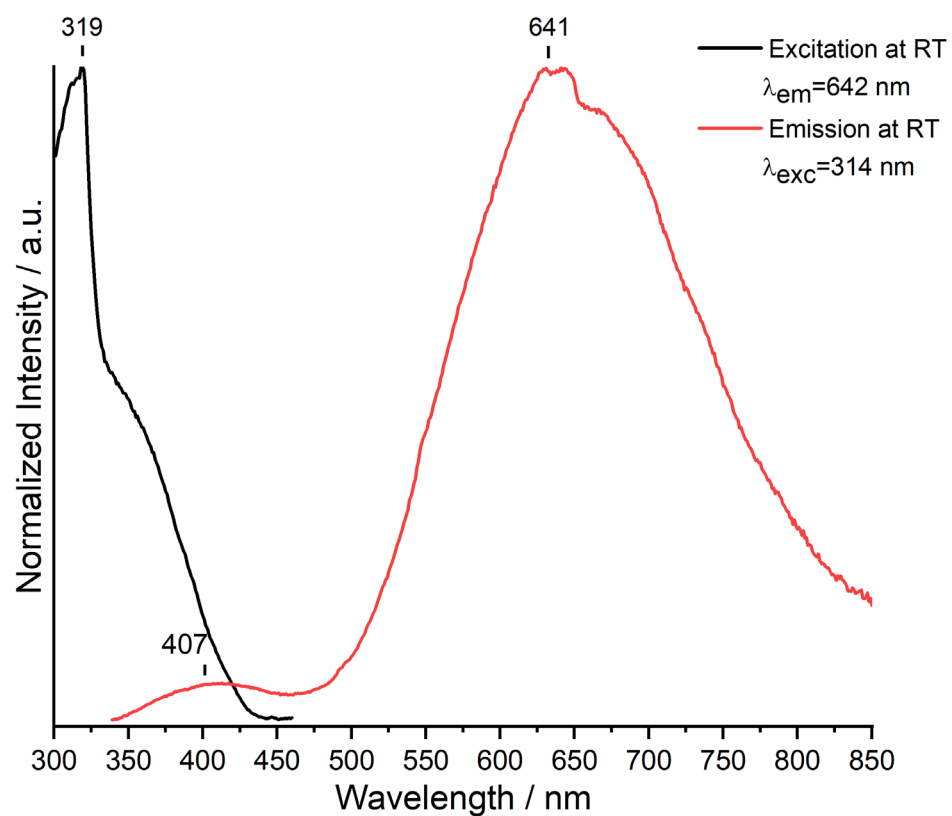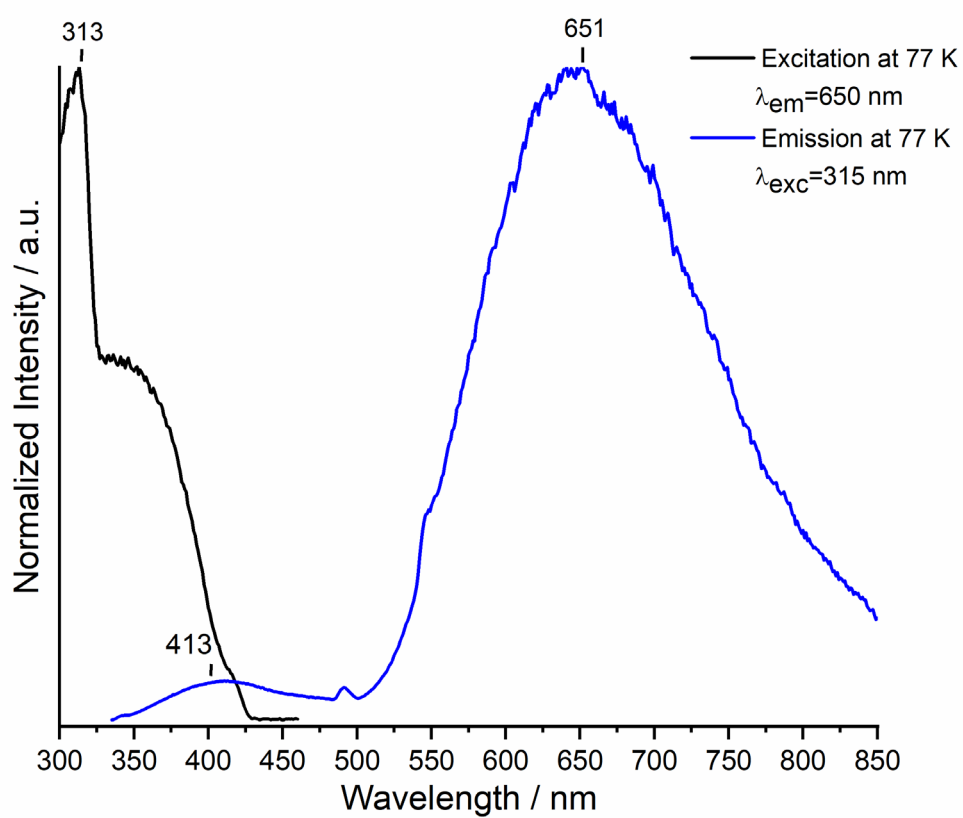

**Figure S34.** Normalized excitation and normalized emission spectra of  $[\text{Ce}(\text{3-PyPz})_3]$  (**3-Ce**) at room temperature (top) and 77K (bottom). Wavelengths at which the spectra were recorded are reported in the legends.



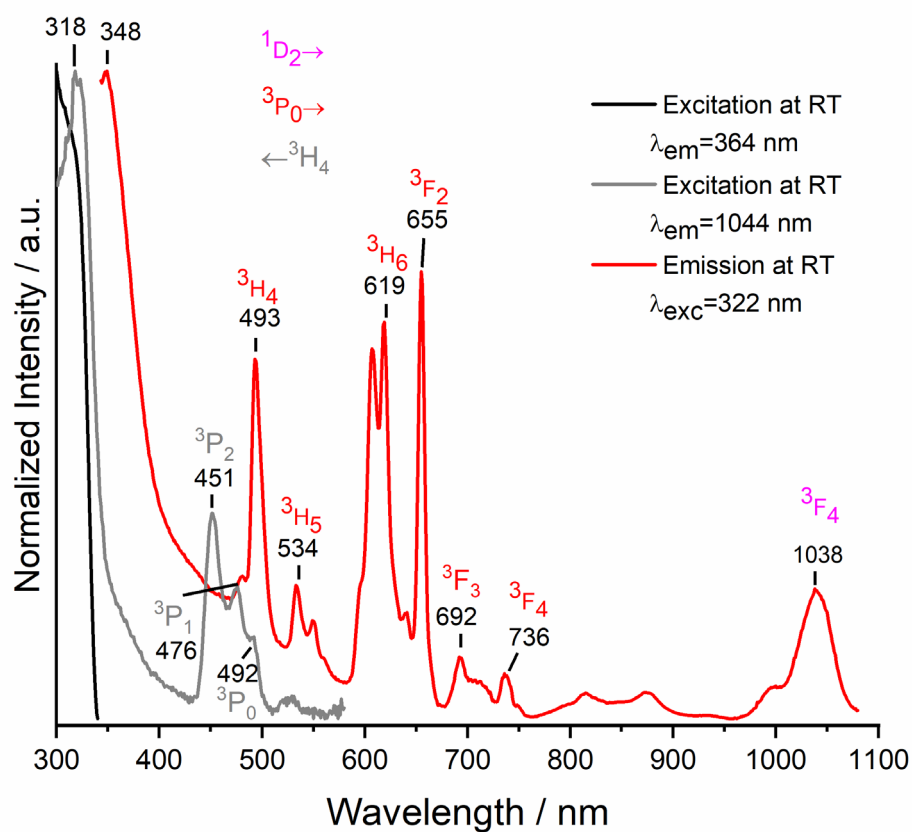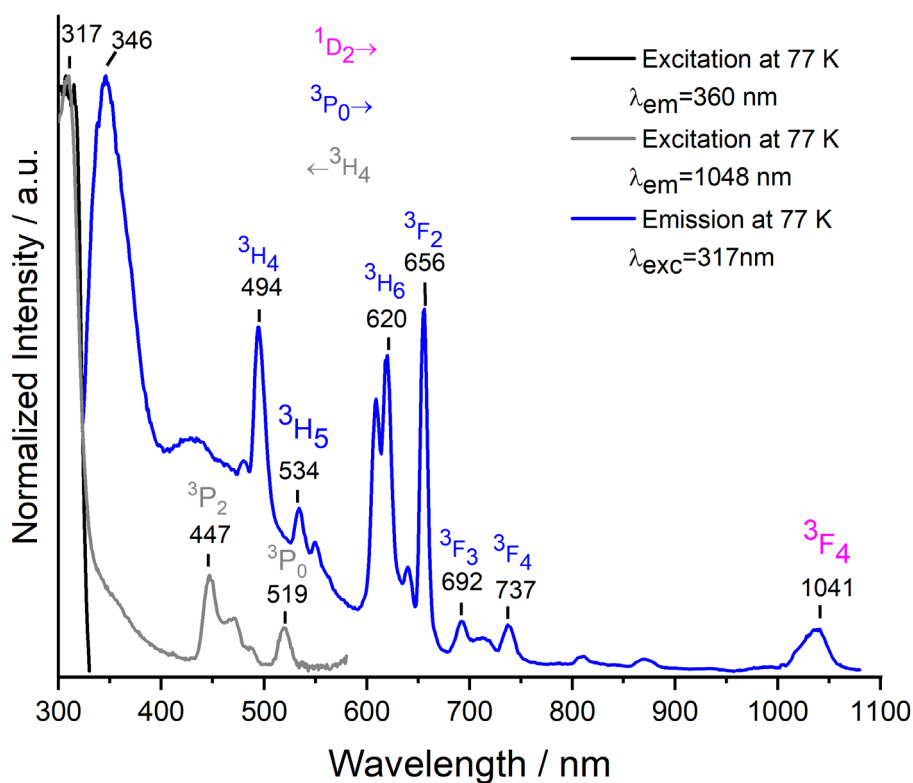

**Figure S35.** Normalized excitation and normalized emission spectra of  $3[Pr(3-PyPz)_3]$  (**3-Pr**) at room temperature (top) and 77K (bottom). Visible and NIR range emission spectra were brought to the same intensity at 736 (at RT) and 737 (at 77 K) nm. Wavelengths at which the spectra were recorded are reported in the legends.

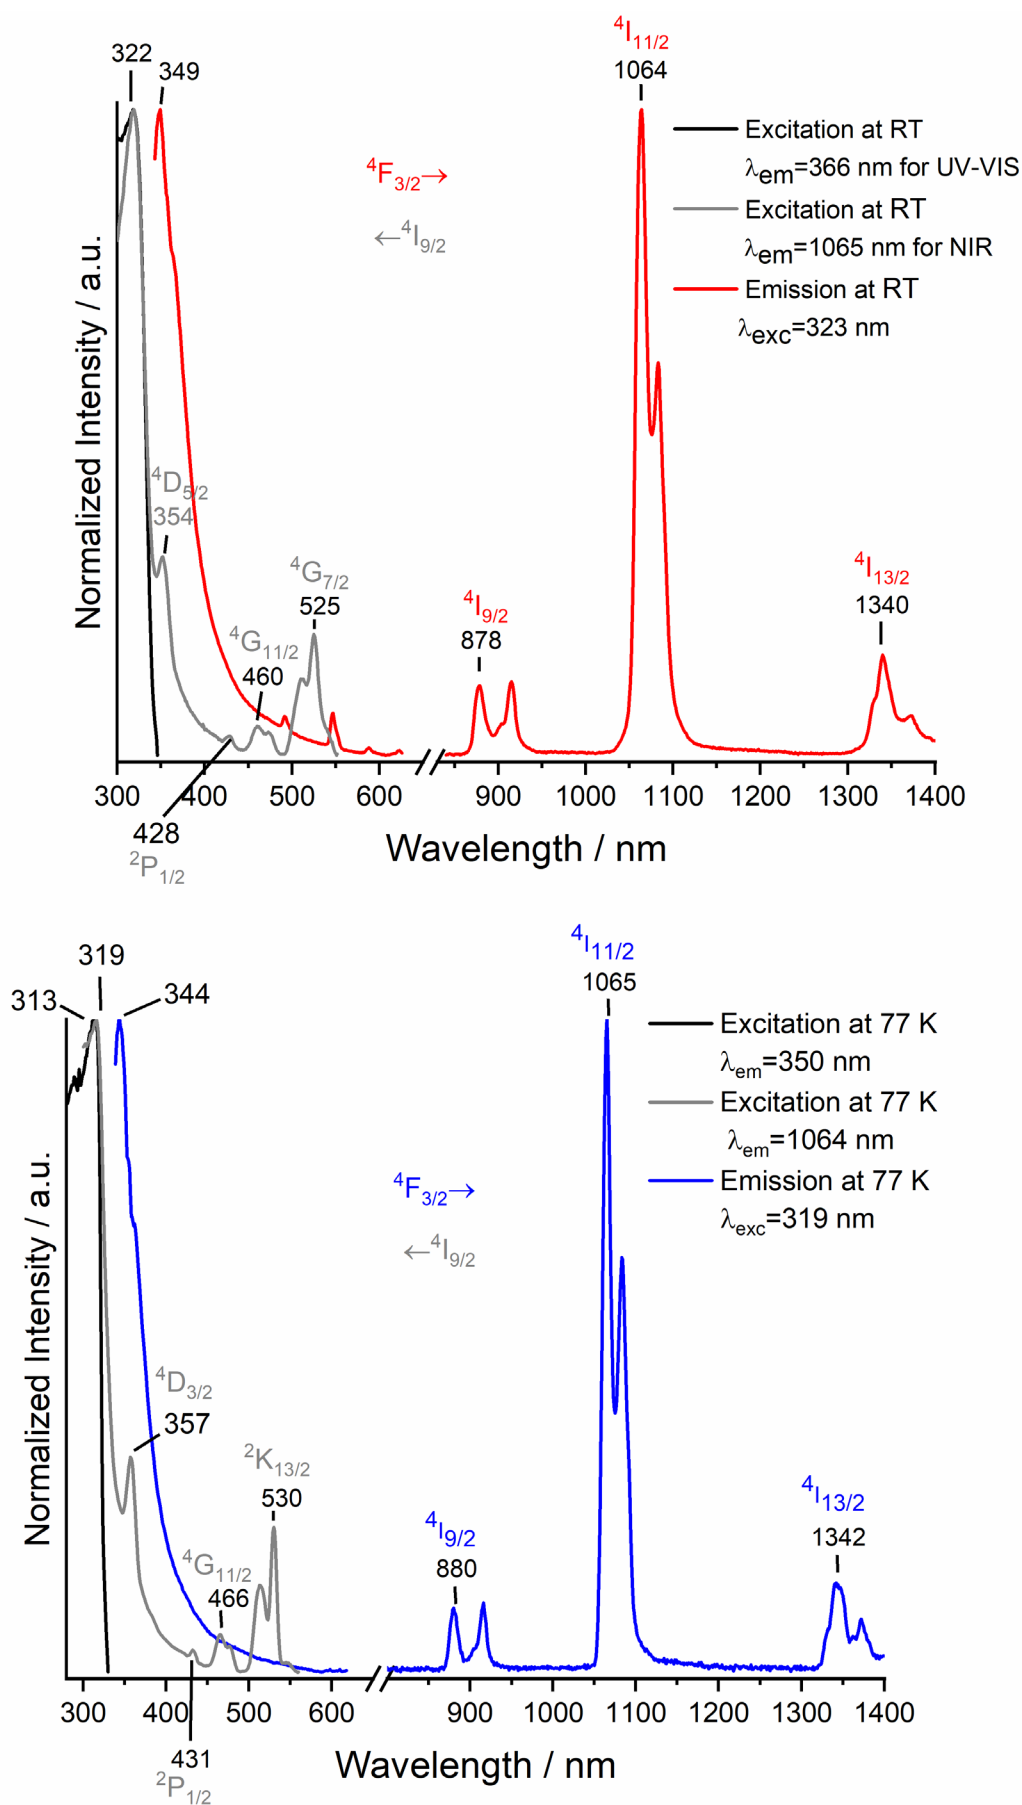

**Figure S36.** Normalized excitation and normalized emission spectra of  $[\text{Nd}(\text{3-PyPz})_3]$  (**3-Nd**) at room temperature (top) and 77K (bottom). Wavelengths at which the spectra were recorded are reported in the legends.

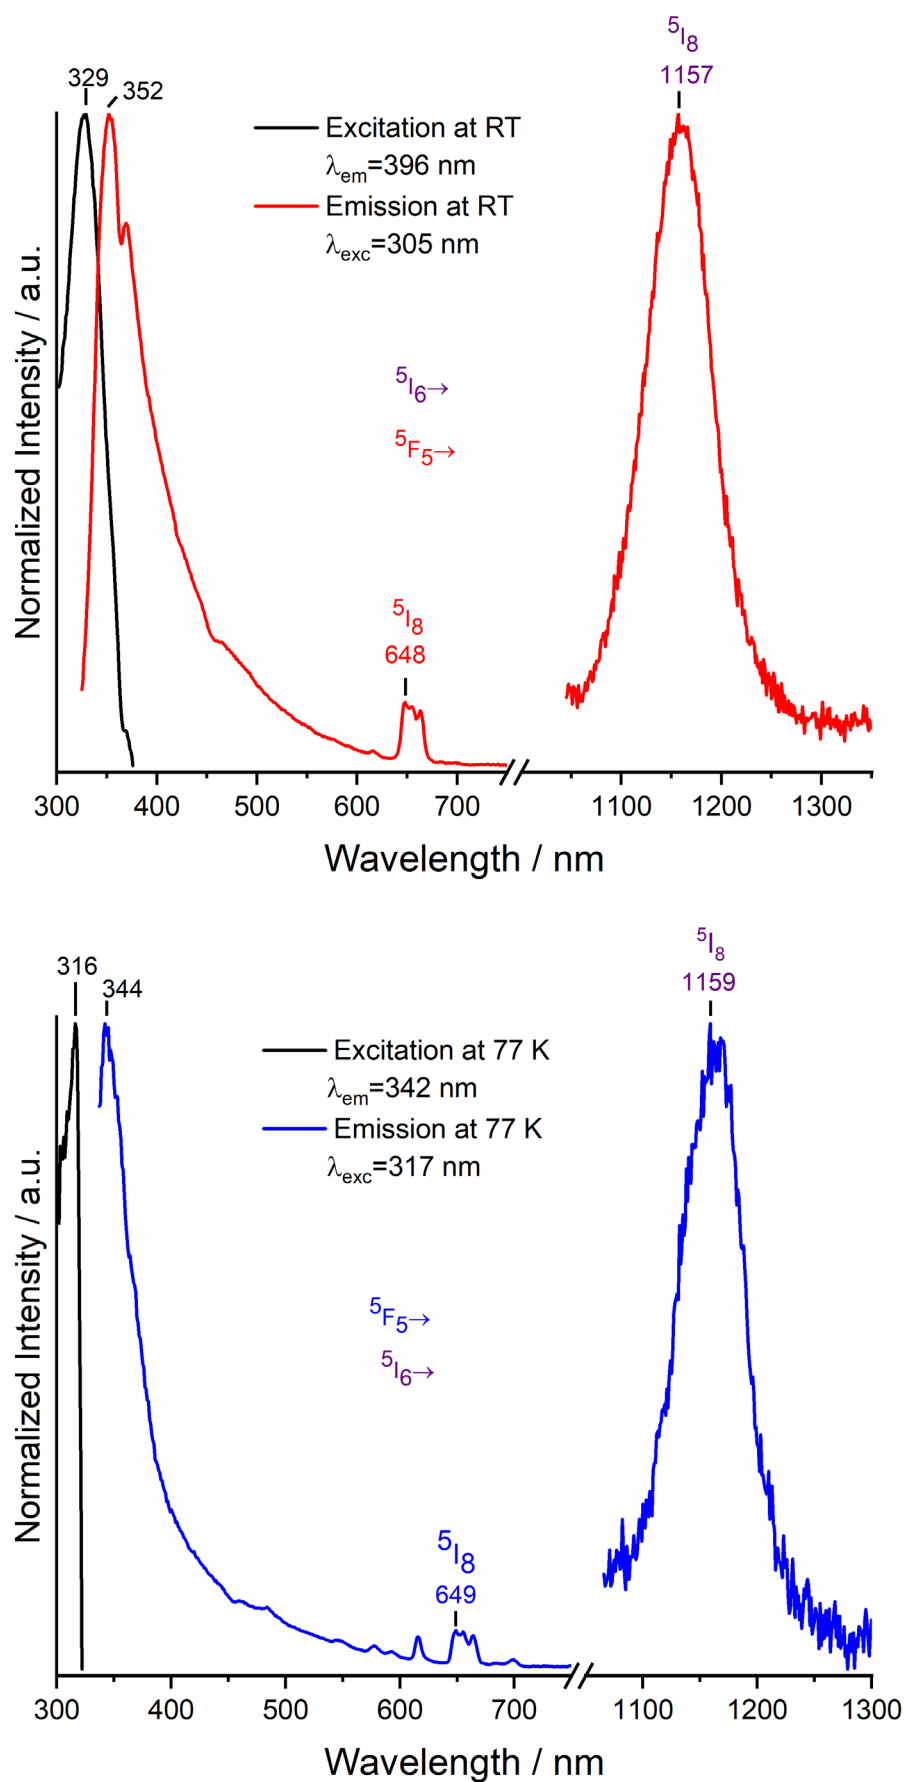

**Figure S37.** Normalized excitation and normalized emission spectra of  $3[\text{Ho}(\text{3-PyPz})_3]$  (**3-Ho**) at room temperature (top) and 77K (bottom). Wavelengths at which the spectra were recorded are reported in the legends.

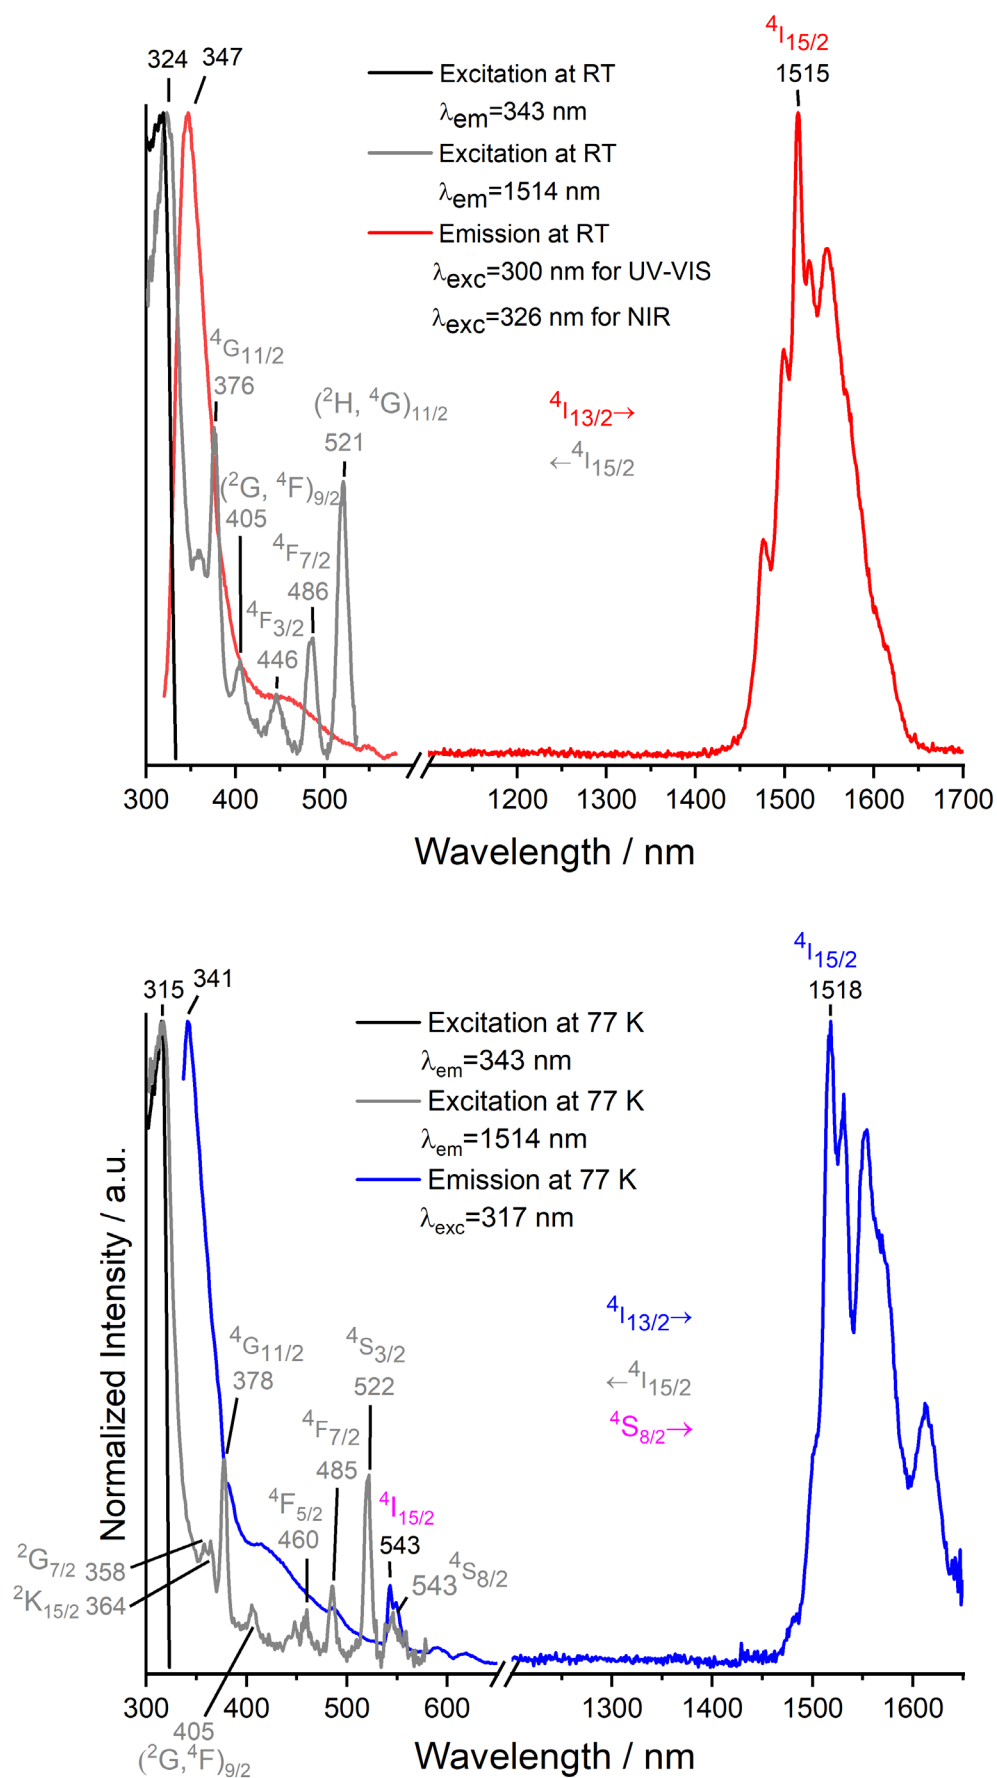

**Figure S38.** Normalized excitation and normalized emission spectra of  ${}^3[\text{Er}(\text{3-PyPz})_3]$  (**3-Er**) at room temperature (top) and 77 K (bottom). Wavelengths at which the spectra were recorded are reported in the legends.

**Table S14.** Photophysical data of  ${}^2[\text{Eu}(\text{4-PyPz})_2(\text{Py})_2]$  (**4-Eu<sup>2+</sup>**),  ${}^2[\text{Ce}(\text{4-PyPz})_3(\text{Py})]$  (**4- $\lambda$ -Ce**),  ${}^3[\text{Ln}(\text{4-PyPz})_3]$ , (**4**, Ln = La, Ce, Pr, Nd, Ho, Er, Tm) and  ${}^3[\text{Ln}(\text{3-PyPz})_3]$ , (**3**, Ln = Ce, Pr, Nd, Ho, Er) in the solid state at room temperature and 77 K.

| ID                               | $\tau(\text{RT})^{[\text{a}]}$ | $\lambda_{\text{ex}}/\lambda_{\text{em}}$<br>[nm] <sup>[b]</sup> | $\tau(77\text{ K})^{[\text{c}]}$ | $\lambda_{\text{ex}}/\lambda_{\text{em}}$<br>[nm] <sup>[d]</sup> |
|----------------------------------|--------------------------------|------------------------------------------------------------------|----------------------------------|------------------------------------------------------------------|
| <b>4-Eu<sup>2+</sup></b>         | 1.34(3) ns                     | 287/385                                                          | 2.18(5) ns                       | 287/377                                                          |
| <b>4-<math>\lambda</math>-Ce</b> | 1.08(2) ns                     | 287/650                                                          | 1.18(3) ns                       | 287/643                                                          |
| <b>4-Ce</b>                      | 1.16(2) ns                     | 287/650                                                          | 1.06(5) ns                       | 287/640                                                          |
| <b>3-Ce</b>                      | 1.26(2) ns                     | 287/641                                                          | 1.20(3) ns                       | 287/650                                                          |
| <b>4-La</b>                      | 1.079(5) ns                    | 287/342                                                          | 1.738(9) ns                      | 351/287                                                          |
|                                  |                                |                                                                  | <2 $\mu\text{s}$                 | 316/469                                                          |
| <b>4-Pr</b>                      | 0.96(2) ns                     | 287/344                                                          | 1.23(5) ns                       | 287/341                                                          |
| <b>3-Pr</b>                      | 0.99(2) ns                     | 287/348                                                          | 1.20(2) ns                       | 287/346                                                          |
| <b>4-Nd</b>                      | 0.93(2) ns                     | 287/342                                                          | 3.04(9) ns                       | 287/402                                                          |
| <b>3-Nd</b>                      | 0.99(2) ns                     | 287/349                                                          | 1.30(2) ns                       | 287/344                                                          |
| <b>4-Ho</b>                      | 0.97(2) ns                     | 287/341                                                          | 1.34(4) ns                       | 287/338                                                          |
| <b>3-Ho</b>                      | 1.00(2) ns                     | 287/352                                                          | 1.19(2) ns                       | 287/344                                                          |
| <b>4-Er</b>                      | 0.98(1) ns                     | 287/344                                                          | 1.16(5) ns                       | 287/339                                                          |
| <b>3-Er</b>                      | 1.02(1) ns                     | 287/347                                                          | 1.19(4) ns                       | 287/341                                                          |
| <b>4-Tm</b>                      | 1.04(1) ns                     | 287/350                                                          | 1.15(3) ns                       | 287/349                                                          |

[a] Emission lifetime determined at RT. [b] Excitation and emission wavelengths for emission lifetime at RT. [c] Emission lifetime determined at 77 K. [d] Excitation and emission wavelengths for emission lifetime at 77 K.

## IR Spectroscopy

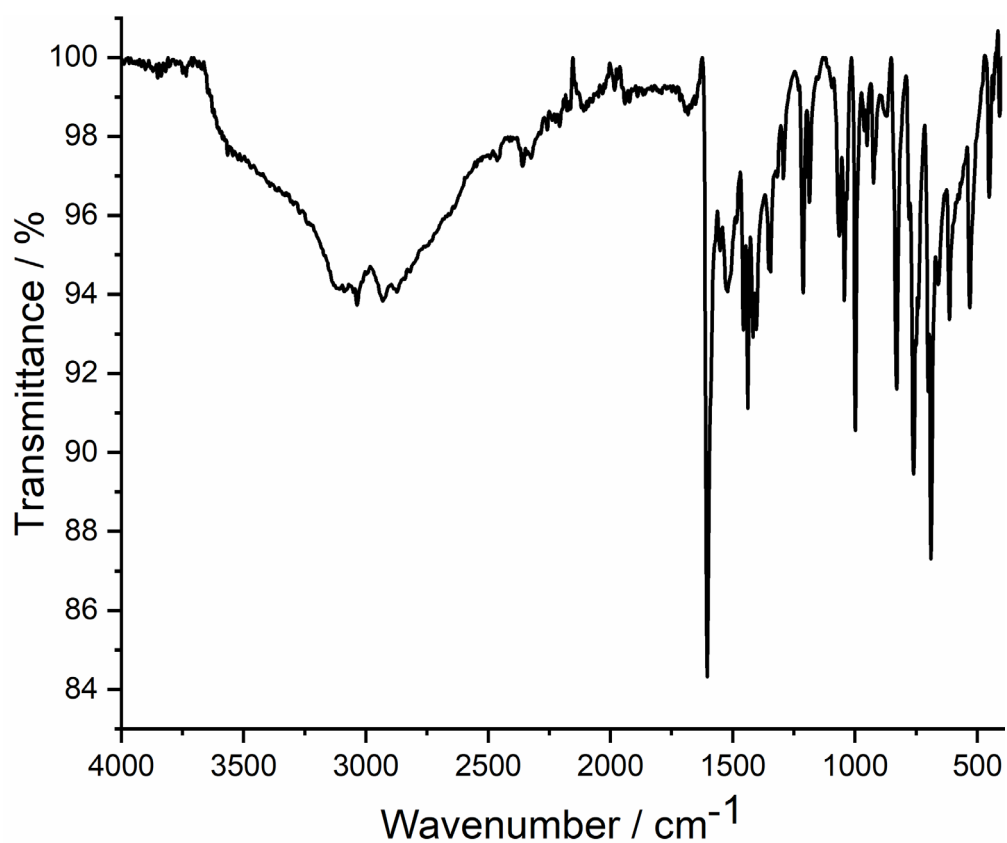

**Figure S39.** The infrared spectrum (ATR) of coordination polymer  $2[\text{Eu}(\text{4-PyPz})_3(\text{Py})_2]$  ( $4\text{-Eu}^{2+}$ ).

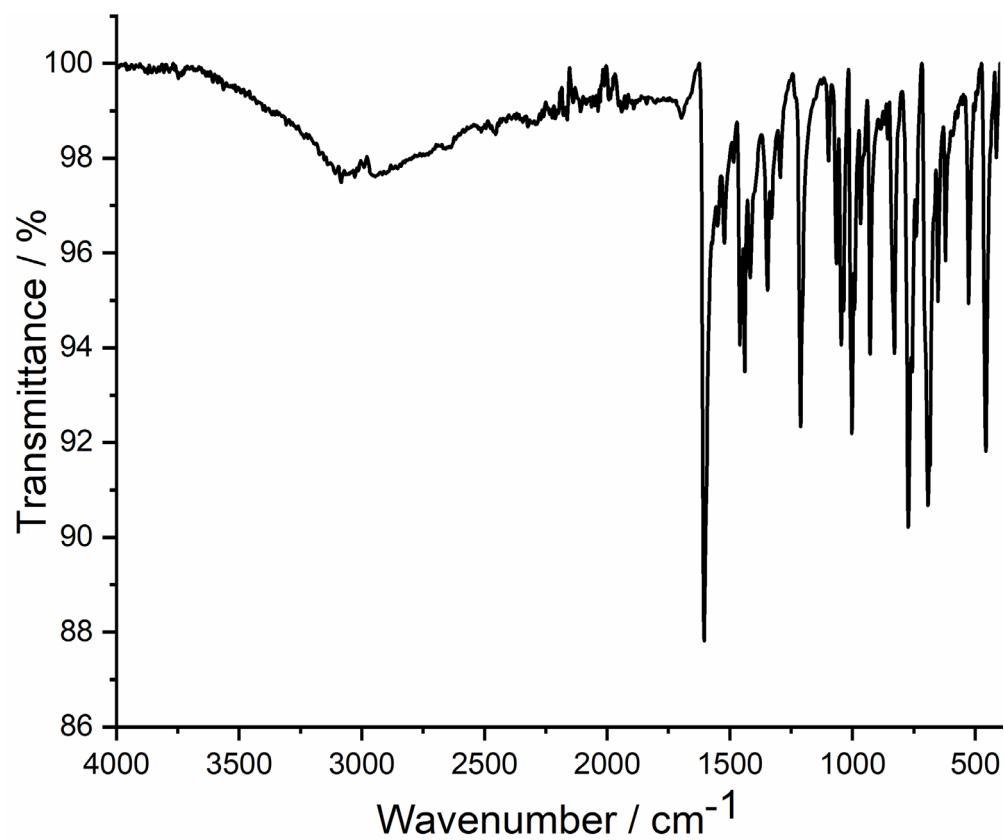

**Figure S40.** The infrared spectrum (ATR) of coordination polymer  $2[\text{Ce}(\text{4-PyPz})_3(\text{Py})]$  ( $4\text{-Ce}$ ).

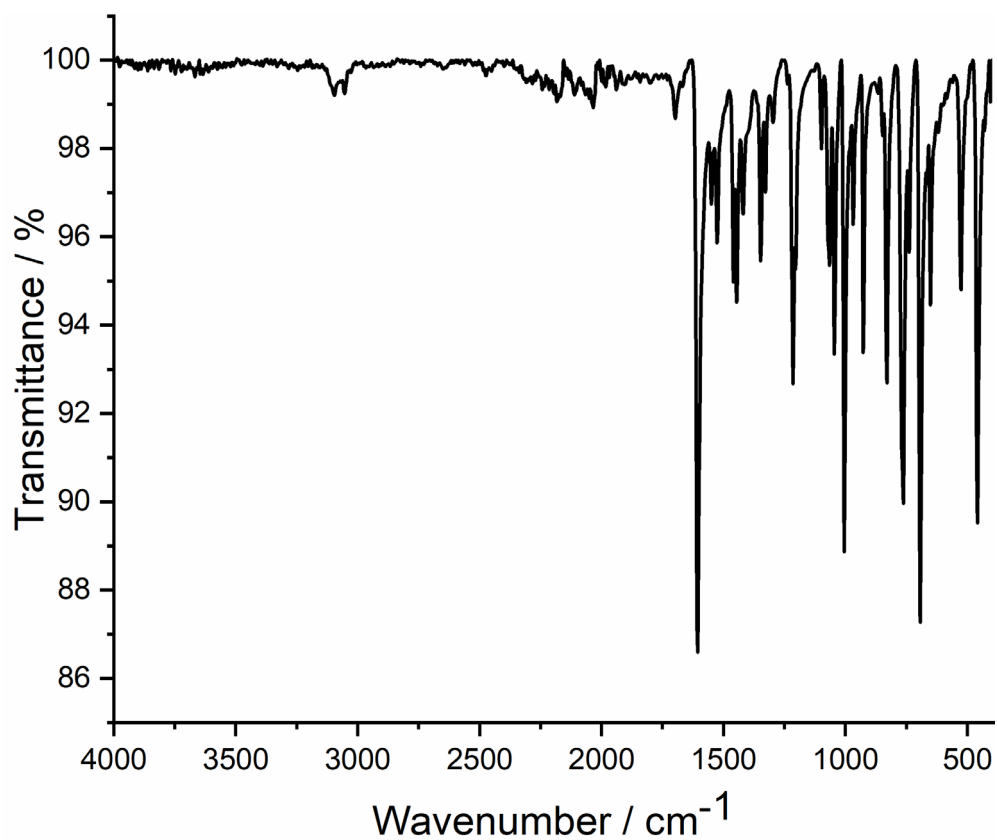

**Figure S41.** The infrared spectrum (ATR) of coordination polymer of  ${}^3[\text{La}(\text{4-PyPz})_3]$  (**4-La**).

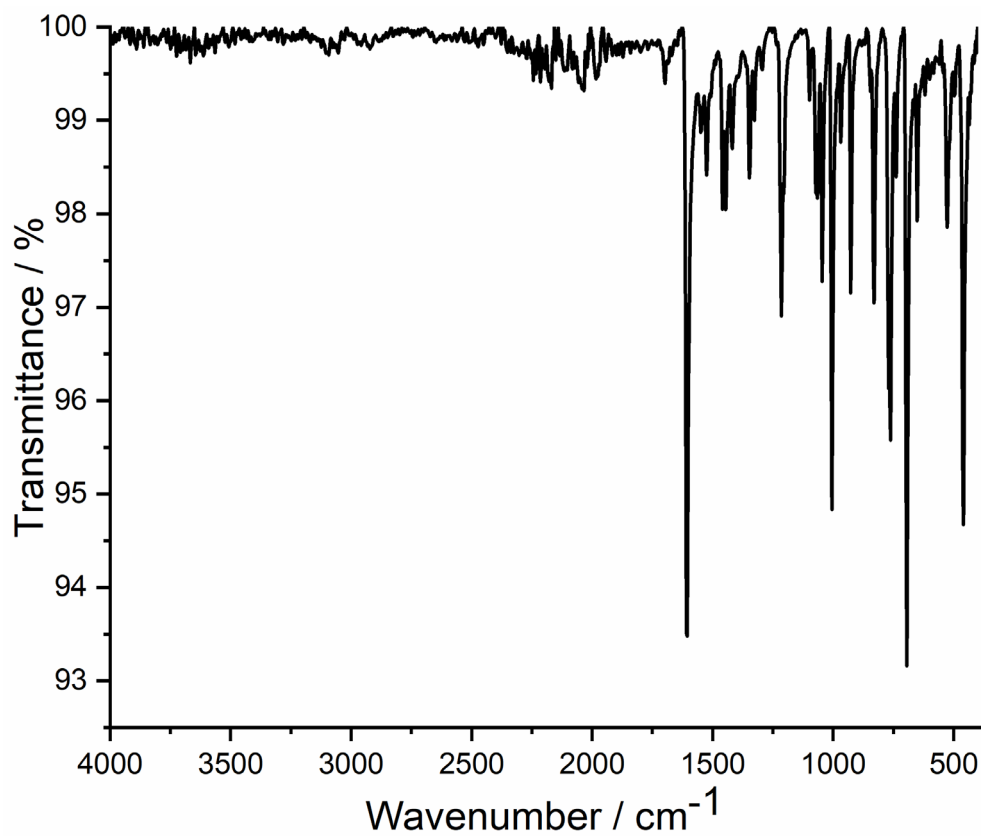

**Figure S42.** The infrared spectrum (ATR) of coordination polymer of  ${}^3[\text{Ce}(\text{4-PyPz})_3]$  (**4-Ce**).

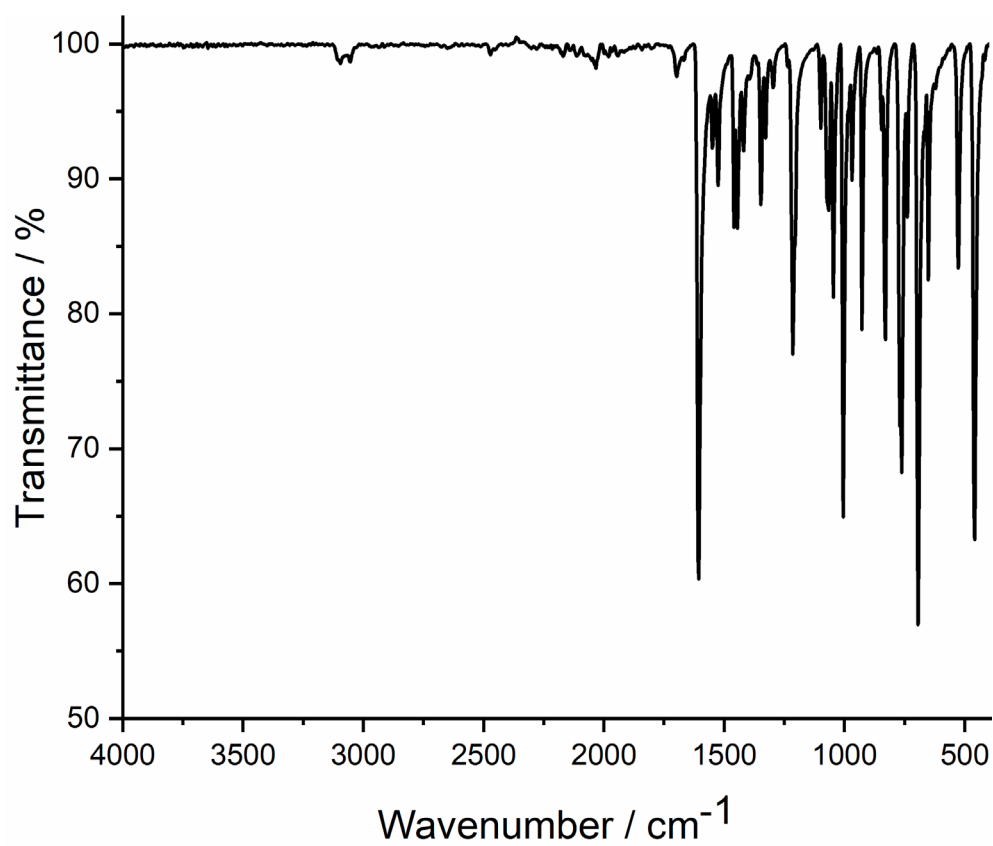

**Figure S43.** The infrared spectrum (ATR) of coordination polymer of  $3[\text{Pr}(4\text{-PyPz})_3]$  (**4-Pr**).

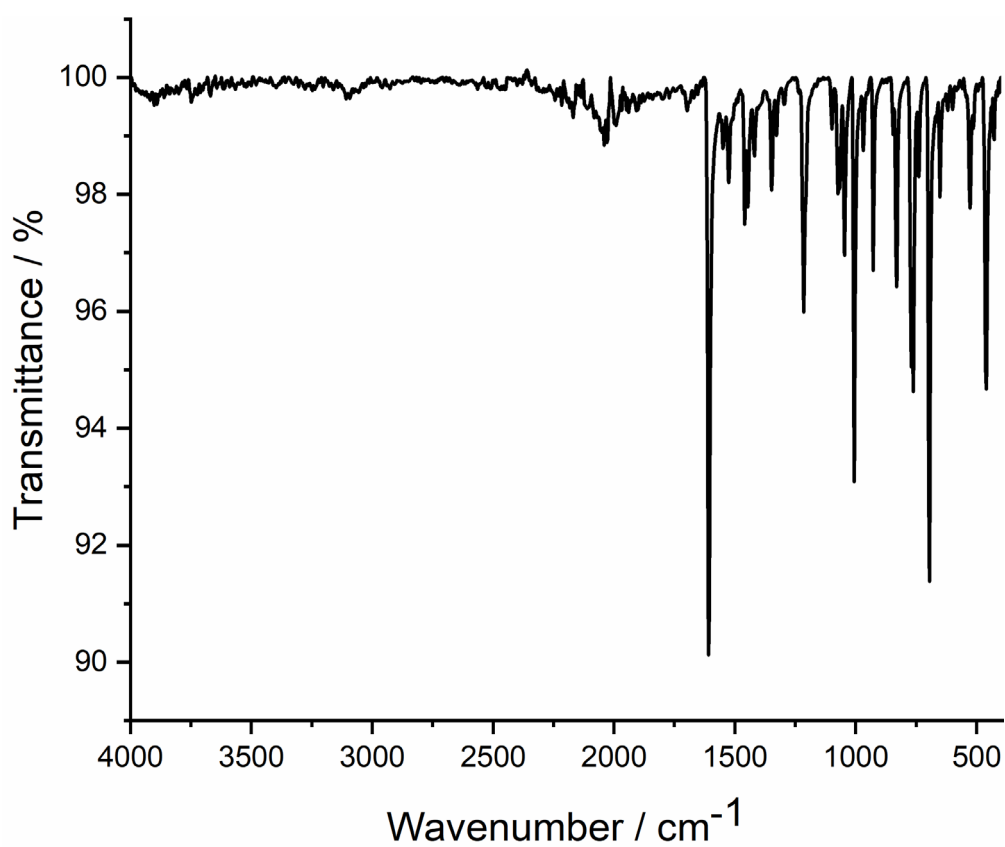

**Figure S44.** The infrared spectrum (ATR) of coordination polymer of  $3[\text{Nd}(4\text{-PyPz})_3]$  (**4-Nd**).



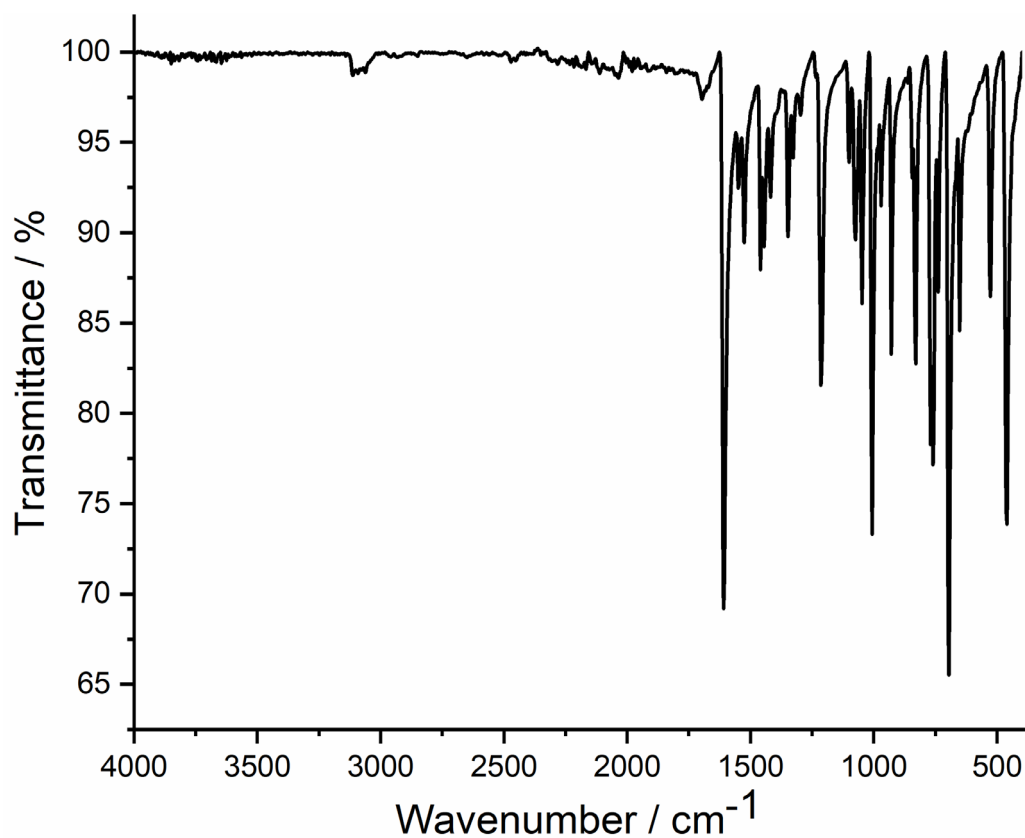

**Figure S45.** The infrared spectrum (ATR) of coordination polymer of  $3[\text{Ho}(\text{4-PyPz})_3]$  (**4-Ho**).

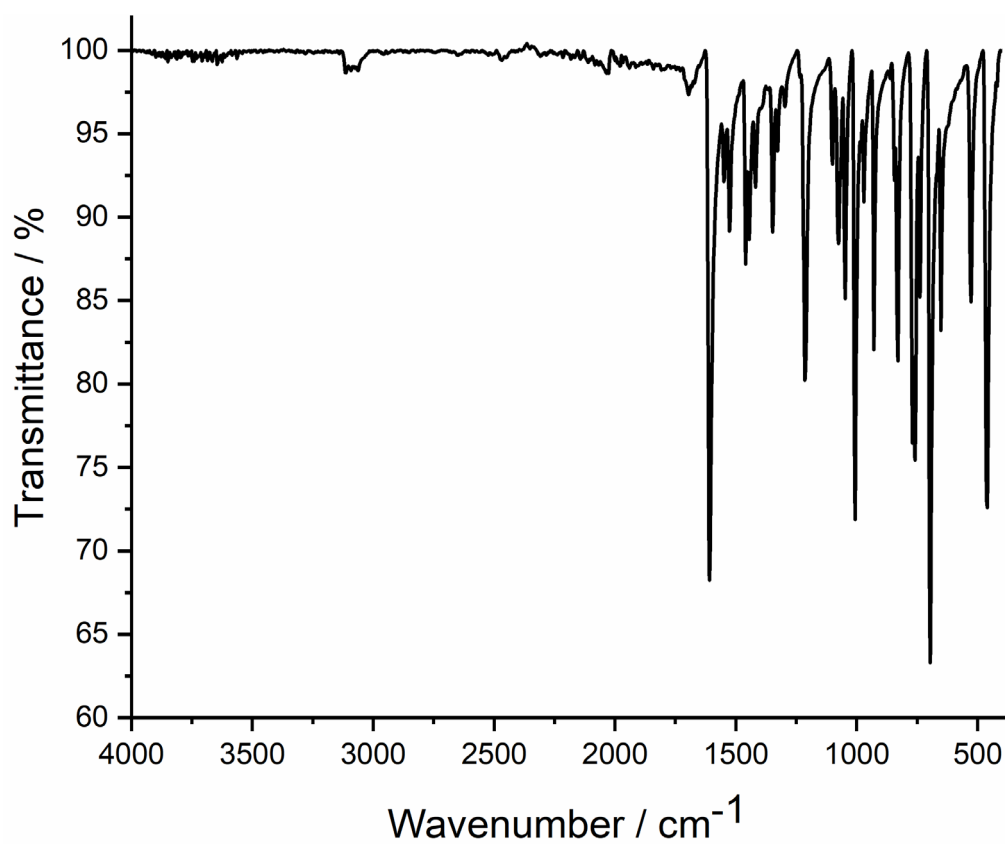

**Figure S46.** The infrared spectrum (ATR) of coordination polymer of  $3[\text{Er}(\text{4-PyPz})_3]$  (**4-Er**).

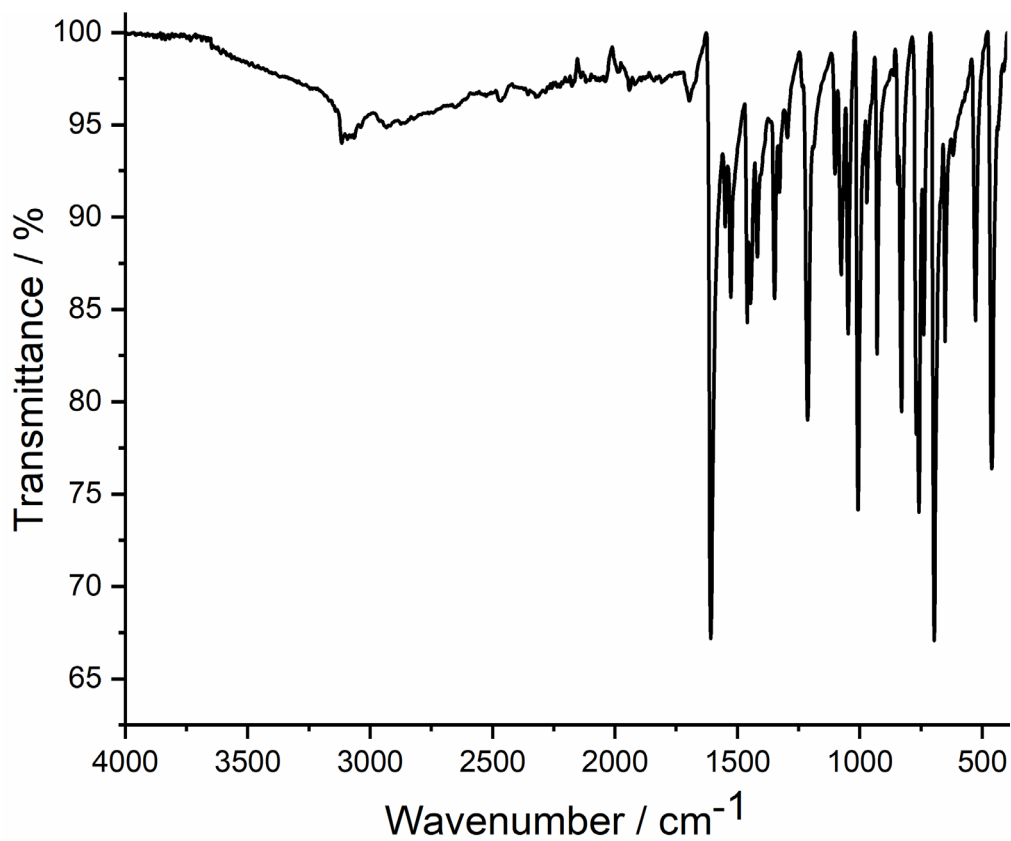

**Figure S47.** The infrared spectrum (ATR) of coordination polymer  $3[\text{Tm}(\text{4-PyPz})_3]$  (**4-Tm**).

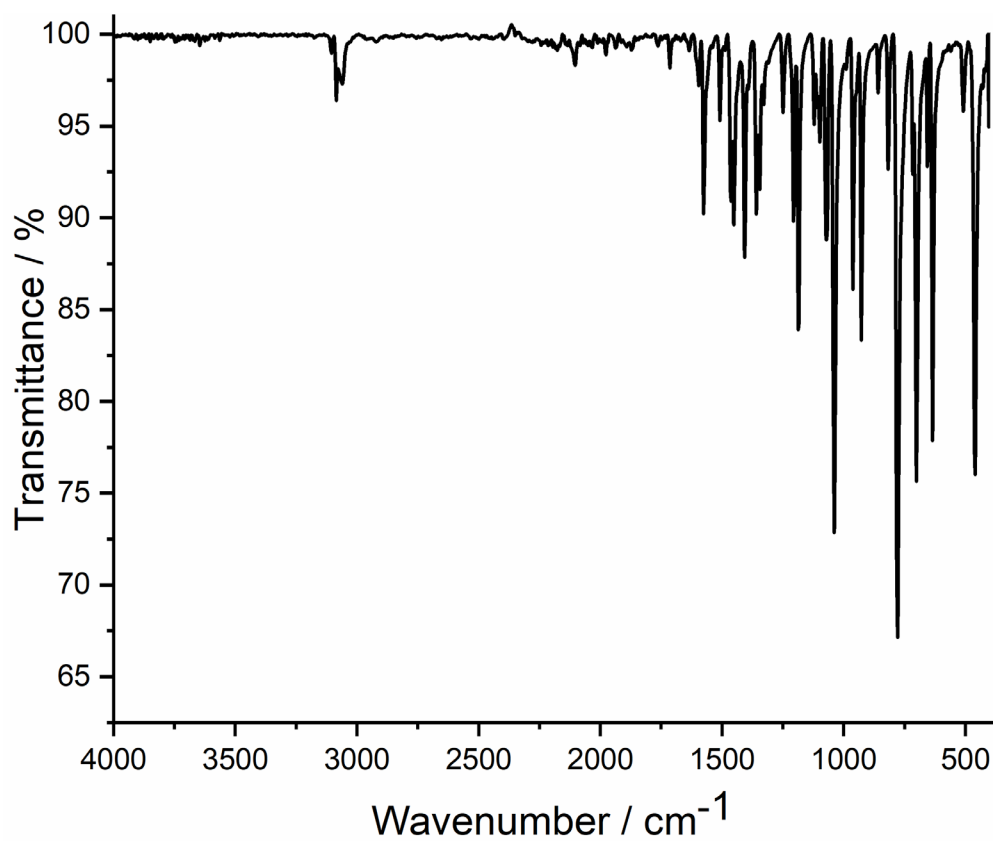

**Figure S48.** The infrared spectrum (ATR) of coordination polymer of  $3[\text{Ce}(\text{3-PyPz})_3]$  (**3-Ce**).

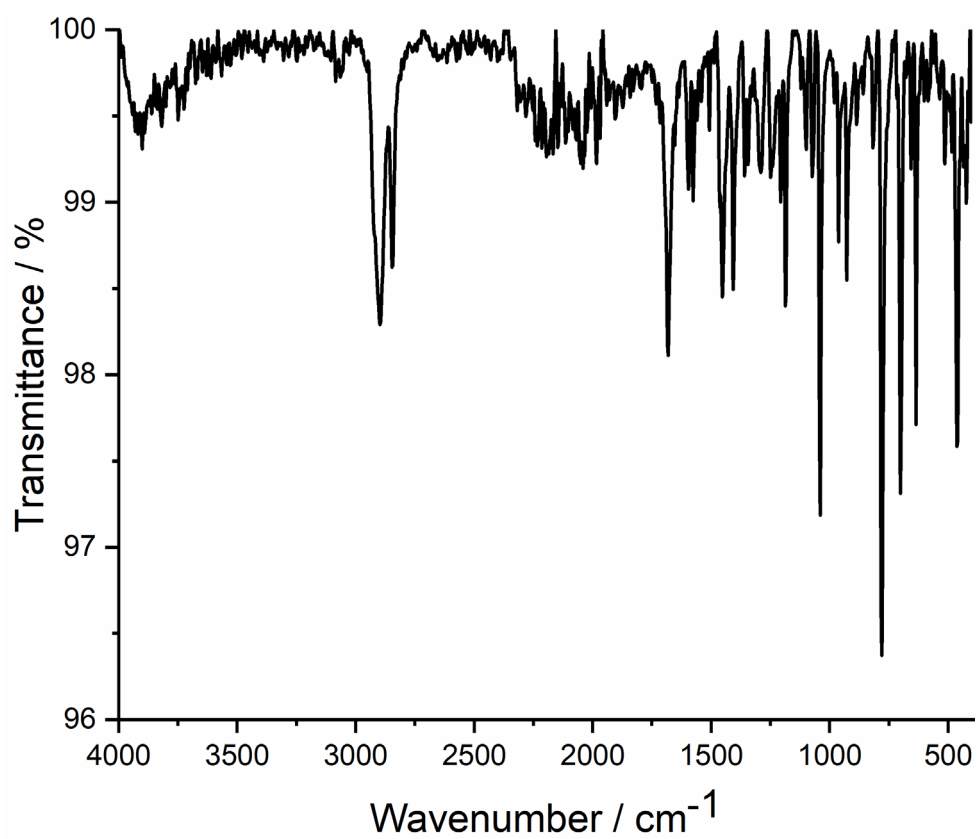

**Figure S49.** The infrared spectrum (ATR) of coordination polymer of  ${}^3[\text{Pr}(\text{3-PyPz})_3]$  (**3-Pr**).

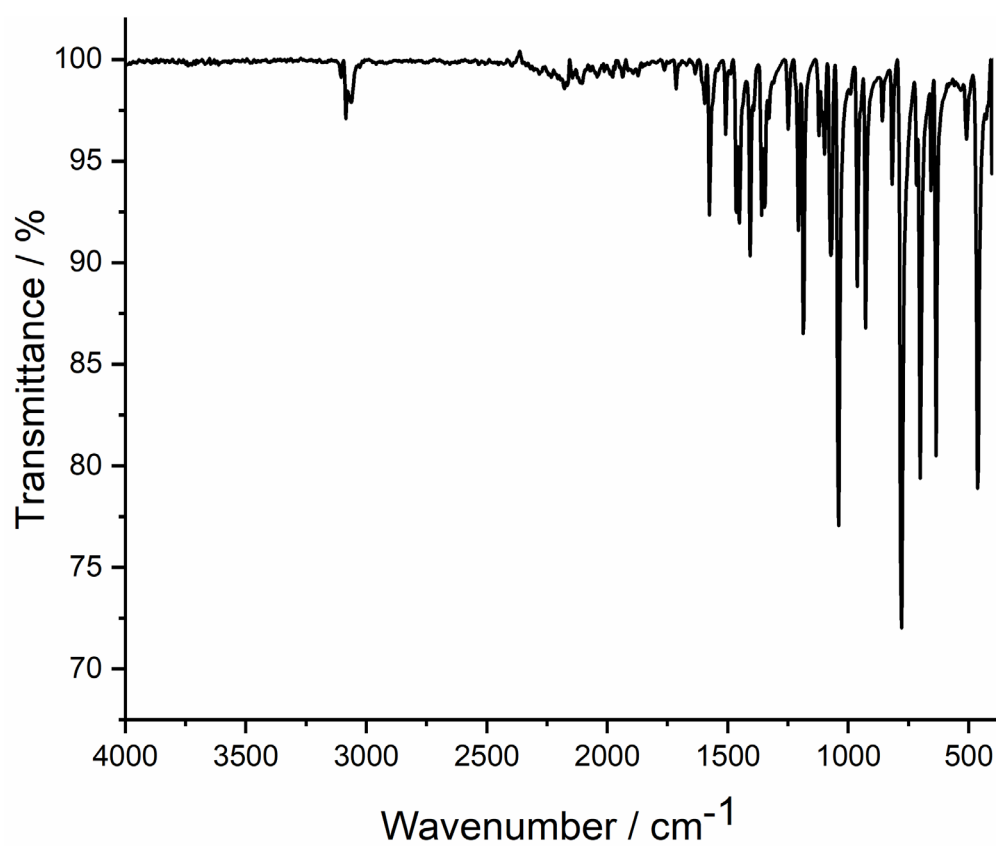

**Figure S50.** The infrared spectrum (ATR) of coordination polymer of  ${}^3[\text{Nd}(\text{3-PyPz})_3]$  (**3-Nd**).

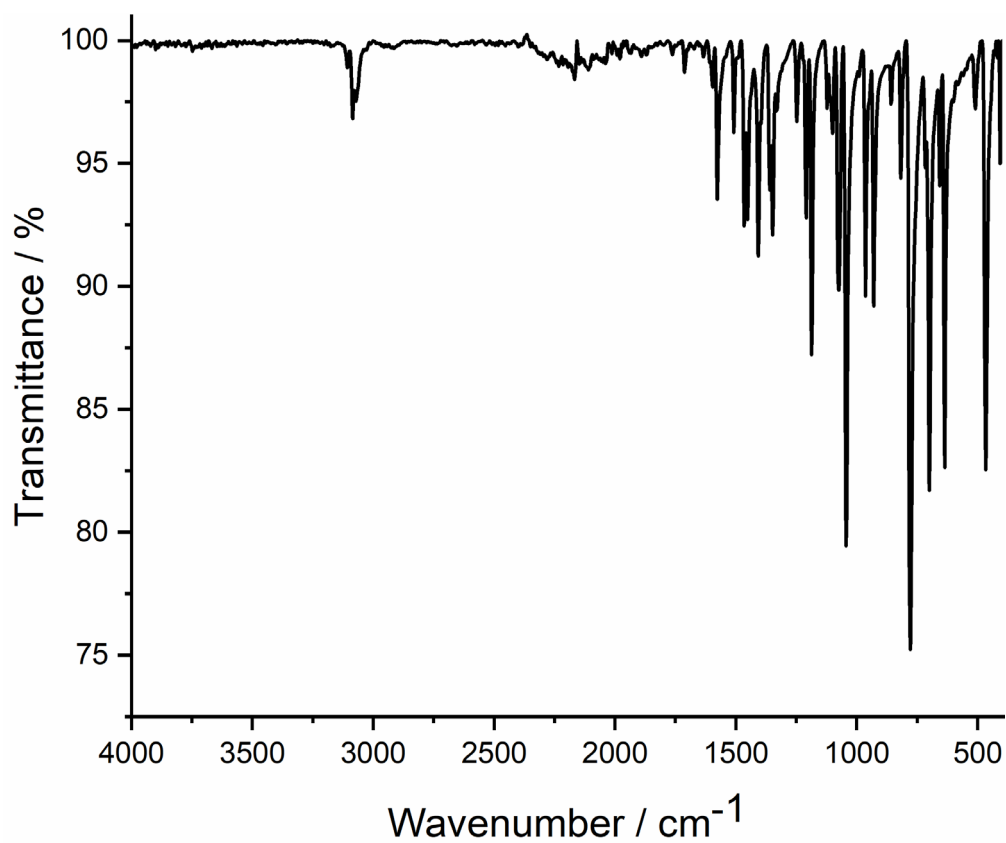

**Figure S51.** The infrared spectrum (ATR) of coordination polymer of  $3[\text{Ho}(\text{3-PyPz})_3]$  (**3-Ho**).

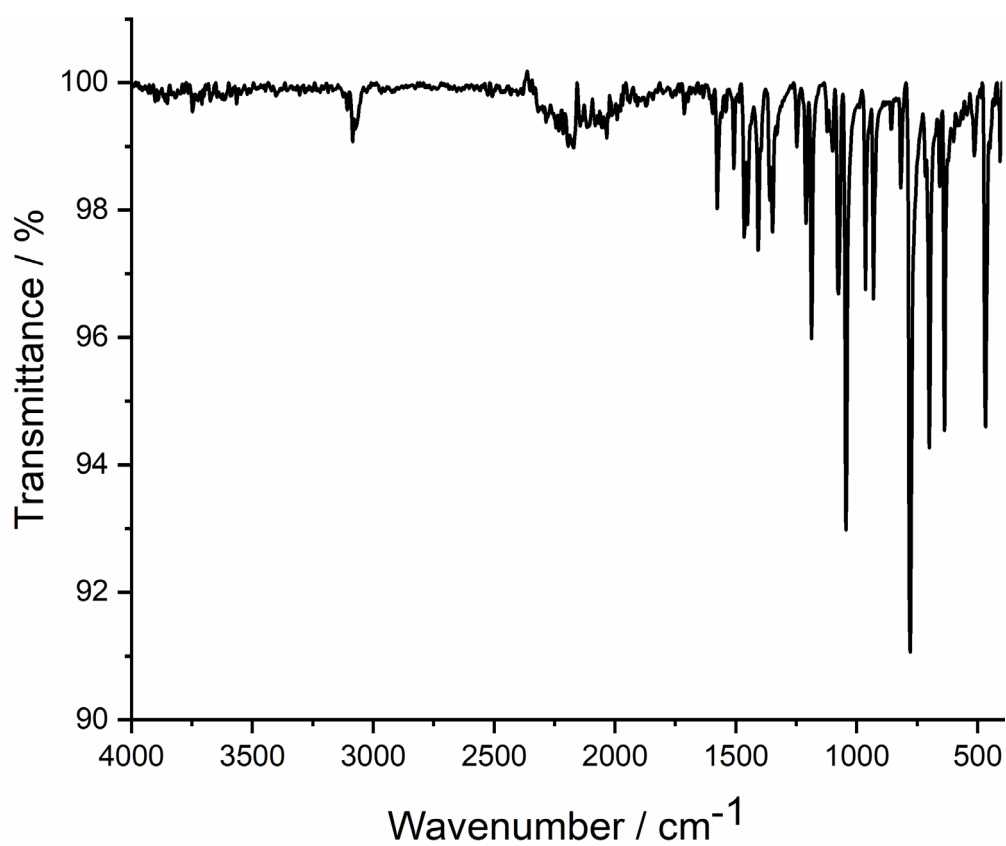

**Figure S52.** The infrared spectrum (ATR) of coordination polymer of  $3[\text{Er}(\text{3-PyPz})_3]$  (**3-Er**).

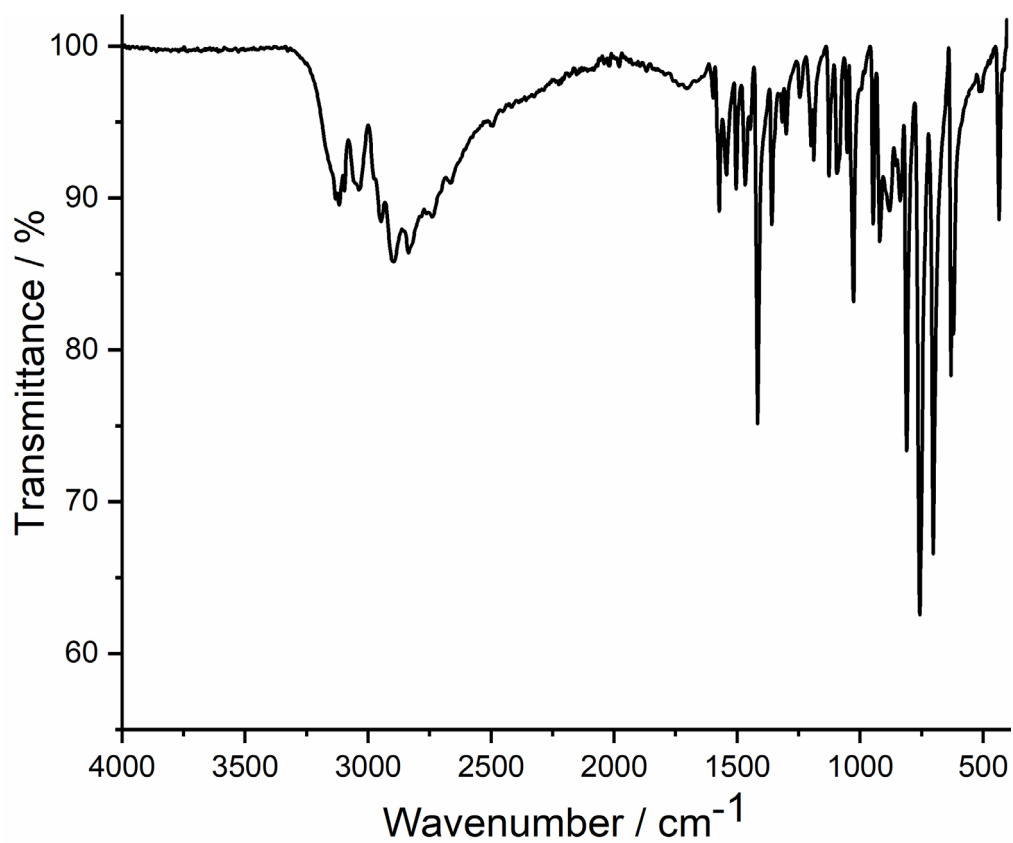

**Figure S53.** The infrared spectrum (ATR) of 3-PyPzH.

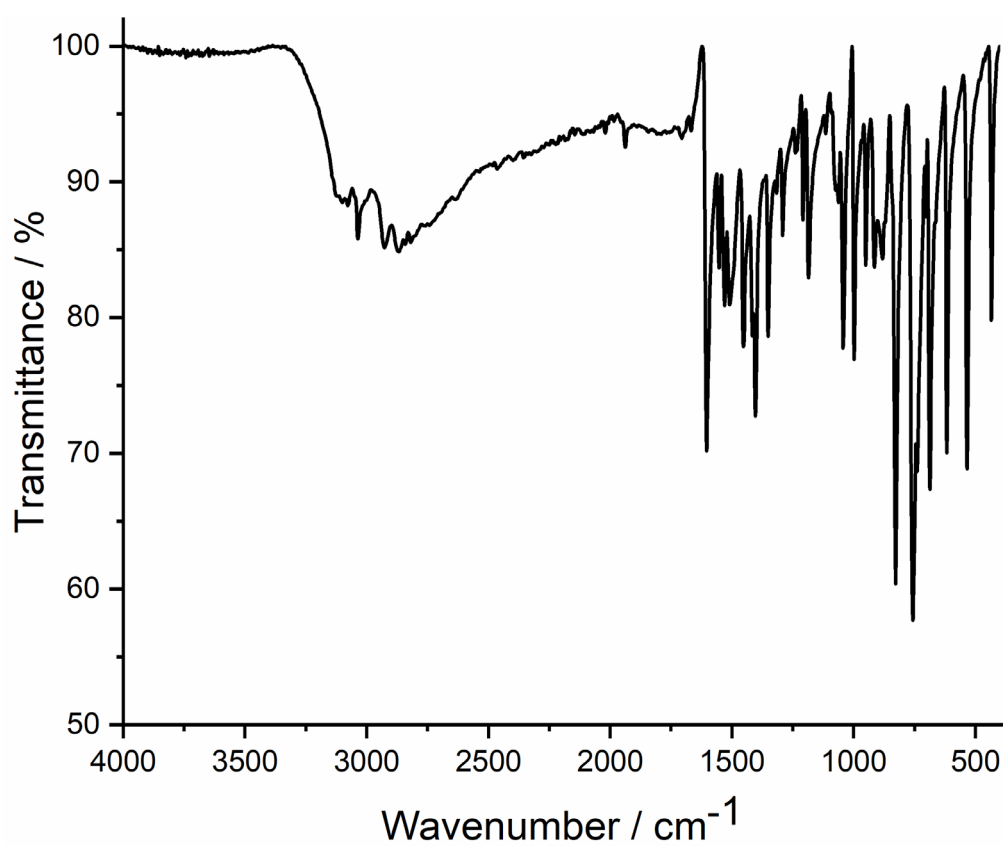

**Figure S54.** The infrared spectrum (ATR) of 4-PyPzH.
